# Supplementary material for: Preterm birth as a determinant of neurodevelopment and cognition in children (PRENCOG): protocol for an exposure-based cohort study in the UK
Source: PubMed Central journal article supplement (PMC11409314; doi:10.1136/bmjopen-2024-085365), 2024-09-16
Supplement: bmjopen-14-9-s001.pdf [file bmjopen-14-9-s001.pdf]

**Table of contents**

\\Protocol Development

MJT

Neonate-development

PRENCOG\_neonate

localizer\_neonate  
t2\_haste\_localiser  
t2\_blade\_v3  
t2\_space\_sag\_p4\_iso\_v2x  
DTI\_Neonate\_v6b\_dummy  
DTI\_Neonate\_v6b\_rev  
DTI\_Neonate\_v6b\_pt1  
DTI\_Neonate\_v6b\_pt2  
MPRAGE-v4  
B1Map\_tra  
MTSatOn\_neonate\_v3  
MTSatOff\_neonate\_v3  
MTSatT1\_neonate\_v3  
SWI\_v2  
t2\_blade\_dark-fluid\_tra\_v3

\\Protocol Development\MJT\Neonate-development\PRENCOG\_neonate\localizer\_neonate

TA: 0:12 PM: REF Voxel size: 0.5×0.5×7.0 mmPAT: Off Rel. SNR: 1.00 : fl

**Properties**

|                                               |                    |
|-----------------------------------------------|--------------------|
| Prio recon                                    | On                 |
| Load images to viewer                         | On                 |
| Inline movie                                  | Off                |
| Auto store images                             | On                 |
| Load images to stamp segments                 | On                 |
| Load images to graphic segments               | On                 |
| Auto open inline display                      | Off                |
| Auto close inline display                     | Off                |
| Start measurement without further preparation | Off                |
| Wait for user to start                        | Off                |
| Start measurements                            | Single measurement |

**Routine**

|                    |                                         |
|--------------------|-----------------------------------------|
| Slice group        | 1                                       |
| Slices             | 1                                       |
| Dist. factor       | 20 %                                    |
| Position           | Isocenter                               |
| Orientation        | Sagittal                                |
| Phase enc. dir.    | A >> P                                  |
| Slice group        | 2                                       |
| Slices             | 1                                       |
| Dist. factor       | 20 %                                    |
| Position           | L0.0 P47.8 F62.3 mm                     |
| Orientation        | Transversal                             |
| Phase enc. dir.    | A >> P                                  |
| Slice group        | 3                                       |
| Slices             | 1                                       |
| Dist. factor       | 20 %                                    |
| Position           | L0.0 P47.8 F62.3 mm                     |
| Orientation        | Coronal                                 |
| Phase enc. dir.    | R >> L                                  |
| AutoAlign          | ---                                     |
| Phase oversampling | 0 %                                     |
| FoV read           | 250 mm                                  |
| FoV phase          | 100.0 %                                 |
| Slice thickness    | 7.0 mm                                  |
| TR                 | 7.5 ms                                  |
| TE                 | 3.69 ms                                 |
| Averages           | 2                                       |
| Concatenations     | 3                                       |
| Filter             | Prescan Normalize,<br>Elliptical filter |
| Coil elements      | PeH;PeN                                 |

**Contrast - Common**

|                   |         |
|-------------------|---------|
| TR                | 7.5 ms  |
| TE                | 3.69 ms |
| TD                | 0 ms    |
| MTC               | Off     |
| Magn. preparation | None    |
| Flip angle        | 20 deg  |
| Fat suppr.        | None    |
| Water suppr.      | None    |
| SWI               | Off     |

**Contrast - Dynamic**

|                |            |
|----------------|------------|
| Averages       | 2          |
| Averaging mode | Short term |
| Reconstruction | Magnitude  |
| Measurements   | 1          |

**Contrast - Dynamic**

|                 |                  |
|-----------------|------------------|
| Multiple series | Each measurement |
|-----------------|------------------|

**Resolution - Common**

|                       |         |
|-----------------------|---------|
| FoV read              | 250 mm  |
| FoV phase             | 100.0 % |
| Slice thickness       | 7.0 mm  |
| Base resolution       | 256     |
| Phase resolution      | 91 %    |
| Phase partial Fourier | Off     |
| Interpolation         | On      |

**Resolution - iPAT**

|          |      |
|----------|------|
| PAT mode | None |
|----------|------|

**Resolution - Filter Image**

|                   |     |
|-------------------|-----|
| Image Filter      | Off |
| Distortion Corr.  | Off |
| Prescan Normalize | On  |
| Unfiltered images | Off |
| Normalize         | Off |
| B1 filter         | Off |

**Resolution - Filter Rawdata**

|                   |     |
|-------------------|-----|
| Raw filter        | Off |
| Elliptical filter | On  |

**Geometry - Common**

|                  |                     |
|------------------|---------------------|
| Slice group      | 1                   |
| Slices           | 1                   |
| Dist. factor     | 20 %                |
| Position         | Isocenter           |
| Orientation      | Sagittal            |
| Phase enc. dir.  | A >> P              |
| Slice group      | 2                   |
| Slices           | 1                   |
| Dist. factor     | 20 %                |
| Position         | L0.0 P47.8 F62.3 mm |
| Orientation      | Transversal         |
| Phase enc. dir.  | A >> P              |
| Slice group      | 3                   |
| Slices           | 1                   |
| Dist. factor     | 20 %                |
| Position         | L0.0 P47.8 F62.3 mm |
| Orientation      | Coronal             |
| Phase enc. dir.  | R >> L              |
| FoV read         | 250 mm              |
| FoV phase        | 100.0 %             |
| Slice thickness  | 7.0 mm              |
| TR               | 7.5 ms              |
| Multi-slice mode | Sequential          |
| Series           | Interleaved         |
| Concatenations   | 3                   |

**Geometry - AutoAlign**

|                 |                     |
|-----------------|---------------------|
| Slice group     | 1                   |
| Position        | Isocenter           |
| Orientation     | Sagittal            |
| Phase enc. dir. | A >> P              |
| Slice group     | 2                   |
| Position        | L0.0 P47.8 F62.3 mm |

**Geometry - AutoAlign**

|                     |                     |
|---------------------|---------------------|
| Orientation         | Transversal         |
| Phase enc. dir.     | A >> P              |
| Slice group         | 3                   |
| Position            | L0.0 P47.8 F62.3 mm |
| Orientation         | Coronal             |
| Phase enc. dir.     | R >> L              |
| AutoAlign           | ---                 |
| Initial Position    | Isocenter           |
| L                   | 0.0 mm              |
| P                   | 0.0 mm              |
| H                   | 0.0 mm              |
| Initial Rotation    | 0.00 deg            |
| Initial Orientation | Sagittal            |

**Geometry - Saturation**

|                 |          |
|-----------------|----------|
| Saturation mode | Standard |
| Fat suppr.      | None     |
| Water suppr.    | None     |
| Special sat.    | None     |

**Geometry - Tim Planning Suite**

|                   |      |
|-------------------|------|
| Set-n-Go Protocol | Off  |
| Table position    | H    |
| Table position    | 0 mm |
| Inline Composing  | Off  |

**System - Miscellaneous**

|                     |                  |
|---------------------|------------------|
| Positioning mode    | REF              |
| Table position      | H                |
| Table position      | 0 mm             |
| MSMA                | S - C - T        |
| Sagittal            | R >> L           |
| Coronal             | A >> P           |
| Transversal         | F >> H           |
| Coil Combine Mode   | Adaptive Combine |
| Save uncombined     | Off              |
| Matrix Optimization | Off              |
| AutoAlign           | ---              |
| Coil Select Mode    | Default          |

**System - Adjustments**

|                          |          |
|--------------------------|----------|
| B0 Shim mode             | Tune up  |
| B1 Shim mode             | TrueForm |
| Adjust with body coil    | Off      |
| Confirm freq. adjustment | Off      |
| Assume Dominant Fat      | Off      |
| Assume Silicone          | Off      |
| Adjustment Tolerance     | Auto     |

**System - Adjust Volume**

|             |             |
|-------------|-------------|
| Position    | Isocenter   |
| Orientation | Transversal |
| Rotation    | 0.00 deg    |
| A >> P      | 263 mm      |
| R >> L      | 350 mm      |
| F >> H      | 350 mm      |
| Reset       | Off         |

**System - pTx Volumes**

|              |            |
|--------------|------------|
| B1 Shim mode | TrueForm   |
| Excitation   | Slice-sel. |

**System - Tx/Rx**

|                     |                |
|---------------------|----------------|
| Frequency 1H        | 123.244475 MHz |
| Correction factor   | 1              |
| Gain                | High           |
| Img. Scale Cor.     | 1.000          |
| Reset               | Off            |
| ? Ref. amplitude 1H | 0.000 V        |

**Physio - Signal1**

|                 |        |
|-----------------|--------|
| 1st Signal/Mode | None   |
| TR              | 7.5 ms |
| Concatenations  | 3      |
| Segments        | 1      |

**Physio - Cardiac**

|                   |         |
|-------------------|---------|
| Tagging           | None    |
| Magn. preparation | None    |
| Fat suppr.        | None    |
| Dark blood        | Off     |
| FoV read          | 250 mm  |
| FoV phase         | 100.0 % |
| Phase resolution  | 91 %    |

**Physio - PACE**

|                |     |
|----------------|-----|
| Resp. control  | Off |
| Concatenations | 3   |

**Inline - Common**

|                      |     |
|----------------------|-----|
| Subtract             | Off |
| Measurements         | 1   |
| StdDev               | Off |
| Liver registration   | Off |
| Save original images | On  |

**Inline - MIP**

|                      |     |
|----------------------|-----|
| MIP-Sag              | Off |
| MIP-Cor              | Off |
| MIP-Tra              | Off |
| MIP-Time             | Off |
| Save original images | On  |

**Inline - Soft Tissue**

|              |     |
|--------------|-----|
| Wash - In    | Off |
| Wash - Out   | Off |
| TTP          | Off |
| PEI          | Off |
| MIP - time   | Off |
| Measurements | 1   |

**Inline - Composing**

|                  |     |
|------------------|-----|
| Inline Composing | Off |
| Distortion Corr. | Off |

**Inline - MapIt**

|                      |         |
|----------------------|---------|
| Save original images | On      |
| MapIt                | None    |
| Flip angle           | 20 deg  |
| Measurements         | 1       |
| Contrasts            | 1       |
| TR                   | 7.5 ms  |
| TE                   | 3.69 ms |

**Sequence - Part 1**

|              |    |
|--------------|----|
| Introduction | On |
|--------------|----|

**Sequence - Part 1**

|                     |            |
|---------------------|------------|
| Dimension           | 2D         |
| Phase stabilisation | Off        |
| Asymmetric echo     | Allowed    |
| Contrasts           | 1          |
| Flow comp.          | No         |
| Multi-slice mode    | Sequential |
| Bandwidth           | 320 Hz/Px  |

**Sequence - Part 2**

|                          |            |
|--------------------------|------------|
| Segments                 | 1          |
| Acoustic noise reduction | None       |
| RF pulse type            | Fast       |
| Gradient mode            | Fast       |
| Excitation               | Slice-sel. |
| RF spoiling              | On         |

**Sequence - Assistant**

|               |     |
|---------------|-----|
| Mode          | Off |
| Allowed delay | 0 s |

\\Protocol Development\MJT\Neonate-development\PRENCOG\_neonate\t2\_haste\_localiser

TA: 6.0 s PM: REF Voxel size: 0.7×0.7×4.0 mmPAT: 2 Rel. SNR: 1.00 : h

**Properties**

|                                               |                    |
|-----------------------------------------------|--------------------|
| Prio recon                                    | Off                |
| Load images to viewer                         | On                 |
| Inline movie                                  | Off                |
| Auto store images                             | On                 |
| Load images to stamp segments                 | On                 |
| Load images to graphic segments               | On                 |
| Auto open inline display                      | Off                |
| Auto close inline display                     | Off                |
| Start measurement without further preparation | Off                |
| Wait for user to start                        | Off                |
| Start measurements                            | Single measurement |

**Routine**

|                    |                                         |
|--------------------|-----------------------------------------|
| Slice group        | 1                                       |
| Slices             | 1                                       |
| Dist. factor       | 30 %                                    |
| Position           | Isocenter                               |
| Orientation        | Sagittal                                |
| Phase enc. dir.    | A >> P                                  |
| Slice group        | 2                                       |
| Slices             | 1                                       |
| Dist. factor       | 30 %                                    |
| Position           | L0.0 P0.0 H5.2 mm                       |
| Orientation        | Transversal                             |
| Phase enc. dir.    | R >> L                                  |
| Slice group        | 3                                       |
| Slices             | 1                                       |
| Dist. factor       | 30 %                                    |
| Position           | L0.0 P0.0 H10.4 mm                      |
| Orientation        | Coronal                                 |
| Phase enc. dir.    | R >> L                                  |
| AutoAlign          | ---                                     |
| Phase oversampling | 0 %                                     |
| FoV read           | 220 mm                                  |
| FoV phase          | 100.0 %                                 |
| Slice thickness    | 4.0 mm                                  |
| TR                 | 1500.0 ms                               |
| TE                 | 94 ms                                   |
| Averages           | 1                                       |
| Concatenations     | 1                                       |
| Filter             | Prescan Normalize,<br>Elliptical filter |
| Coil elements      | HE1-4                                   |

**Contrast - Common**

|                   |           |
|-------------------|-----------|
| TR                | 1500.0 ms |
| TE                | 94 ms     |
| MTC               | Off       |
| Magn. preparation | None      |
| Flip angle        | 150 deg   |
| Fat suppr.        | None      |
| Water suppr.      | None      |
| Restore magn.     | Off       |

**Contrast - Dynamic**

|                 |                  |
|-----------------|------------------|
| Averages        | 1                |
| Averaging mode  | Long term        |
| Reconstruction  | Magnitude        |
| Measurements    | 1                |
| Multiple series | Each measurement |

**Resolution - Common**

|                       |         |
|-----------------------|---------|
| FoV read              | 220 mm  |
| FoV phase             | 100.0 % |
| Slice thickness       | 4.0 mm  |
| Base resolution       | 320     |
| Phase resolution      | 80 %    |
| Phase partial Fourier | 4/8     |
| Interpolation         | Off     |

**Resolution - iPAT**

|                     |            |
|---------------------|------------|
| PAT mode            | GRAPPA     |
| Accel. factor PE    | 2          |
| Ref. lines PE       | 24         |
| Reference scan mode | Integrated |

**Resolution - Filter Image**

|                   |     |
|-------------------|-----|
| Image Filter      | Off |
| Distortion Corr.  | Off |
| Prescan Normalize | On  |
| Unfiltered images | Off |
| Normalize         | Off |
| B1 filter         | Off |

**Resolution - Filter Rawdata**

|                   |     |
|-------------------|-----|
| Raw filter        | Off |
| Elliptical filter | On  |

**Geometry - Common**

|                  |                    |
|------------------|--------------------|
| Slice group      | 1                  |
| Slices           | 1                  |
| Dist. factor     | 30 %               |
| Position         | Isocenter          |
| Orientation      | Sagittal           |
| Phase enc. dir.  | A >> P             |
| Slice group      | 2                  |
| Slices           | 1                  |
| Dist. factor     | 30 %               |
| Position         | L0.0 P0.0 H5.2 mm  |
| Orientation      | Transversal        |
| Phase enc. dir.  | R >> L             |
| Slice group      | 3                  |
| Slices           | 1                  |
| Dist. factor     | 30 %               |
| Position         | L0.0 P0.0 H10.4 mm |
| Orientation      | Coronal            |
| Phase enc. dir.  | R >> L             |
| FoV read         | 220 mm             |
| FoV phase        | 100.0 %            |
| Slice thickness  | 4.0 mm             |
| TR               | 1500.0 ms          |
| Multi-slice mode | Single shot        |
| Series           | Interleaved        |
| Concatenations   | 1                  |

**Geometry - AutoAlign**

|                 |                   |
|-----------------|-------------------|
| Slice group     | 1                 |
| Position        | Isocenter         |
| Orientation     | Sagittal          |
| Phase enc. dir. | A >> P            |
| Slice group     | 2                 |
| Position        | L0.0 P0.0 H5.2 mm |

**Geometry - AutoAlign**

|                     |                    |
|---------------------|--------------------|
| Orientation         | Transversal        |
| Phase enc. dir.     | R >> L             |
| Slice group         | 3                  |
| Position            | L0.0 P0.0 H10.4 mm |
| Orientation         | Coronal            |
| Phase enc. dir.     | R >> L             |
| AutoAlign           | ---                |
| Initial Position    | Isocenter          |
| L                   | 0.0 mm             |
| P                   | 0.0 mm             |
| H                   | 0.0 mm             |
| Initial Rotation    | 0.00 deg           |
| Initial Orientation | Sagittal           |

**Geometry - Saturation**

|               |      |
|---------------|------|
| Fat suppr.    | None |
| Water suppr.  | None |
| Restore magn. | Off  |
| Special sat.  | None |

**Geometry - Navigator****Geometry - Tim Planning Suite**

|                   |      |
|-------------------|------|
| Set-n-Go Protocol | Off  |
| Table position    | H    |
| Table position    | 0 mm |
| Inline Composing  | Off  |

**System - Miscellaneous**

|                     |                     |
|---------------------|---------------------|
| Positioning mode    | REF                 |
| Table position      | H                   |
| Table position      | 0 mm                |
| MSMA                | S - C - T           |
| Sagittal            | R >> L              |
| Coronal             | A >> P              |
| Transversal         | F >> H              |
| Coil Combine Mode   | Adaptive Combine    |
| Save uncombined     | Off                 |
| Matrix Optimization | Off                 |
| AutoAlign           | ---                 |
| Coil Select Mode    | On - AutoCoilSelect |

**System - Adjustments**

|                          |          |
|--------------------------|----------|
| B0 Shim mode             | Tune up  |
| B1 Shim mode             | TrueForm |
| Adjust with body coil    | Off      |
| Confirm freq. adjustment | Off      |
| Assume Dominant Fat      | Off      |
| Assume Silicone          | Off      |
| Adjustment Tolerance     | Auto     |

**System - Adjust Volume**

|             |             |
|-------------|-------------|
| Position    | Isocenter   |
| Orientation | Transversal |
| Rotation    | 0.00 deg    |
| A >> P      | 263 mm      |
| R >> L      | 350 mm      |
| F >> H      | 350 mm      |
| Reset       | Off         |

**System - pTx Volumes**

|              |          |
|--------------|----------|
| B1 Shim mode | TrueForm |
|--------------|----------|

**System - Tx/Rx**

|                     |                |
|---------------------|----------------|
| Frequency 1H        | 123.244475 MHz |
| Correction factor   | 1              |
| Gain                | High           |
| Img. Scale Cor.     | 1.000          |
| Reset               | Off            |
| ? Ref. amplitude 1H | 0.000 V        |

**Physio - Signal1**

|                 |           |
|-----------------|-----------|
| 1st Signal/Mode | None      |
| TR              | 1500.0 ms |
| Concatenations  | 1         |

**Physio - Cardiac**

|                   |         |
|-------------------|---------|
| Magn. preparation | None    |
| Fat suppr.        | None    |
| Dark blood        | Off     |
| FoV read          | 220 mm  |
| FoV phase         | 100.0 % |
| Phase resolution  | 80 %    |

**Physio - PACE**

|                |     |
|----------------|-----|
| Resp. control  | Off |
| Concatenations | 1   |

**Inline - Common**

|                      |     |
|----------------------|-----|
| Subtract             | Off |
| Measurements         | 1   |
| StdDev               | Off |
| Save original images | On  |

**Inline - MIP**

|                      |     |
|----------------------|-----|
| MIP-Sag              | Off |
| MIP-Cor              | Off |
| MIP-Tra              | Off |
| MIP-Time             | Off |
| Save original images | On  |

**Inline - Composing**

|                  |     |
|------------------|-----|
| Inline Composing | Off |
| Distortion Corr. | Off |

**Sequence - Part 1**

|                  |             |
|------------------|-------------|
| Introduction     | On          |
| Dimension        | 2D          |
| Contrasts        | 1           |
| Flow comp.       | No          |
| Multi-slice mode | Single shot |
| Echo spacing     | 7.22 ms     |
| Bandwidth        | 601 Hz/Px   |

**Sequence - Part 2**

|               |         |
|---------------|---------|
| RF pulse type | Normal  |
| Gradient mode | Whisper |
| Hypercho      | Off     |
| Turbo factor  | 256     |

**Sequence - Assistant**

|                |                |
|----------------|----------------|
| Mode           | Min flip angle |
| Min flip angle | 130 deg        |
| Allowed delay  | 60 s           |

\\Protocol Development\MJT\Neonate-development\PRENCOG\_neonate\t2\_blade\_v3

TA: 2:29 PM: REF Voxel size: 0.7×0.7×3.0 mmPAT: 2 Rel. SNR: 1.00 : qtseBR\_rr

### Properties

|                                               |                    |
|-----------------------------------------------|--------------------|
| Prio recon                                    | Off                |
| Load images to viewer                         | On                 |
| Inline movie                                  | Off                |
| Auto store images                             | On                 |
| Load images to stamp segments                 | On                 |
| Load images to graphic segments               | Off                |
| Auto open inline display                      | Off                |
| Auto close inline display                     | Off                |
| Start measurement without further preparation | Off                |
| Wait for user to start                        | Off                |
| Start measurements                            | Single measurement |

### Resolution - iPAT

|                     |            |
|---------------------|------------|
| PAT mode            | GRAPPA     |
| Accel. factor PE    | 2          |
| Ref. lines PE       | 8          |
| Reference scan mode | Integrated |

### Resolution - Filter Image

|                   |     |
|-------------------|-----|
| Image Filter      | Off |
| Distortion Corr.  | Off |
| Prescan Normalize | On  |
| Unfiltered images | Off |
| Normalize         | Off |
| B1 filter         | Off |

### Routine

|                    |                     |
|--------------------|---------------------|
| Slice group        | 1                   |
| Slices             | 40                  |
| Dist. factor       | 0 %                 |
| Position           | R1.2 P40.0 H50.2 mm |
| Orientation        | Transversal         |
| Phase enc. dir.    | A >> P              |
| AutoAlign          | ---                 |
| Phase oversampling | 0.0 %               |
| FoV read           | 220 mm              |
| FoV phase          | 100.0 %             |
| Slice thickness    | 3.0 mm              |
| TR                 | 4100.0 ms           |
| TE                 | 207 ms              |
| Averages           | 1                   |
| Concatenations     | 4                   |
| Filter             | Prescan Normalize   |
| Coil elements      | PeH;PeN             |

### Resolution - Filter Rawdata

|                   |     |
|-------------------|-----|
| Raw filter        | Off |
| Elliptical filter | Off |

### Geometry - Common

|                  |                     |
|------------------|---------------------|
| Slice group      | 1                   |
| Slices           | 40                  |
| Dist. factor     | 0 %                 |
| Position         | R1.2 P40.0 H50.2 mm |
| Orientation      | Transversal         |
| Phase enc. dir.  | A >> P              |
| FoV read         | 220 mm              |
| FoV phase        | 100.0 %             |
| Slice thickness  | 3.0 mm              |
| TR               | 4100.0 ms           |
| Multi-slice mode | Interleaved         |
| Series           | Interleaved         |
| Concatenations   | 4                   |

### Contrast - Common

|                   |           |
|-------------------|-----------|
| TR                | 4100.0 ms |
| TE                | 207 ms    |
| TD                | 0.0 ms    |
| MTC               | Off       |
| Magn. preparation | None      |
| Flip angle        | 90 deg    |
| Fat suppr.        | None      |
| Water suppr.      | None      |
| Restore magn.     | On        |

### Geometry - AutoAlign

|                     |                     |
|---------------------|---------------------|
| Slice group         | 1                   |
| Position            | R1.2 P40.0 H50.2 mm |
| Orientation         | Transversal         |
| Phase enc. dir.     | A >> P              |
| AutoAlign           | ---                 |
| Initial Position    | R1.2 P40.0 H50.2    |
| R                   | 1.2 mm              |
| P                   | 40.0 mm             |
| H                   | 50.2 mm             |
| Initial Rotation    | 0.00 deg            |
| Initial Orientation | Transversal         |

### Contrast - Dynamic

|                 |                  |
|-----------------|------------------|
| Averages        | 1                |
| Averaging mode  | Short term       |
| Reconstruction  | Magnitude        |
| Measurements    | 1                |
| Multiple series | Each measurement |

### Geometry - Saturation

|               |      |
|---------------|------|
| Fat suppr.    | None |
| Water suppr.  | None |
| Restore magn. | On   |
| Special sat.  | None |

### Resolution - Common

|                 |         |
|-----------------|---------|
| FoV read        | 220 mm  |
| FoV phase       | 100.0 % |
| Slice thickness | 3.0 mm  |
| Base resolution | 320     |
| BLADE coverage  | 100.0 % |
| Trajectory      | BLADE   |
| Interpolation   | Off     |

### Geometry - Navigator

### Geometry - Tim Planning Suite

|                   |      |
|-------------------|------|
| Set-n-Go Protocol | Off  |
| Table position    | H    |
| Table position    | 0 mm |
| Inline Composing  | Off  |

**System - Miscellaneous**

|                     |                     |
|---------------------|---------------------|
| Positioning mode    | REF                 |
| Table position      | H                   |
| Table position      | 0 mm                |
| MSMA                | S - C - T           |
| Sagittal            | R >> L              |
| Coronal             | A >> P              |
| Transversal         | F >> H              |
| Coil Combine Mode   | Adaptive Combine    |
| Save uncombined     | Off                 |
| Matrix Optimization | Off                 |
| AutoAlign           | ---                 |
| Coil Select Mode    | On - AutoCoilSelect |

**System - Adjustments**

|                          |          |
|--------------------------|----------|
| B0 Shim mode             | Tune up  |
| B1 Shim mode             | TrueForm |
| Adjust with body coil    | Off      |
| Confirm freq. adjustment | Off      |
| Assume Dominant Fat      | Off      |
| Assume Silicone          | Off      |
| Adjustment Tolerance     | Auto     |

**System - Adjust Volume**

|             |             |
|-------------|-------------|
| Position    | Isocenter   |
| Orientation | Transversal |
| Rotation    | 0.00 deg    |
| A >> P      | 263 mm      |
| R >> L      | 350 mm      |
| F >> H      | 350 mm      |
| Reset       | Off         |

**System - pTx Volumes**

|              |          |
|--------------|----------|
| B1 Shim mode | TrueForm |
|--------------|----------|

**System - Tx/Rx**

|                     |                |
|---------------------|----------------|
| Frequency 1H        | 123.244475 MHz |
| Correction factor   | 1              |
| Gain                | High           |
| Img. Scale Cor.     | 1.000          |
| Reset               | Off            |
| ? Ref. amplitude 1H | 0.000 V        |

**Physio - Signal1**

|                 |           |
|-----------------|-----------|
| 1st Signal/Mode | None      |
| TR              | 4100.0 ms |
| Concatenations  | 4         |

**Physio - Cardiac**

|                   |         |
|-------------------|---------|
| Magn. preparation | None    |
| Fat suppr.        | None    |
| Dark blood        | Off     |
| FoV read          | 220 mm  |
| FoV phase         | 100.0 % |
| BLADE coverage    | 100.0 % |
| Trajectory        | BLADE   |

**Physio - PACE**

|                |     |
|----------------|-----|
| Resp. control  | Off |
| Concatenations | 4   |

**Inline - Common**

|              |     |
|--------------|-----|
| Subtract     | Off |
| Measurements | 1   |

**Inline - Common**

|                      |     |
|----------------------|-----|
| StdDev               | Off |
| Save original images | On  |

**Inline - MIP**

|                      |     |
|----------------------|-----|
| MIP-Sag              | Off |
| MIP-Cor              | Off |
| MIP-Tra              | Off |
| MIP-Time             | Off |
| Save original images | On  |

**Inline - Composing**

|                  |     |
|------------------|-----|
| Inline Composing | Off |
| Distortion Corr. | Off |

**Sequence - Part 1**

|                     |             |
|---------------------|-------------|
| Introduction        | On          |
| Dimension           | 2D          |
| Compensate T2 decay | Off         |
| Contrasts           | 1           |
| Flow comp.          | Read        |
| Multi-slice mode    | Interleaved |
| Free echo spacing   | Off         |
| Echo spacing        | 10.9 ms     |
| Bandwidth           | 363 Hz/Px   |

**Sequence - Part 2**

|                          |              |
|--------------------------|--------------|
| Define                   | Turbo factor |
| Echo trains per slice    | 8            |
| Phase correction         | Automatic    |
| Acoustic noise reduction | Active       |
| RF pulse type            | Low SAR      |
| Gradient mode            | Fast         |
| Hyperecho                | On           |
| WARP                     | Off          |
| Motion correction        | On           |
| Red. EC sensitivity      | Off          |
| Turbo factor             | 36           |

**Sequence - Assistant**

|               |      |
|---------------|------|
| Mode          | Off  |
| Allowed delay | 30 s |



\\Protocol Development\MJT\Neonate-development\PRENCOG\_neonate\t2\_space\_sag\_p4\_iso\_v2x

TA: 2:13 PM: REF Voxel size: 1.0×1.0×1.0 mmPAT: 4 Rel. SNR: 1.00 : spcR

**Properties**

|                                               |                    |
|-----------------------------------------------|--------------------|
| Prio recon                                    | Off                |
| Load images to viewer                         | On                 |
| Inline movie                                  | Off                |
| Auto store images                             | On                 |
| Load images to stamp segments                 | Off                |
| Load images to graphic segments               | Off                |
| Auto open inline display                      | Off                |
| Auto close inline display                     | Off                |
| Start measurement without further preparation | Off                |
| Wait for user to start                        | Off                |
| Start measurements                            | Single measurement |

**Routine**

|                    |                               |
|--------------------|-------------------------------|
| Slab group         | 1                             |
| Slabs              | 1                             |
| Position           | R1.2 P36.9 H0.0 mm            |
| Orientation        | Sagittal                      |
| Phase enc. dir.    | A >> P                        |
| AutoAlign          | ---                           |
| Phase oversampling | 0 %                           |
| Slice oversampling | 0.0 %                         |
| Slices per slab    | 160                           |
| FoV read           | 128 mm                        |
| FoV phase          | 150.0 %                       |
| Slice thickness    | 1.00 mm                       |
| TR                 | 3200 ms                       |
| TE                 | 409 ms                        |
| Averages           | 1.4                           |
| Concatenations     | 1                             |
| Filter             | Raw filter, Prescan Normalize |
| Coil elements      | PeH;PeN                       |

**Contrast - Common**

|                   |          |
|-------------------|----------|
| TR                | 3200 ms  |
| TE                | 409 ms   |
| MTC               | Off      |
| Magn. preparation | None     |
| Fat suppr.        | Fat sat. |
| Fat sat. mode     | Strong   |
| Blood suppr.      | Off      |
| Restore magn.     | On       |

**Contrast - Dynamic**

|                 |                  |
|-----------------|------------------|
| Averages        | 1.4              |
| Reconstruction  | Magnitude        |
| Measurements    | 1                |
| Multiple series | Each measurement |

**Resolution - Common**

|                       |         |
|-----------------------|---------|
| FoV read              | 128 mm  |
| FoV phase             | 150.0 % |
| Slice thickness       | 1.00 mm |
| Base resolution       | 128     |
| Phase resolution      | 100 %   |
| Slice resolution      | 100 %   |
| Phase partial Fourier | Allowed |
| Slice partial Fourier | Off     |
| Interpolation         | Off     |

**Resolution - iPAT**

|                     |            |
|---------------------|------------|
| PAT mode            | GRAPPA     |
| Accel. factor PE    | 2          |
| Ref. lines PE       | 24         |
| Accel. factor 3D    | 2          |
| Ref. lines 3D       | 24         |
| Reference scan mode | Integrated |

**Resolution - Filter Image**

|                   |     |
|-------------------|-----|
| Image Filter      | Off |
| Distortion Corr.  | Off |
| Prescan Normalize | On  |
| Unfiltered images | Off |
| Normalize         | Off |
| B1 filter         | Off |

**Resolution - Filter Rawdata**

|                   |     |
|-------------------|-----|
| Raw filter        | On  |
| Elliptical filter | Off |

**Geometry - Common**

|                    |                    |
|--------------------|--------------------|
| Slab group         | 1                  |
| Slabs              | 1                  |
| Position           | R1.2 P36.9 H0.0 mm |
| Orientation        | Sagittal           |
| Phase enc. dir.    | A >> P             |
| Slice oversampling | 0.0 %              |
| Slices per slab    | 160                |
| FoV read           | 128 mm             |
| FoV phase          | 150.0 %            |
| Slice thickness    | 1.00 mm            |
| TR                 | 3200 ms            |
| Series             | Interleaved        |
| Concatenations     | 1                  |

**Geometry - AutoAlign**

|                     |                    |
|---------------------|--------------------|
| Slab group          | 1                  |
| Position            | R1.2 P36.9 H0.0 mm |
| Orientation         | Sagittal           |
| Phase enc. dir.     | A >> P             |
| AutoAlign           | ---                |
| Initial Position    | R1.2 P36.9 H0.0    |
| R                   | 1.2 mm             |
| P                   | 36.9 mm            |
| H                   | 0.0 mm             |
| Initial Rotation    | 0.00 deg           |
| Initial Orientation | Sagittal           |

**Geometry - Saturation**

|               |          |
|---------------|----------|
| Fat suppr.    | Fat sat. |
| Fat sat. mode | Strong   |
| Restore magn. | On       |
| Special sat.  | None     |

**Geometry - Navigator****Geometry - Tim Planning Suite**

|                   |      |
|-------------------|------|
| Set-n-Go Protocol | Off  |
| Table position    | H    |
| Table position    | 0 mm |
| Inline Composing  | Off  |

**System - Miscellaneous**

|                     |                     |
|---------------------|---------------------|
| Positioning mode    | REF                 |
| Table position      | H                   |
| Table position      | 0 mm                |
| MSMA                | S - C - T           |
| Sagittal            | R >> L              |
| Coronal             | A >> P              |
| Transversal         | F >> H              |
| Coil Combine Mode   | Adaptive Combine    |
| Save uncombined     | Off                 |
| Matrix Optimization | Off                 |
| AutoAlign           | ---                 |
| Coil Select Mode    | On - AutoCoilSelect |

**System - Adjustments**

|                          |          |
|--------------------------|----------|
| B0 Shim mode             | Standard |
| B1 Shim mode             | TrueForm |
| Adjust with body coil    | Off      |
| Confirm freq. adjustment | Off      |
| Assume Dominant Fat      | Off      |
| Assume Silicone          | Off      |
| Adjustment Tolerance     | Auto     |

**System - Adjust Volume**

|             |                    |
|-------------|--------------------|
| Position    | R1.2 P36.9 H0.0 mm |
| Orientation | Sagittal           |
| Rotation    | 90.00 deg          |
| F >> H      | 128 mm             |
| A >> P      | 192 mm             |
| R >> L      | 160 mm             |
| Reset       | Off                |

**System - pTx Volumes**

|              |          |
|--------------|----------|
| B1 Shim mode | TrueForm |
| Excitation   | Non-sel. |

**System - Tx/Rx**

|                     |                |
|---------------------|----------------|
| Frequency 1H        | 123.244475 MHz |
| Correction factor   | 1              |
| Gain                | High           |
| Img. Scale Cor.     | 3.000          |
| Reset               | Off            |
| ? Ref. amplitude 1H | 0.000 V        |

**Physio - Signal1**

|                 |         |
|-----------------|---------|
| 1st Signal/Mode | None    |
| Trigger delay   | 0 ms    |
| TR              | 3200 ms |
| Concatenations  | 1       |

**Physio - Cardiac**

|                   |          |
|-------------------|----------|
| Magn. preparation | None     |
| Fat suppr.        | Fat sat. |
| Dark blood        | Off      |
| FoV read          | 128 mm   |
| FoV phase         | 150.0 %  |
| Phase resolution  | 100 %    |

**Physio - PACE**

|                |     |
|----------------|-----|
| Resp. control  | Off |
| Concatenations | 1   |

**Inline - Common**

|          |     |
|----------|-----|
| Subtract | Off |
|----------|-----|

**Inline - Common**

|                      |     |
|----------------------|-----|
| Measurements         | 1   |
| StdDev               | Off |
| Save original images | On  |

**Inline - MIP**

|                      |     |
|----------------------|-----|
| MIP-Sag              | Off |
| MIP-Cor              | Off |
| MIP-Tra              | Off |
| MIP-Time             | Off |
| Save original images | On  |

**Inline - Composing**

|                  |     |
|------------------|-----|
| Inline Composing | Off |
| Distortion Corr. | Off |

**Sequence - Part 1**

|                     |           |
|---------------------|-----------|
| Introduction        | On        |
| Dimension           | 3D        |
| Elliptical scanning | Off       |
| Reordering          | Linear    |
| Flow comp.          | No        |
| Echo spacing        | 4.4 ms    |
| Adiabatic-mode      | Off       |
| Bandwidth           | 592 Hz/Px |

**Sequence - Part 2**

|                     |          |
|---------------------|----------|
| Echo train duration | 1034 ms  |
| RF pulse type       | Low SAR  |
| Gradient mode       | Whisper  |
| Excitation          | Non-sel. |
| Flip angle mode     | T2 var   |
| Turbo factor        | 282      |

**Sequence - Assistant**

|               |      |
|---------------|------|
| Allowed delay | 30 s |
|---------------|------|

\\Protocol Development\MJT\Neonate-development\PRENCOG\_neonate\DTI\_Neonate\_v6b\_dummy

TA: 0:28 PM: FIX Voxel size: 2.0×2.0×2.0 mmPAT: 4 Rel. SNR: 1.00 : epse

### Properties

|                                               |                    |
|-----------------------------------------------|--------------------|
| Prio recon                                    | Off                |
| Load images to viewer                         | On                 |
| Inline movie                                  | Off                |
| Auto store images                             | On                 |
| Load images to stamp segments                 | Off                |
| Load images to graphic segments               | Off                |
| Auto open inline display                      | Off                |
| Auto close inline display                     | Off                |
| Start measurement without further preparation | Off                |
| Wait for user to start                        | Off                |
| Start measurements                            | Single measurement |

### Routine

|                    |                                  |
|--------------------|----------------------------------|
| Slice group        | 1                                |
| Slices             | 58                               |
| Dist. factor       | 0 %                              |
| Position           | R1.2 P39.7 H47.8 mm              |
| Orientation        | Transversal                      |
| Phase enc. dir.    | R >> L                           |
| AutoAlign          | ---                              |
| Phase oversampling | 0 %                              |
| FoV read           | 256 mm                           |
| FoV phase          | 100.0 %                          |
| Slice thickness    | 2.0 mm                           |
| TR                 | 3500 ms                          |
| TE                 | 78.0 ms                          |
| Concatenations     | 1                                |
| Filter             | Raw filter, Prescan<br>Normalize |
| Coil elements      | PeH;PeN                          |

### Contrast - Common

|                   |          |
|-------------------|----------|
| TR                | 3500 ms  |
| TE                | 78.0 ms  |
| MTC               | Off      |
| Magn. preparation | None     |
| Fat suppr.        | Fat sat. |
| Fat sat. mode     | Strong   |

### Contrast - Dynamic

|                 |           |
|-----------------|-----------|
| Averaging mode  | Long term |
| Reconstruction  | Magnitude |
| Measurements    | 1         |
| Delay in TR     | 0 ms      |
| Multiple series | Off       |

### Resolution - Common

|                       |         |
|-----------------------|---------|
| FoV read              | 256 mm  |
| FoV phase             | 100.0 % |
| Slice thickness       | 2.0 mm  |
| Base resolution       | 128     |
| Phase resolution      | 100 %   |
| Phase partial Fourier | 7/8     |
| Interpolation         | Off     |

### Resolution - iPAT

|                  |              |
|------------------|--------------|
| Accel. mode      | Slice accel. |
| Accel. factor PE | 2            |
| Ref. lines PE    | 40           |

### Resolution - iPAT

|                     |              |
|---------------------|--------------|
| Accel. factor slice | 2            |
| Reference scan mode | EPI/separate |

### Resolution - Filter Image

|                     |     |
|---------------------|-----|
| Distortion Corr.    | Off |
| Prescan Normalize   | On  |
| Dynamic Field Corr. | Off |

### Resolution - Filter Rawdata

|                   |     |
|-------------------|-----|
| Raw filter        | On  |
| Elliptical filter | Off |

### Geometry - Common

|                  |                     |
|------------------|---------------------|
| Slice group      | 1                   |
| Slices           | 58                  |
| Dist. factor     | 0 %                 |
| Position         | R1.2 P39.7 H47.8 mm |
| Orientation      | Transversal         |
| Phase enc. dir.  | R >> L              |
| FoV read         | 256 mm              |
| FoV phase        | 100.0 %             |
| Slice thickness  | 2.0 mm              |
| TR               | 3500 ms             |
| Multi-slice mode | Interleaved         |
| Series           | Interleaved         |
| Concatenations   | 1                   |

### Geometry - AutoAlign

|                     |                     |
|---------------------|---------------------|
| Slice group         | 1                   |
| Position            | R1.2 P39.7 H47.8 mm |
| Orientation         | Transversal         |
| Phase enc. dir.     | R >> L              |
| AutoAlign           | ---                 |
| Initial Position    | R1.2 P39.7 H47.8    |
| R                   | 1.2 mm              |
| P                   | 39.7 mm             |
| H                   | 47.8 mm             |
| Initial Rotation    | 90.00 deg           |
| Initial Orientation | Transversal         |

### Geometry - Saturation

|               |          |
|---------------|----------|
| Fat suppr.    | Fat sat. |
| Fat sat. mode | Strong   |
| Special sat.  | None     |

### Geometry - Navigator

### Geometry - Tim Planning Suite

|                   |      |
|-------------------|------|
| Set-n-Go Protocol | Off  |
| Table position    | H    |
| Table position    | 0 mm |
| Inline Composing  | Off  |

### System - Miscellaneous

|                  |           |
|------------------|-----------|
| Positioning mode | FIX       |
| Table position   | H         |
| Table position   | 0 mm      |
| MSMA             | S - C - T |
| Sagittal         | R >> L    |

**System - Miscellaneous**

|                     |                     |
|---------------------|---------------------|
| Coronal             | A >> P              |
| Transversal         | F >> H              |
| Coil Combine Mode   | Adaptive Combine    |
| Matrix Optimization | Performance         |
| AutoAlign           | ---                 |
| Coil Select Mode    | On - AutoCoilSelect |

**System - Adjustments**

|                          |          |
|--------------------------|----------|
| B0 Shim mode             | Standard |
| B1 Shim mode             | TrueForm |
| Adjust with body coil    | Off      |
| Confirm freq. adjustment | Off      |
| Assume Dominant Fat      | Off      |
| Assume Silicone          | Off      |
| Adjustment Tolerance     | Auto     |

**System - Adjust Volume**

|             |                     |
|-------------|---------------------|
| Position    | R1.2 P39.7 H47.8 mm |
| Orientation | Transversal         |
| Rotation    | 90.00 deg           |
| R >> L      | 256 mm              |
| A >> P      | 256 mm              |
| F >> H      | 116 mm              |
| Reset       | Off                 |

**System - pTx Volumes**

|              |          |
|--------------|----------|
| B1 Shim mode | TrueForm |
| Excitation   | Standard |

**System - Tx/Rx**

|                     |                |
|---------------------|----------------|
| Frequency 1H        | 123.244475 MHz |
| Correction factor   | 1              |
| Gain                | High           |
| Img. Scale Cor.     | 1.000          |
| Reset               | Off            |
| ? Ref. amplitude 1H | 0.000 V        |

**Physio - Signal1**

|                 |         |
|-----------------|---------|
| 1st Signal/Mode | None    |
| TR              | 3500 ms |
| Concatenations  | 1       |

**Physio - PACE**

|                |     |
|----------------|-----|
| Resp. control  | Off |
| Concatenations | 1   |

**Diff - Neuro**

|                       |                     |
|-----------------------|---------------------|
| Diffusion mode        | Free                |
| Diff. directions      | 71                  |
| Diffusion Scheme      | Monopolar           |
| Diff. weightings      | 1                   |
| b-value               | 0 s/mm <sup>2</sup> |
| b-value               | 3                   |
| Diff. weighted images | On                  |
| Trace weighted images | Off                 |
| ADC maps              | Off                 |
| FA maps               | Off                 |
| Mosaic                | Off                 |
| Tensor                | Off                 |
| Noise level           | 40                  |

**Diff - Body**

|                |      |
|----------------|------|
| Diffusion mode | Free |
|----------------|------|

**Diff - Body**

|                       |                     |
|-----------------------|---------------------|
| Diff. directions      | 71                  |
| Diffusion Scheme      | Monopolar           |
| Diff. weightings      | 1                   |
| b-value               | 0 s/mm <sup>2</sup> |
| b-value               | 3                   |
| Diff. weighted images | On                  |
| Trace weighted images | Off                 |
| ADC maps              | Off                 |
| Exponential ADC Maps  | Off                 |
| FA maps               | Off                 |
| Invert Gray Scale     | Off                 |
| Calculated Image      | Off                 |
| b-Value >=            | 0 s/mm <sup>2</sup> |
| Noise level           | 40                  |

**Diff - Composing**

|                  |     |
|------------------|-----|
| Inline Composing | Off |
| Distortion Corr. | Off |

**Sequence - Part 1**

|                   |             |
|-------------------|-------------|
| Introduction      | Off         |
| Optimization      | None        |
| Multi-slice mode  | Interleaved |
| Free echo spacing | Off         |
| Echo spacing      | 0.78 ms     |
| Bandwidth         | 1446 Hz/Px  |

**Sequence - Part 2**

|               |          |
|---------------|----------|
| EPI factor    | 128      |
| RF pulse type | Low SAR  |
| Gradient mode | Normal   |
| Excitation    | Standard |

**Sequence - pTX Pulses**

\\Protocol Development\MJT\Neonate-development\PRENCOG\_neonate\DTI\_Neonate\_v6b\_rev

TA: 0:28 PM: FIX Voxel size: 2.0×2.0×2.0 mmPAT: 4 Rel. SNR: 1.00 : epse

**Properties**

|                                               |                    |
|-----------------------------------------------|--------------------|
| Prio recon                                    | Off                |
| Load images to viewer                         | On                 |
| Inline movie                                  | Off                |
| Auto store images                             | On                 |
| Load images to stamp segments                 | Off                |
| Load images to graphic segments               | Off                |
| Auto open inline display                      | Off                |
| Auto close inline display                     | Off                |
| Start measurement without further preparation | Off                |
| Wait for user to start                        | Off                |
| Start measurements                            | Single measurement |

**Routine**

|                    |                                  |
|--------------------|----------------------------------|
| Slice group        | 1                                |
| Slices             | 58                               |
| Dist. factor       | 0 %                              |
| Position           | R1.2 P39.7 H47.8 mm              |
| Orientation        | Transversal                      |
| Phase enc. dir.    | R >> L                           |
| AutoAlign          | ---                              |
| Phase oversampling | 0 %                              |
| FoV read           | 256 mm                           |
| FoV phase          | 100.0 %                          |
| Slice thickness    | 2.0 mm                           |
| TR                 | 3500 ms                          |
| TE                 | 78.0 ms                          |
| Concatenations     | 1                                |
| Filter             | Raw filter, Prescan<br>Normalize |
| Coil elements      | PeH;PeN                          |

**Contrast - Common**

|                   |          |
|-------------------|----------|
| TR                | 3500 ms  |
| TE                | 78.0 ms  |
| MTC               | Off      |
| Magn. preparation | None     |
| Fat suppr.        | Fat sat. |
| Fat sat. mode     | Strong   |

**Contrast - Dynamic**

|                 |           |
|-----------------|-----------|
| Averaging mode  | Long term |
| Reconstruction  | Magnitude |
| Measurements    | 1         |
| Delay in TR     | 0 ms      |
| Multiple series | Off       |

**Resolution - Common**

|                       |         |
|-----------------------|---------|
| FoV read              | 256 mm  |
| FoV phase             | 100.0 % |
| Slice thickness       | 2.0 mm  |
| Base resolution       | 128     |
| Phase resolution      | 100 %   |
| Phase partial Fourier | 7/8     |
| Interpolation         | Off     |

**Resolution - iPAT**

|                  |              |
|------------------|--------------|
| Accel. mode      | Slice accel. |
| Accel. factor PE | 2            |
| Ref. lines PE    | 40           |

**Resolution - iPAT**

|                     |              |
|---------------------|--------------|
| Accel. factor slice | 2            |
| Reference scan mode | EPI/separate |

**Resolution - Filter Image**

|                     |     |
|---------------------|-----|
| Distortion Corr.    | Off |
| Prescan Normalize   | On  |
| Dynamic Field Corr. | Off |

**Resolution - Filter Rawdata**

|                   |     |
|-------------------|-----|
| Raw filter        | On  |
| Elliptical filter | Off |

**Geometry - Common**

|                  |                     |
|------------------|---------------------|
| Slice group      | 1                   |
| Slices           | 58                  |
| Dist. factor     | 0 %                 |
| Position         | R1.2 P39.7 H47.8 mm |
| Orientation      | Transversal         |
| Phase enc. dir.  | R >> L              |
| FoV read         | 256 mm              |
| FoV phase        | 100.0 %             |
| Slice thickness  | 2.0 mm              |
| TR               | 3500 ms             |
| Multi-slice mode | Interleaved         |
| Series           | Interleaved         |
| Concatenations   | 1                   |

**Geometry - AutoAlign**

|                     |                     |
|---------------------|---------------------|
| Slice group         | 1                   |
| Position            | R1.2 P39.7 H47.8 mm |
| Orientation         | Transversal         |
| Phase enc. dir.     | R >> L              |
| AutoAlign           | ---                 |
| Initial Position    | R1.2 P39.7 H47.8    |
| R                   | 1.2 mm              |
| P                   | 39.7 mm             |
| H                   | 47.8 mm             |
| Initial Rotation    | 90.00 deg           |
| Initial Orientation | Transversal         |

**Geometry - Saturation**

|               |          |
|---------------|----------|
| Fat suppr.    | Fat sat. |
| Fat sat. mode | Strong   |
| Special sat.  | None     |

**Geometry - Navigator****Geometry - Tim Planning Suite**

|                   |      |
|-------------------|------|
| Set-n-Go Protocol | Off  |
| Table position    | H    |
| Table position    | 0 mm |
| Inline Composing  | Off  |

**System - Miscellaneous**

|                  |           |
|------------------|-----------|
| Positioning mode | FIX       |
| Table position   | H         |
| Table position   | 0 mm      |
| MSMA             | S - C - T |
| Sagittal         | R >> L    |

**System - Miscellaneous**

|                     |                     |
|---------------------|---------------------|
| Coronal             | A >> P              |
| Transversal         | F >> H              |
| Coil Combine Mode   | Adaptive Combine    |
| Matrix Optimization | Performance         |
| AutoAlign           | ---                 |
| Coil Select Mode    | On - AutoCoilSelect |

**System - Adjustments**

|                          |          |
|--------------------------|----------|
| B0 Shim mode             | Standard |
| B1 Shim mode             | TrueForm |
| Adjust with body coil    | Off      |
| Confirm freq. adjustment | Off      |
| Assume Dominant Fat      | Off      |
| Assume Silicone          | Off      |
| Adjustment Tolerance     | Auto     |

**System - Adjust Volume**

|             |                     |
|-------------|---------------------|
| Position    | R1.2 P39.7 H47.8 mm |
| Orientation | Transversal         |
| Rotation    | 90.00 deg           |
| R >> L      | 256 mm              |
| A >> P      | 256 mm              |
| F >> H      | 116 mm              |
| Reset       | Off                 |

**System - pTx Volumes**

|              |          |
|--------------|----------|
| B1 Shim mode | TrueForm |
| Excitation   | Standard |

**System - Tx/Rx**

|                     |                |
|---------------------|----------------|
| Frequency 1H        | 123.244475 MHz |
| Correction factor   | 1              |
| Gain                | High           |
| Img. Scale Cor.     | 1.000          |
| Reset               | Off            |
| ? Ref. amplitude 1H | 0.000 V        |

**Physio - Signal1**

|                 |         |
|-----------------|---------|
| 1st Signal/Mode | None    |
| TR              | 3500 ms |
| Concatenations  | 1       |

**Physio - PACE**

|                |     |
|----------------|-----|
| Resp. control  | Off |
| Concatenations | 1   |

**Diff - Neuro**

|                       |                     |
|-----------------------|---------------------|
| Diffusion mode        | MDDW                |
| Diff. directions      | 6                   |
| Diffusion Scheme      | Monopolar           |
| Diff. weightings      | 1                   |
| b-value               | 0 s/mm <sup>2</sup> |
| b-value               | 3                   |
| Diff. weighted images | On                  |
| Trace weighted images | Off                 |
| ADC maps              | Off                 |
| FA maps               | Off                 |
| Mosaic                | Off                 |
| Tensor                | Off                 |
| Noise level           | 40                  |

**Diff - Body**

|                |      |
|----------------|------|
| Diffusion mode | MDDW |
|----------------|------|

**Diff - Body**

|                       |                     |
|-----------------------|---------------------|
| Diff. directions      | 6                   |
| Diffusion Scheme      | Monopolar           |
| Diff. weightings      | 1                   |
| b-value               | 0 s/mm <sup>2</sup> |
| b-value               | 3                   |
| Diff. weighted images | On                  |
| Trace weighted images | Off                 |
| ADC maps              | Off                 |
| Exponential ADC Maps  | Off                 |
| FA maps               | Off                 |
| Invert Gray Scale     | Off                 |
| Calculated Image      | Off                 |
| b-Value >=            | 0 s/mm <sup>2</sup> |
| Noise level           | 40                  |

**Diff - Composing**

|                  |     |
|------------------|-----|
| Inline Composing | Off |
| Distortion Corr. | Off |

**Sequence - Part 1**

|                   |             |
|-------------------|-------------|
| Introduction      | Off         |
| Optimization      | None        |
| Multi-slice mode  | Interleaved |
| Free echo spacing | Off         |
| Echo spacing      | 0.78 ms     |
| Bandwidth         | 1446 Hz/Px  |

**Sequence - Part 2**

|               |          |
|---------------|----------|
| EPI factor    | 128      |
| RF pulse type | Low SAR  |
| Gradient mode | Normal   |
| Excitation    | Standard |

**Sequence - pTX Pulses**

\\Protocol Development\MJT\Neonate-development\PRENCOG\_neonate\DTI\_Neonate\_v6b\_pt1

TA: 4:29 PM: FIX Voxel size: 2.0x2.0x2.0 mmPAT: 4 Rel. SNR: 1.00 : epse

**Properties**

|                                               |                    |
|-----------------------------------------------|--------------------|
| Prio recon                                    | Off                |
| Load images to viewer                         | On                 |
| Inline movie                                  | Off                |
| Auto store images                             | On                 |
| Load images to stamp segments                 | Off                |
| Load images to graphic segments               | Off                |
| Auto open inline display                      | Off                |
| Auto close inline display                     | Off                |
| Start measurement without further preparation | Off                |
| Wait for user to start                        | Off                |
| Start measurements                            | Single measurement |

**Routine**

|                    |                                  |
|--------------------|----------------------------------|
| Slice group        | 1                                |
| Slices             | 58                               |
| Dist. factor       | 0 %                              |
| Position           | R1.2 P39.7 H47.8 mm              |
| Orientation        | Transversal                      |
| Phase enc. dir.    | L >> R                           |
| AutoAlign          | ---                              |
| Phase oversampling | 0 %                              |
| FoV read           | 256 mm                           |
| FoV phase          | 100.0 %                          |
| Slice thickness    | 2.0 mm                           |
| TR                 | 3500 ms                          |
| TE                 | 78.0 ms                          |
| Averages           | 1                                |
| Concatenations     | 1                                |
| Filter             | Raw filter, Prescan<br>Normalize |
| Coil elements      | PeH;PeN                          |

**Contrast - Common**

|                   |          |
|-------------------|----------|
| TR                | 3500 ms  |
| TE                | 78.0 ms  |
| MTC               | Off      |
| Magn. preparation | None     |
| Fat suppr.        | Fat sat. |
| Fat sat. mode     | Strong   |

**Contrast - Dynamic**

|                 |           |
|-----------------|-----------|
| Averages        | 1         |
| Averaging mode  | Long term |
| Reconstruction  | Magnitude |
| Measurements    | 1         |
| Delay in TR     | 0 ms      |
| Multiple series | Off       |

**Resolution - Common**

|                       |         |
|-----------------------|---------|
| FoV read              | 256 mm  |
| FoV phase             | 100.0 % |
| Slice thickness       | 2.0 mm  |
| Base resolution       | 128     |
| Phase resolution      | 100 %   |
| Phase partial Fourier | 7/8     |
| Interpolation         | Off     |

**Resolution - iPAT**

|             |              |
|-------------|--------------|
| Accel. mode | Slice accel. |
|-------------|--------------|

**Resolution - iPAT**

|                     |              |
|---------------------|--------------|
| Accel. factor PE    | 2            |
| Ref. lines PE       | 40           |
| Accel. factor slice | 2            |
| Reference scan mode | EPI/separate |

**Resolution - Filter Image**

|                     |     |
|---------------------|-----|
| Distortion Corr.    | Off |
| Prescan Normalize   | On  |
| Dynamic Field Corr. | Off |

**Resolution - Filter Rawdata**

|                   |     |
|-------------------|-----|
| Raw filter        | On  |
| Elliptical filter | Off |

**Geometry - Common**

|                  |                     |
|------------------|---------------------|
| Slice group      | 1                   |
| Slices           | 58                  |
| Dist. factor     | 0 %                 |
| Position         | R1.2 P39.7 H47.8 mm |
| Orientation      | Transversal         |
| Phase enc. dir.  | L >> R              |
| FoV read         | 256 mm              |
| FoV phase        | 100.0 %             |
| Slice thickness  | 2.0 mm              |
| TR               | 3500 ms             |
| Multi-slice mode | Interleaved         |
| Series           | Interleaved         |
| Concatenations   | 1                   |

**Geometry - AutoAlign**

|                     |                     |
|---------------------|---------------------|
| Slice group         | 1                   |
| Position            | R1.2 P39.7 H47.8 mm |
| Orientation         | Transversal         |
| Phase enc. dir.     | L >> R              |
| AutoAlign           | ---                 |
| Initial Position    | R1.2 P39.7 H47.8    |
| R                   | 1.2 mm              |
| P                   | 39.7 mm             |
| H                   | 47.8 mm             |
| Initial Rotation    | -90.00 deg          |
| Initial Orientation | Transversal         |

**Geometry - Saturation**

|               |          |
|---------------|----------|
| Fat suppr.    | Fat sat. |
| Fat sat. mode | Strong   |
| Special sat.  | None     |

**Geometry - Navigator****Geometry - Tim Planning Suite**

|                   |      |
|-------------------|------|
| Set-n-Go Protocol | Off  |
| Table position    | H    |
| Table position    | 0 mm |
| Inline Composing  | Off  |

**System - Miscellaneous**

|                  |      |
|------------------|------|
| Positioning mode | FIX  |
| Table position   | H    |
| Table position   | 0 mm |

**System - Miscellaneous**

|                     |                     |
|---------------------|---------------------|
| MSMA                | S - C - T           |
| Sagittal            | R >> L              |
| Coronal             | A >> P              |
| Transversal         | F >> H              |
| Coil Combine Mode   | Adaptive Combine    |
| Matrix Optimization | Performance         |
| AutoAlign           | ---                 |
| Coil Select Mode    | On - AutoCoilSelect |

**System - Adjustments**

|                          |          |
|--------------------------|----------|
| B0 Shim mode             | Standard |
| B1 Shim mode             | TrueForm |
| Adjust with body coil    | Off      |
| Confirm freq. adjustment | Off      |
| Assume Dominant Fat      | Off      |
| Assume Silicone          | Off      |
| Adjustment Tolerance     | Auto     |

**System - Adjust Volume**

|             |                     |
|-------------|---------------------|
| Position    | R1.2 P39.7 H47.8 mm |
| Orientation | Transversal         |
| Rotation    | -90.00 deg          |
| R >> L      | 256 mm              |
| A >> P      | 256 mm              |
| F >> H      | 116 mm              |
| Reset       | Off                 |

**System - pTx Volumes**

|              |          |
|--------------|----------|
| B1 Shim mode | TrueForm |
| Excitation   | Standard |

**System - Tx/Rx**

|                     |                |
|---------------------|----------------|
| Frequency 1H        | 123.244475 MHz |
| Correction factor   | 1              |
| Gain                | High           |
| Img. Scale Cor.     | 1.000          |
| Reset               | Off            |
| ? Ref. amplitude 1H | 0.000 V        |

**Physio - Signal1**

|                 |         |
|-----------------|---------|
| 1st Signal/Mode | None    |
| TR              | 3500 ms |
| Concatenations  | 1       |

**Physio - PACE**

|                |     |
|----------------|-----|
| Resp. control  | Off |
| Concatenations | 1   |

**Diff - Neuro**

|                       |                       |
|-----------------------|-----------------------|
| Diffusion mode        | Free                  |
| Diff. directions      | 71                    |
| Diffusion Scheme      | Monopolar             |
| Diff. weightings      | 2                     |
| b-value 1             | 0 s/mm <sup>2</sup>   |
| b-value 2             | 750 s/mm <sup>2</sup> |
| b-value 1             | 1                     |
| b-value 2             | 1                     |
| Diff. weighted images | On                    |
| Trace weighted images | Off                   |
| ADC maps              | Off                   |
| FA maps               | Off                   |
| Mosaic                | On                    |
| Tensor                | Off                   |

**Diff - Neuro**

|             |    |
|-------------|----|
| Noise level | 40 |
|-------------|----|

**Diff - Body**

|                       |                       |
|-----------------------|-----------------------|
| Diffusion mode        | Free                  |
| Diff. directions      | 71                    |
| Diffusion Scheme      | Monopolar             |
| Diff. weightings      | 2                     |
| b-value 1             | 0 s/mm <sup>2</sup>   |
| b-value 2             | 750 s/mm <sup>2</sup> |
| b-value 1             | 1                     |
| b-value 2             | 1                     |
| Diff. weighted images | On                    |
| Trace weighted images | Off                   |
| ADC maps              | Off                   |
| Exponential ADC Maps  | Off                   |
| FA maps               | Off                   |
| Invert Gray Scale     | Off                   |
| Calculated Image      | Off                   |
| b-Value >=            | 0 s/mm <sup>2</sup>   |
| Noise level           | 40                    |

**Diff - Composing**

|                  |     |
|------------------|-----|
| Inline Composing | Off |
| Distortion Corr. | Off |

**Sequence - Part 1**

|                   |             |
|-------------------|-------------|
| Introduction      | Off         |
| Optimization      | None        |
| Multi-slice mode  | Interleaved |
| Free echo spacing | Off         |
| Echo spacing      | 0.78 ms     |
| Bandwidth         | 1446 Hz/Px  |

**Sequence - Part 2**

|               |          |
|---------------|----------|
| EPI factor    | 128      |
| RF pulse type | Low SAR  |
| Gradient mode | Normal   |
| Excitation    | Standard |

**Sequence - pTX Pulses**



\\Protocol Development\MJT\Neonate-development\PRENCOG\_neonate\DTI\_Neonate\_v6b\_pt2

TA: 5:01 PM: FIX Voxel size: 2.0x2.0x2.0 mmPAT: 4 Rel. SNR: 1.00 : epse

**Properties**

|                                               |                    |
|-----------------------------------------------|--------------------|
| Prio recon                                    | Off                |
| Load images to viewer                         | On                 |
| Inline movie                                  | Off                |
| Auto store images                             | On                 |
| Load images to stamp segments                 | Off                |
| Load images to graphic segments               | Off                |
| Auto open inline display                      | Off                |
| Auto close inline display                     | Off                |
| Start measurement without further preparation | Off                |
| Wait for user to start                        | Off                |
| Start measurements                            | Single measurement |

**Routine**

|                    |                                  |
|--------------------|----------------------------------|
| Slice group        | 1                                |
| Slices             | 58                               |
| Dist. factor       | 0 %                              |
| Position           | R1.2 P39.7 H47.8 mm              |
| Orientation        | Transversal                      |
| Phase enc. dir.    | L >> R                           |
| AutoAlign          | ---                              |
| Phase oversampling | 0 %                              |
| FoV read           | 256 mm                           |
| FoV phase          | 100.0 %                          |
| Slice thickness    | 2.0 mm                           |
| TR                 | 3500 ms                          |
| TE                 | 78.0 ms                          |
| Averages           | 1                                |
| Concatenations     | 1                                |
| Filter             | Raw filter, Prescan<br>Normalize |
| Coil elements      | PeH;PeN                          |

**Contrast - Common**

|                   |          |
|-------------------|----------|
| TR                | 3500 ms  |
| TE                | 78.0 ms  |
| MTC               | Off      |
| Magn. preparation | None     |
| Fat suppr.        | Fat sat. |
| Fat sat. mode     | Strong   |

**Contrast - Dynamic**

|                 |           |
|-----------------|-----------|
| Averages        | 1         |
| Averaging mode  | Long term |
| Reconstruction  | Magnitude |
| Measurements    | 1         |
| Delay in TR     | 0 ms      |
| Multiple series | Off       |

**Resolution - Common**

|                       |         |
|-----------------------|---------|
| FoV read              | 256 mm  |
| FoV phase             | 100.0 % |
| Slice thickness       | 2.0 mm  |
| Base resolution       | 128     |
| Phase resolution      | 100 %   |
| Phase partial Fourier | 7/8     |
| Interpolation         | Off     |

**Resolution - iPAT**

|             |              |
|-------------|--------------|
| Accel. mode | Slice accel. |
|-------------|--------------|

**Resolution - iPAT**

|                     |              |
|---------------------|--------------|
| Accel. factor PE    | 2            |
| Ref. lines PE       | 40           |
| Accel. factor slice | 2            |
| Reference scan mode | EPI/separate |

**Resolution - Filter Image**

|                     |     |
|---------------------|-----|
| Distortion Corr.    | Off |
| Prescan Normalize   | On  |
| Dynamic Field Corr. | Off |

**Resolution - Filter Rawdata**

|                   |     |
|-------------------|-----|
| Raw filter        | On  |
| Elliptical filter | Off |

**Geometry - Common**

|                  |                     |
|------------------|---------------------|
| Slice group      | 1                   |
| Slices           | 58                  |
| Dist. factor     | 0 %                 |
| Position         | R1.2 P39.7 H47.8 mm |
| Orientation      | Transversal         |
| Phase enc. dir.  | L >> R              |
| FoV read         | 256 mm              |
| FoV phase        | 100.0 %             |
| Slice thickness  | 2.0 mm              |
| TR               | 3500 ms             |
| Multi-slice mode | Interleaved         |
| Series           | Interleaved         |
| Concatenations   | 1                   |

**Geometry - AutoAlign**

|                     |                     |
|---------------------|---------------------|
| Slice group         | 1                   |
| Position            | R1.2 P39.7 H47.8 mm |
| Orientation         | Transversal         |
| Phase enc. dir.     | L >> R              |
| AutoAlign           | ---                 |
| Initial Position    | R1.2 P39.7 H47.8    |
| R                   | 1.2 mm              |
| P                   | 39.7 mm             |
| H                   | 47.8 mm             |
| Initial Rotation    | -90.00 deg          |
| Initial Orientation | Transversal         |

**Geometry - Saturation**

|               |          |
|---------------|----------|
| Fat suppr.    | Fat sat. |
| Fat sat. mode | Strong   |
| Special sat.  | None     |

**Geometry - Navigator****Geometry - Tim Planning Suite**

|                   |      |
|-------------------|------|
| Set-n-Go Protocol | Off  |
| Table position    | H    |
| Table position    | 0 mm |
| Inline Composing  | Off  |

**System - Miscellaneous**

|                  |      |
|------------------|------|
| Positioning mode | FIX  |
| Table position   | H    |
| Table position   | 0 mm |

**System - Miscellaneous**

|                     |                     |
|---------------------|---------------------|
| MSMA                | S - C - T           |
| Sagittal            | R >> L              |
| Coronal             | A >> P              |
| Transversal         | F >> H              |
| Coil Combine Mode   | Adaptive Combine    |
| Matrix Optimization | Performance         |
| AutoAlign           | ---                 |
| Coil Select Mode    | On - AutoCoilSelect |

**System - Adjustments**

|                          |          |
|--------------------------|----------|
| B0 Shim mode             | Standard |
| B1 Shim mode             | TrueForm |
| Adjust with body coil    | Off      |
| Confirm freq. adjustment | Off      |
| Assume Dominant Fat      | Off      |
| Assume Silicone          | Off      |
| Adjustment Tolerance     | Auto     |

**System - Adjust Volume**

|             |                     |
|-------------|---------------------|
| Position    | R1.2 P39.7 H47.8 mm |
| Orientation | Transversal         |
| Rotation    | -90.00 deg          |
| R >> L      | 256 mm              |
| A >> P      | 256 mm              |
| F >> H      | 116 mm              |
| Reset       | Off                 |

**System - pTx Volumes**

|              |          |
|--------------|----------|
| B1 Shim mode | TrueForm |
| Excitation   | Standard |

**System - Tx/Rx**

|                     |                |
|---------------------|----------------|
| Frequency 1H        | 123.244475 MHz |
| Correction factor   | 1              |
| Gain                | High           |
| Img. Scale Cor.     | 1.000          |
| Reset               | Off            |
| ? Ref. amplitude 1H | 0.000 V        |

**Physio - Signal1**

|                 |         |
|-----------------|---------|
| 1st Signal/Mode | None    |
| TR              | 3500 ms |
| Concatenations  | 1       |

**Physio - PACE**

|                |     |
|----------------|-----|
| Resp. control  | Off |
| Concatenations | 1   |

**Diff - Neuro**

|                       |                        |
|-----------------------|------------------------|
| Diffusion mode        | Free                   |
| Diff. directions      | 80                     |
| Diffusion Scheme      | Monopolar              |
| Diff. weightings      | 2                      |
| b-value 1             | 0 s/mm <sup>2</sup>    |
| b-value 2             | 2500 s/mm <sup>2</sup> |
| b-value 1             | 1                      |
| b-value 2             | 1                      |
| Diff. weighted images | On                     |
| Trace weighted images | Off                    |
| ADC maps              | Off                    |
| FA maps               | Off                    |
| Mosaic                | On                     |
| Tensor                | Off                    |

**Diff - Neuro**

|             |    |
|-------------|----|
| Noise level | 40 |
|-------------|----|

**Diff - Body**

|                       |                        |
|-----------------------|------------------------|
| Diffusion mode        | Free                   |
| Diff. directions      | 80                     |
| Diffusion Scheme      | Monopolar              |
| Diff. weightings      | 2                      |
| b-value 1             | 0 s/mm <sup>2</sup>    |
| b-value 2             | 2500 s/mm <sup>2</sup> |
| b-value 1             | 1                      |
| b-value 2             | 1                      |
| Diff. weighted images | On                     |
| Trace weighted images | Off                    |
| ADC maps              | Off                    |
| Exponential ADC Maps  | Off                    |
| FA maps               | Off                    |
| Invert Gray Scale     | Off                    |
| Calculated Image      | Off                    |
| b-Value >=            | 0 s/mm <sup>2</sup>    |
| Noise level           | 40                     |

**Diff - Composing**

|                  |     |
|------------------|-----|
| Inline Composing | Off |
| Distortion Corr. | Off |

**Sequence - Part 1**

|                   |             |
|-------------------|-------------|
| Introduction      | Off         |
| Optimization      | None        |
| Multi-slice mode  | Interleaved |
| Free echo spacing | Off         |
| Echo spacing      | 0.78 ms     |
| Bandwidth         | 1446 Hz/Px  |

**Sequence - Part 2**

|               |          |
|---------------|----------|
| EPI factor    | 128      |
| RF pulse type | Low SAR  |
| Gradient mode | Normal   |
| Excitation    | Standard |

**Sequence - pTX Pulses**

## \\Protocol Development\MJT\Neonate-development\PRENCOG\_neonate\MPRAGE-v4

TA: 3:09 PM: FIX Voxel size: 1.0×1.0×1.0 mmPAT: 2 Rel. SNR: 1.00 : tfl

**Properties**

|                                               |                    |
|-----------------------------------------------|--------------------|
| Prio recon                                    | Off                |
| Load images to viewer                         | On                 |
| Inline movie                                  | Off                |
| Auto store images                             | On                 |
| Load images to stamp segments                 | On                 |
| Load images to graphic segments               | Off                |
| Auto open inline display                      | Off                |
| Auto close inline display                     | Off                |
| Start measurement without further preparation | Off                |
| Wait for user to start                        | Off                |
| Start measurements                            | Single measurement |

**Routine**

|                    |                     |
|--------------------|---------------------|
| Slab group         | 1                   |
| Slabs              | 1                   |
| Dist. factor       | 50 %                |
| Position           | R1.1 P38.9 F20.7 mm |
| Orientation        | Sagittal            |
| Phase enc. dir.    | A >> P              |
| AutoAlign          | ---                 |
| Phase oversampling | 20 %                |
| Slice oversampling | 0.0 %               |
| Slices per slab    | 160                 |
| FoV read           | 160 mm              |
| FoV phase          | 100.0 %             |
| Slice thickness    | 1.00 mm             |
| TR                 | 1970.0 ms           |
| TE                 | 4.69 ms             |
| Averages           | 1                   |
| Concatenations     | 1                   |
| Filter             | Prescan Normalize   |
| Coil elements      | PeH;PeN;SP1         |

**Contrast - Common**

|                   |             |
|-------------------|-------------|
| TR                | 1970.0 ms   |
| TE                | 4.69 ms     |
| Magn. preparation | Non-sel. IR |
| T1                | 1100 ms     |
| Flip angle        | 9 deg       |
| Fat suppr.        | None        |
| Water suppr.      | None        |

**Contrast - Dynamic**

|                 |                  |
|-----------------|------------------|
| Averages        | 1                |
| Averaging mode  | Long term        |
| Reconstruction  | Magnitude        |
| Measurements    | 1                |
| Multiple series | Each measurement |

**Resolution - Common**

|                       |         |
|-----------------------|---------|
| FoV read              | 160 mm  |
| FoV phase             | 100.0 % |
| Slice thickness       | 1.00 mm |
| Base resolution       | 160     |
| Phase resolution      | 100 %   |
| Slice resolution      | 100 %   |
| Phase partial Fourier | 7/8     |
| Slice partial Fourier | Off     |
| Interpolation         | Off     |

**Resolution - iPAT**

|                     |            |
|---------------------|------------|
| PAT mode            | GRAPPA     |
| Accel. factor PE    | 2          |
| Ref. lines PE       | 24         |
| Accel. factor 3D    | 1          |
| Reference scan mode | Integrated |

**Resolution - Filter Image**

|                   |     |
|-------------------|-----|
| Image Filter      | Off |
| Distortion Corr.  | Off |
| Prescan Normalize | On  |
| Unfiltered images | Off |
| Normalize         | Off |
| B1 filter         | Off |

**Resolution - Filter Rawdata**

|                   |     |
|-------------------|-----|
| Raw filter        | Off |
| Elliptical filter | Off |

**Geometry - Common**

|                    |                     |
|--------------------|---------------------|
| Slab group         | 1                   |
| Slabs              | 1                   |
| Dist. factor       | 50 %                |
| Position           | R1.1 P38.9 F20.7 mm |
| Orientation        | Sagittal            |
| Phase enc. dir.    | A >> P              |
| Slice oversampling | 0.0 %               |
| Slices per slab    | 160                 |
| FoV read           | 160 mm              |
| FoV phase          | 100.0 %             |
| Slice thickness    | 1.00 mm             |
| TR                 | 1970.0 ms           |
| Multi-slice mode   | Single shot         |
| Series             | Interleaved         |
| Concatenations     | 1                   |

**Geometry - AutoAlign**

|                     |                     |
|---------------------|---------------------|
| Slab group          | 1                   |
| Position            | R1.1 P38.9 F20.7 mm |
| Orientation         | Sagittal            |
| Phase enc. dir.     | A >> P              |
| AutoAlign           | ---                 |
| Initial Position    | R1.1 P38.9 F20.7    |
| R                   | 1.1 mm              |
| P                   | 38.9 mm             |
| F                   | 20.7 mm             |
| Initial Rotation    | 0.00 deg            |
| Initial Orientation | Sagittal            |

**Geometry - Navigator****Geometry - Tim Planning Suite**

|                   |      |
|-------------------|------|
| Set-n-Go Protocol | Off  |
| Table position    | H    |
| Table position    | 0 mm |
| Inline Composing  | Off  |

**System - Miscellaneous**

|                  |      |
|------------------|------|
| Positioning mode | FIX  |
| Table position   | H    |
| Table position   | 0 mm |

**System - Miscellaneous**

|                     |                     |
|---------------------|---------------------|
| MSMA                | S - C - T           |
| Sagittal            | R >> L              |
| Coronal             | A >> P              |
| Transversal         | F >> H              |
| Coil Combine Mode   | Adaptive Combine    |
| Save uncombined     | Off                 |
| Matrix Optimization | Off                 |
| Coil Focus          | Flat                |
| AutoAlign           | ---                 |
| Coil Select Mode    | On - AutoCoilSelect |

**System - Adjustments**

|                          |          |
|--------------------------|----------|
| B0 Shim mode             | Standard |
| B1 Shim mode             | TrueForm |
| Adjust with body coil    | Off      |
| Confirm freq. adjustment | Off      |
| Assume Dominant Fat      | Off      |
| Assume Silicone          | Off      |
| Adjustment Tolerance     | Auto     |

**System - Adjust Volume**

|             |                     |
|-------------|---------------------|
| Position    | R1.1 P38.9 F20.7 mm |
| Orientation | Sagittal            |
| Rotation    | 0.00 deg            |
| A >> P      | 160 mm              |
| F >> H      | 160 mm              |
| R >> L      | 160 mm              |
| Reset       | Off                 |

**System - pTx Volumes**

|              |          |
|--------------|----------|
| B1 Shim mode | TrueForm |
| Excitation   | Non-sel. |

**System - Tx/Rx**

|                     |                |
|---------------------|----------------|
| Frequency 1H        | 123.244475 MHz |
| Correction factor   | 1              |
| Gain                | Low            |
| Img. Scale Cor.     | 4.000          |
| Reset               | Off            |
| ? Ref. amplitude 1H | 0.000 V        |

**Physio - Signal1**

|                 |           |
|-----------------|-----------|
| 1st Signal/Mode | None      |
| TR              | 1970.0 ms |
| Concatenations  | 1         |

**Physio - Cardiac**

|                   |             |
|-------------------|-------------|
| Magn. preparation | Non-sel. IR |
| TI                | 1100 ms     |
| Fat suppr.        | None        |
| Dark blood        | Off         |
| FoV read          | 160 mm      |
| FoV phase         | 100.0 %     |
| Phase resolution  | 100 %       |

**Physio - PACE**

|                |     |
|----------------|-----|
| Resp. control  | Off |
| Concatenations | 1   |

**Inline - Common**

|              |     |
|--------------|-----|
| Subtract     | Off |
| Measurements | 1   |
| StdDev       | Off |

**Inline - Common**

|                      |    |
|----------------------|----|
| Save original images | On |
|----------------------|----|

**Inline - MIP**

|                      |     |
|----------------------|-----|
| MIP-Sag              | Off |
| MIP-Cor              | Off |
| MIP-Tra              | Off |
| MIP-Time             | Off |
| Save original images | On  |

**Inline - Composing**

|                  |     |
|------------------|-----|
| Inline Composing | Off |
| Distortion Corr. | Off |

**Inline - MapIt**

|                      |           |
|----------------------|-----------|
| Save original images | On        |
| MapIt                | None      |
| Flip angle           | 9 deg     |
| Measurements         | 1         |
| TR                   | 1970.0 ms |
| TE                   | 4.69 ms   |

**Sequence - Part 1**

|                     |             |
|---------------------|-------------|
| Introduction        | On          |
| Dimension           | 3D          |
| Elliptical scanning | Off         |
| Reordering          | Linear      |
| Asymmetric echo     | Off         |
| Flow comp.          | No          |
| Multi-slice mode    | Single shot |
| Echo spacing        | 10.8 ms     |
| Bandwidth           | 140 Hz/Px   |

**Sequence - Part 2**

|                         |          |
|-------------------------|----------|
| RF pulse type           | Normal   |
| Gradient mode           | Whisper  |
| Excitation              | Non-sel. |
| RF spoiling             | On       |
| Incr. Gradient spoiling | Off      |
| Turbo factor            | 160      |

**Sequence - Assistant**

|      |     |
|------|-----|
| Mode | Off |
|------|-----|

\\Protocol Development\MJT\Neonate-development\PRENCOG\_neonate\B1Map\_tra

TA: 0:19 PM: FIX Voxel size: 2.6×2.6×3.0 mmPAT: Off Rel. SNR: 1.00 : tf

**Properties**

|                                               |                    |
|-----------------------------------------------|--------------------|
| Prio recon                                    | Off                |
| Load images to viewer                         | On                 |
| Inline movie                                  | Off                |
| Auto store images                             | On                 |
| Load images to stamp segments                 | Off                |
| Load images to graphic segments               | Off                |
| Auto open inline display                      | Off                |
| Auto close inline display                     | Off                |
| Start measurement without further preparation | Off                |
| Wait for user to start                        | Off                |
| Start measurements                            | Single measurement |

**Routine**

|                    |                    |
|--------------------|--------------------|
| Slice group        | 1                  |
| Slices             | 31                 |
| Dist. factor       | 50 %               |
| Position           | R0.6 P2.2 H11.6 mm |
| Orientation        | Transversal        |
| Phase enc. dir.    | R >> L             |
| AutoAlign          | Head > Brain       |
| Phase oversampling | 0 %                |
| FoV read           | 166 mm             |
| FoV phase          | 93.8 %             |
| Slice thickness    | 3.0 mm             |
| TR                 | 9500.0 ms          |
| TE                 | 2.5 ms             |
| Averages           | 1                  |
| Concatenations     | 1                  |
| Filter             | Prescan Normalize  |
| Coil elements      | HEA;HEP            |

**Contrast - Common**

|                   |           |
|-------------------|-----------|
| TR                | 9500.0 ms |
| TE                | 2.5 ms    |
| Magn. preparation | None      |
| Flip angle        | 8 deg     |
| Fat suppr.        | None      |
| Water suppr.      | None      |

**Contrast - Dynamic**

|                 |                  |
|-----------------|------------------|
| Averages        | 1                |
| Reconstruction  | Magnitude        |
| Measurements    | 1                |
| Multiple series | Each measurement |

**Resolution - Common**

|                       |        |
|-----------------------|--------|
| FoV read              | 166 mm |
| FoV phase             | 93.8 % |
| Slice thickness       | 3.0 mm |
| Base resolution       | 64     |
| Phase resolution      | 100 %  |
| Phase partial Fourier | Off    |
| Interpolation         | Off    |

**Resolution - iPAT**

|          |      |
|----------|------|
| PAT mode | None |
|----------|------|

**Resolution - Filter Image**

|              |     |
|--------------|-----|
| Image Filter | Off |
|--------------|-----|

**Resolution - Filter Image**

|                   |     |
|-------------------|-----|
| Distortion Corr.  | Off |
| Prescan Normalize | On  |
| Unfiltered images | Off |
| Normalize         | Off |
| B1 filter         | Off |

**Resolution - Filter Rawdata**

|                   |     |
|-------------------|-----|
| Raw filter        | Off |
| Elliptical filter | Off |

**Geometry - Common**

|                  |                    |
|------------------|--------------------|
| Slice group      | 1                  |
| Slices           | 31                 |
| Dist. factor     | 50 %               |
| Position         | R0.6 P2.2 H11.6 mm |
| Orientation      | Transversal        |
| Phase enc. dir.  | R >> L             |
| FoV read         | 166 mm             |
| FoV phase        | 93.8 %             |
| Slice thickness  | 3.0 mm             |
| TR               | 9500.0 ms          |
| Multi-slice mode | Interleaved        |
| Series           | Interleaved        |
| Concatenations   | 1                  |

**Geometry - AutoAlign**

|                     |                    |
|---------------------|--------------------|
| Slice group         | 1                  |
| Position            | R0.6 P2.2 H11.6 mm |
| Orientation         | Transversal        |
| Phase enc. dir.     | R >> L             |
| AutoAlign           | Head > Brain       |
| Initial Position    | R0.6 P2.2 H11.6    |
| R                   | 0.6 mm             |
| P                   | 2.2 mm             |
| H                   | 11.6 mm            |
| Initial Rotation    | 90.00 deg          |
| Initial Orientation | Transversal        |

**Geometry - Tim Planning Suite**

|                   |      |
|-------------------|------|
| Set-n-Go Protocol | Off  |
| Table position    | H    |
| Table position    | 0 mm |
| Inline Composing  | Off  |

**System - Miscellaneous**

|                     |                |
|---------------------|----------------|
| Positioning mode    | FIX            |
| Table position      | H              |
| Table position      | 0 mm           |
| MSMA                | S - C - T      |
| Sagittal            | R >> L         |
| Coronal             | A >> P         |
| Transversal         | F >> H         |
| Coil Combine Mode   | Sum of Squares |
| Save uncombined     | Off            |
| Matrix Optimization | Off            |
| AutoAlign           | Head > Brain   |
| Coil Select Mode    | Default        |

**System - Adjustments**

|              |          |
|--------------|----------|
| B0 Shim mode | Standard |
|--------------|----------|

**System - Adjustments**

|                          |          |
|--------------------------|----------|
| B1 Shim mode             | TrueForm |
| Adjust with body coil    | Off      |
| Confirm freq. adjustment | Off      |
| Assume Dominant Fat      | Off      |
| Assume Silicone          | Off      |
| Adjustment Tolerance     | Auto     |

**System - Adjust Volume**

|             |                    |
|-------------|--------------------|
| Position    | R0.6 P2.2 H11.6 mm |
| Orientation | Transversal        |
| Rotation    | 90.00 deg          |
| R >> L      | 156 mm             |
| A >> P      | 166 mm             |
| F >> H      | 138 mm             |
| Reset       | Off                |

**System - pTx Volumes**

|              |            |
|--------------|------------|
| B1 Shim mode | TrueForm   |
| Excitation   | Slice-sel. |

**System - Tx/Rx**

|                     |                |
|---------------------|----------------|
| Frequency 1H        | 123.244475 MHz |
| Correction factor   | 1              |
| Gain                | High           |
| Img. Scale Cor.     | 1.000          |
| Reset               | Off            |
| ? Ref. amplitude 1H | 0.000 V        |

**Inline - Common**

|                      |     |
|----------------------|-----|
| Subtract             | Off |
| Measurements         | 1   |
| StdDev               | Off |
| Save original images | On  |

**Inline - MIP**

|                      |     |
|----------------------|-----|
| MIP-Sag              | Off |
| MIP-Cor              | Off |
| MIP-Tra              | Off |
| MIP-Time             | Off |
| Save original images | On  |

**Inline - Composing**

|                  |     |
|------------------|-----|
| Inline Composing | Off |
| Distortion Corr. | Off |

**Sequence - Part 1**

|                  |             |
|------------------|-------------|
| Introduction     | Off         |
| Dimension        | 2D          |
| Asymmetric echo  | Allowed     |
| Flow comp.       | No          |
| Multi-slice mode | Interleaved |
| Echo spacing     | 5 ms        |
| Bandwidth        | 580 Hz/Px   |

**Sequence - Part 2**

|               |            |
|---------------|------------|
| RF pulse type | Low SAR    |
| Gradient mode | Whisper    |
| Excitation    | Slice-sel. |
| RF spoiling   | On         |
| Turbo factor  | 60         |

**Sequence - Assistant**

|      |     |
|------|-----|
| Mode | Off |
|------|-----|

\\Protocol Development\MJT\Neonate-development\PRENCOG\_neonate\MTSatOn\_neonate\_v3

TA: 2:36 PM: REF Voxel size: 1.6×1.6×1.6 mmPAT: 4 Rel. SNR: 1.00 : qfl

**Properties**

|                                               |                    |
|-----------------------------------------------|--------------------|
| Prio recon                                    | Off                |
| Load images to viewer                         | On                 |
| Inline movie                                  | Off                |
| Auto store images                             | On                 |
| Load images to stamp segments                 | Off                |
| Load images to graphic segments               | Off                |
| Auto open inline display                      | Off                |
| Auto close inline display                     | Off                |
| Start measurement without further preparation | Off                |
| Wait for user to start                        | Off                |
| Start measurements                            | Single measurement |

**Routine**

|                    |                     |
|--------------------|---------------------|
| Slab group         | 1                   |
| Slabs              | 1                   |
| Dist. factor       | 20 %                |
| Position           | R6.7 P19.4 H34.5 mm |
| Orientation        | Sagittal            |
| Phase enc. dir.    | A >> P              |
| AutoAlign          | ---                 |
| Phase oversampling | 0 %                 |
| Slice oversampling | 0.0 %               |
| Slices per slab    | 88                  |
| FoV read           | 158 mm              |
| FoV phase          | 100.0 %             |
| Slice thickness    | 1.65 mm             |
| TR                 | 75.0 ms             |
| TE 1               | 2.21 ms             |
| TE 2               | 6.31 ms             |
| TE 3               | 10.41 ms            |
| Averages           | 1                   |
| Concatenations     | 1                   |
| Filter             | Prescan Normalize   |
| Coil elements      | PeH;PeN             |

**Contrast - Common**

|                   |          |
|-------------------|----------|
| TR                | 75.0 ms  |
| TE 1              | 2.21 ms  |
| TE 2              | 6.31 ms  |
| TE 3              | 10.41 ms |
| MTC               | On       |
| Magn. preparation | None     |
| Flip angle        | 5 deg    |
| Fat suppr.        | None     |
| Water suppr.      | None     |
| SWI               | Off      |

**Contrast - Dynamic**

|                 |                  |
|-----------------|------------------|
| Averages        | 1                |
| Averaging mode  | Short term       |
| Reconstruction  | Magnitude        |
| Measurements    | 1                |
| Multiple series | Each measurement |

**Resolution - Common**

|                 |         |
|-----------------|---------|
| FoV read        | 158 mm  |
| FoV phase       | 100.0 % |
| Slice thickness | 1.65 mm |
| Base resolution | 96      |

**Resolution - Common**

|                       |       |
|-----------------------|-------|
| Phase resolution      | 100 % |
| Slice resolution      | 100 % |
| Phase partial Fourier | Off   |
| Slice partial Fourier | Off   |
| Interpolation         | Off   |

**Resolution - iPAT**

|                     |            |
|---------------------|------------|
| PAT mode            | GRAPPA     |
| Accel. factor PE    | 2          |
| Ref. lines PE       | 24         |
| Accel. factor 3D    | 2          |
| Ref. lines 3D       | 24         |
| Reference scan mode | Integrated |

**Resolution - Filter Image**

|                   |     |
|-------------------|-----|
| Image Filter      | Off |
| Distortion Corr.  | Off |
| Prescan Normalize | On  |
| Unfiltered images | Off |
| Normalize         | Off |
| B1 filter         | Off |

**Resolution - Filter Rawdata**

|                   |     |
|-------------------|-----|
| Raw filter        | Off |
| Elliptical filter | Off |

**Geometry - Common**

|                    |                     |
|--------------------|---------------------|
| Slab group         | 1                   |
| Slabs              | 1                   |
| Dist. factor       | 20 %                |
| Position           | R6.7 P19.4 H34.5 mm |
| Orientation        | Sagittal            |
| Phase enc. dir.    | A >> P              |
| Slice oversampling | 0.0 %               |
| Slices per slab    | 88                  |
| FoV read           | 158 mm              |
| FoV phase          | 100.0 %             |
| Slice thickness    | 1.65 mm             |
| TR                 | 75.0 ms             |
| Multi-slice mode   | Interleaved         |
| Series             | Interleaved         |
| Concatenations     | 1                   |

**Geometry - AutoAlign**

|                     |                     |
|---------------------|---------------------|
| Slab group          | 1                   |
| Position            | R6.7 P19.4 H34.5 mm |
| Orientation         | Sagittal            |
| Phase enc. dir.     | A >> P              |
| AutoAlign           | ---                 |
| Initial Position    | R6.7 P19.4 H34.5    |
| R                   | 6.7 mm              |
| P                   | 19.4 mm             |
| H                   | 34.5 mm             |
| Initial Rotation    | 0.00 deg            |
| Initial Orientation | Sagittal            |

**Geometry - Saturation**

|                 |          |
|-----------------|----------|
| Saturation mode | Standard |
| Fat suppr.      | None     |
| Water suppr.    | None     |

**Geometry - Saturation**

|              |      |
|--------------|------|
| Special sat. | None |
|--------------|------|

**Geometry - Tim Planning Suite**

|                   |      |
|-------------------|------|
| Set-n-Go Protocol | Off  |
| Table position    | H    |
| Table position    | 0 mm |
| Inline Composing  | Off  |

**System - Miscellaneous**

|                     |                      |
|---------------------|----------------------|
| Positioning mode    | REF                  |
| Table position      | H                    |
| Table position      | 0 mm                 |
| MSMA                | S - C - T            |
| Sagittal            | R >> L               |
| Coronal             | A >> P               |
| Transversal         | F >> H               |
| Coil Combine Mode   | Sum of Squares       |
| Save uncombined     | Off                  |
| Matrix Optimization | Off                  |
| AutoAlign           | ---                  |
| Coil Select Mode    | Off - AutoCoilSelect |

**System - Adjustments**

|                          |          |
|--------------------------|----------|
| B0 Shim mode             | Standard |
| B1 Shim mode             | TrueForm |
| Adjust with body coil    | Off      |
| Confirm freq. adjustment | Off      |
| Assume Dominant Fat      | Off      |
| Assume Silicone          | Off      |
| Adjustment Tolerance     | Auto     |

**System - Adjust Volume**

|             |                     |
|-------------|---------------------|
| Position    | R6.7 P19.4 H34.5 mm |
| Orientation | Sagittal            |
| Rotation    | 0.00 deg            |
| A >> P      | 158 mm              |
| F >> H      | 158 mm              |
| R >> L      | 146 mm              |
| Reset       | Off                 |

**System - pTx Volumes**

|              |          |
|--------------|----------|
| B1 Shim mode | TrueForm |
| Excitation   | Non-sel. |

**System - Tx/Rx**

|                     |                |
|---------------------|----------------|
| Frequency 1H        | 123.244475 MHz |
| Correction factor   | 1              |
| Gain                | Low            |
| Img. Scale Cor.     | 3.000          |
| Reset               | Off            |
| ? Ref. amplitude 1H | 0.000 V        |

**Physio - Signal1**

|                 |         |
|-----------------|---------|
| 1st Signal/Mode | None    |
| TR              | 75.0 ms |
| Concatenations  | 1       |
| Segments        | 1       |

**Physio - Cardiac**

|                   |      |
|-------------------|------|
| Tagging           | None |
| Magn. preparation | None |
| Fat suppr.        | None |
| Dark blood        | Off  |

**Physio - Cardiac**

|                  |         |
|------------------|---------|
| FoV read         | 158 mm  |
| FoV phase        | 100.0 % |
| Phase resolution | 100 %   |

**Physio - PACE**

|                |     |
|----------------|-----|
| Resp. control  | Off |
| Concatenations | 1   |

**Inline - Common**

|                      |     |
|----------------------|-----|
| Subtract             | Off |
| Measurements         | 1   |
| StdDev               | Off |
| Liver registration   | Off |
| Save original images | On  |

**Inline - MIP**

|                      |     |
|----------------------|-----|
| MIP-Sag              | Off |
| MIP-Cor              | Off |
| MIP-Tra              | Off |
| MIP-Time             | Off |
| Save original images | On  |

**Inline - Soft Tissue**

|              |     |
|--------------|-----|
| Wash - In    | Off |
| Wash - Out   | Off |
| TTP          | Off |
| PEI          | Off |
| MIP - time   | Off |
| Measurements | 1   |

**Inline - Composing**

|                  |     |
|------------------|-----|
| Inline Composing | Off |
| Distortion Corr. | Off |

**Inline - MapIt**

|                      |          |
|----------------------|----------|
| Save original images | On       |
| MapIt                | None     |
| Flip angle           | 5 deg    |
| Measurements         | 1        |
| Contrasts            | 3        |
| TR                   | 75.0 ms  |
| TE 1                 | 2.21 ms  |
| TE 2                 | 6.31 ms  |
| TE 3                 | 10.41 ms |

**Sequence - Part 1**

|                     |             |
|---------------------|-------------|
| Introduction        | Off         |
| Dimension           | 3D          |
| Elliptical scanning | On          |
| Phase stabilisation | Off         |
| Asymmetric echo     | Off         |
| Contrasts           | 3           |
| Flow comp. 1        | No          |
| Readout mode        | Monopolar   |
| Multi-slice mode    | Interleaved |
| Bandwidth 1         | 350 Hz/Px   |
| Bandwidth 2         | 350 Hz/Px   |
| Bandwidth 3         | 350 Hz/Px   |

**Sequence - Part 2**

|                          |         |
|--------------------------|---------|
| Segments                 | 1       |
| Acoustic noise reduction | Active  |
| RF pulse type            | Low SAR |



**Sequence - Part 2**

|               |          |
|---------------|----------|
| Gradient mode | Normal   |
| Excitation    | Non-sel. |
| RF spoiling   | On       |

**Sequence - Assistant**

|               |      |
|---------------|------|
| Mode          | Off  |
| Allowed delay | 30 s |

\\Protocol Development\MJT\Neonate-development\PRENCOG\_neonate\MTSatOff\_neonate\_v3  
 TA: 2:36 PM: REF Voxel size: 1.6×1.6×1.6 mmPAT: 4 Rel. SNR: 1.00 : qfl

**Properties**

|                                               |                    |
|-----------------------------------------------|--------------------|
| Prio recon                                    | Off                |
| Load images to viewer                         | On                 |
| Inline movie                                  | Off                |
| Auto store images                             | On                 |
| Load images to stamp segments                 | Off                |
| Load images to graphic segments               | Off                |
| Auto open inline display                      | Off                |
| Auto close inline display                     | Off                |
| Start measurement without further preparation | Off                |
| Wait for user to start                        | Off                |
| Start measurements                            | Single measurement |

**Routine**

|                    |                     |
|--------------------|---------------------|
| Slab group         | 1                   |
| Slabs              | 1                   |
| Dist. factor       | 20 %                |
| Position           | R6.7 P19.4 H34.5 mm |
| Orientation        | Sagittal            |
| Phase enc. dir.    | A >> P              |
| AutoAlign          | ---                 |
| Phase oversampling | 0 %                 |
| Slice oversampling | 0.0 %               |
| Slices per slab    | 88                  |
| FoV read           | 158 mm              |
| FoV phase          | 100.0 %             |
| Slice thickness    | 1.65 mm             |
| TR                 | 75.0 ms             |
| TE 1               | 2.21 ms             |
| TE 2               | 6.31 ms             |
| TE 3               | 10.41 ms            |
| TE 4               | 15.00 ms            |
| TE 5               | 20.00 ms            |
| TE 6               | 25.00 ms            |
| TE 7               | 30.00 ms            |
| TE 8               | 35.00 ms            |
| TE 9               | 40.00 ms            |
| TE 10              | 45.00 ms            |
| TE 11              | 50.00 ms            |
| Averages           | 1                   |
| Concatenations     | 1                   |
| Filter             | Prescan Normalize   |
| Coil elements      | PeH;PeN             |

**Contrast - Common**

|                   |          |
|-------------------|----------|
| TR                | 75.0 ms  |
| TE 1              | 2.21 ms  |
| TE 2              | 6.31 ms  |
| TE 3              | 10.41 ms |
| TE 4              | 15.00 ms |
| TE 5              | 20.00 ms |
| TE 6              | 25.00 ms |
| TE 7              | 30.00 ms |
| TE 8              | 35.00 ms |
| TE 9              | 40.00 ms |
| TE 10             | 45.00 ms |
| TE 11             | 50.00 ms |
| MTC               | Off      |
| Magn. preparation | None     |
| Flip angle        | 5 deg    |
| Fat suppr.        | None     |

**Contrast - Common**

|              |      |
|--------------|------|
| Water suppr. | None |
| SWI          | Off  |

**Contrast - Dynamic**

|                 |                  |
|-----------------|------------------|
| Averages        | 1                |
| Averaging mode  | Short term       |
| Reconstruction  | Magn./Phase      |
| Measurements    | 1                |
| Multiple series | Each measurement |

**Resolution - Common**

|                       |         |
|-----------------------|---------|
| FoV read              | 158 mm  |
| FoV phase             | 100.0 % |
| Slice thickness       | 1.65 mm |
| Base resolution       | 96      |
| Phase resolution      | 100 %   |
| Slice resolution      | 100 %   |
| Phase partial Fourier | Off     |
| Slice partial Fourier | Off     |
| Interpolation         | Off     |

**Resolution - iPAT**

|                     |            |
|---------------------|------------|
| PAT mode            | GRAPPA     |
| Accel. factor PE    | 2          |
| Ref. lines PE       | 24         |
| Accel. factor 3D    | 2          |
| Ref. lines 3D       | 24         |
| Reference scan mode | Integrated |

**Resolution - Filter Image**

|                   |     |
|-------------------|-----|
| Image Filter      | Off |
| Distortion Corr.  | Off |
| Prescan Normalize | On  |
| Unfiltered images | Off |
| Normalize         | Off |
| B1 filter         | Off |

**Resolution - Filter Rawdata**

|                   |     |
|-------------------|-----|
| Raw filter        | Off |
| Elliptical filter | Off |

**Geometry - Common**

|                    |                     |
|--------------------|---------------------|
| Slab group         | 1                   |
| Slabs              | 1                   |
| Dist. factor       | 20 %                |
| Position           | R6.7 P19.4 H34.5 mm |
| Orientation        | Sagittal            |
| Phase enc. dir.    | A >> P              |
| Slice oversampling | 0.0 %               |
| Slices per slab    | 88                  |
| FoV read           | 158 mm              |
| FoV phase          | 100.0 %             |
| Slice thickness    | 1.65 mm             |
| TR                 | 75.0 ms             |
| Multi-slice mode   | Interleaved         |
| Series             | Interleaved         |
| Concatenations     | 1                   |

**Geometry - AutoAlign**

|            |   |
|------------|---|
| Slab group | 1 |
|------------|---|

**Geometry - AutoAlign**

|                     |                     |
|---------------------|---------------------|
| Position            | R6.7 P19.4 H34.5 mm |
| Orientation         | Sagittal            |
| Phase enc. dir.     | A >> P              |
| AutoAlign           | ---                 |
| Initial Position    | R6.7 P19.4 H34.5    |
| R                   | 6.7 mm              |
| P                   | 19.4 mm             |
| H                   | 34.5 mm             |
| Initial Rotation    | 0.00 deg            |
| Initial Orientation | Sagittal            |

**Geometry - Saturation**

|                 |          |
|-----------------|----------|
| Saturation mode | Standard |
| Fat suppr.      | None     |
| Water suppr.    | None     |
| Special sat.    | None     |

**Geometry - Tim Planning Suite**

|                   |      |
|-------------------|------|
| Set-n-Go Protocol | Off  |
| Table position    | H    |
| Table position    | 0 mm |
| Inline Composing  | Off  |

**System - Miscellaneous**

|                     |                      |
|---------------------|----------------------|
| Positioning mode    | REF                  |
| Table position      | H                    |
| Table position      | 0 mm                 |
| MSMA                | S - C - T            |
| Sagittal            | R >> L               |
| Coronal             | A >> P               |
| Transversal         | F >> H               |
| Coil Combine Mode   | Sum of Squares       |
| Save uncombined     | Off                  |
| Matrix Optimization | Off                  |
| AutoAlign           | ---                  |
| Coil Select Mode    | Off - AutoCoilSelect |

**System - Adjustments**

|                          |          |
|--------------------------|----------|
| B0 Shim mode             | Standard |
| B1 Shim mode             | TrueForm |
| Adjust with body coil    | Off      |
| Confirm freq. adjustment | Off      |
| Assume Dominant Fat      | Off      |
| Assume Silicone          | Off      |
| Adjustment Tolerance     | Auto     |

**System - Adjust Volume**

|             |                     |
|-------------|---------------------|
| Position    | R6.7 P19.4 H34.5 mm |
| Orientation | Sagittal            |
| Rotation    | 0.00 deg            |
| A >> P      | 158 mm              |
| F >> H      | 158 mm              |
| R >> L      | 146 mm              |
| Reset       | Off                 |

**System - pTx Volumes**

|              |          |
|--------------|----------|
| B1 Shim mode | TrueForm |
| Excitation   | Non-sel. |

**System - Tx/Rx**

|                   |                |
|-------------------|----------------|
| Frequency 1H      | 123.244475 MHz |
| Correction factor | 1              |
| Gain              | Low            |

**System - Tx/Rx**

|                     |         |
|---------------------|---------|
| Img. Scale Cor.     | 3.000   |
| Reset               | Off     |
| ? Ref. amplitude 1H | 0.000 V |

**Physio - Signal1**

|                 |         |
|-----------------|---------|
| 1st Signal/Mode | None    |
| TR              | 75.0 ms |
| Concatenations  | 1       |
| Segments        | 1       |

**Physio - Cardiac**

|                   |         |
|-------------------|---------|
| Tagging           | None    |
| Magn. preparation | None    |
| Fat suppr.        | None    |
| Dark blood        | Off     |
| FoV read          | 158 mm  |
| FoV phase         | 100.0 % |
| Phase resolution  | 100 %   |

**Physio - PACE**

|                |     |
|----------------|-----|
| Resp. control  | Off |
| Concatenations | 1   |

**Inline - Common**

|                      |     |
|----------------------|-----|
| Subtract             | Off |
| Measurements         | 1   |
| StdDev               | Off |
| Liver registration   | Off |
| Save original images | On  |

**Inline - MIP**

|                      |     |
|----------------------|-----|
| MIP-Sag              | Off |
| MIP-Cor              | Off |
| MIP-Tra              | Off |
| MIP-Time             | Off |
| Save original images | On  |

**Inline - Soft Tissue**

|              |     |
|--------------|-----|
| Wash - In    | Off |
| Wash - Out   | Off |
| TTP          | Off |
| PEI          | Off |
| MIP - time   | Off |
| Measurements | 1   |

**Inline - Composing**

|                  |     |
|------------------|-----|
| Inline Composing | Off |
| Distortion Corr. | Off |

**Inline - MapIt**

|                      |          |
|----------------------|----------|
| Noise threshold      | 20       |
| Save original images | On       |
| MapIt                | T2* map  |
| Flip angle           | 5 deg    |
| Measurements         | 1        |
| Contrasts            | 11       |
| TR                   | 75.0 ms  |
| TE 1                 | 2.21 ms  |
| TE 2                 | 6.31 ms  |
| TE 3                 | 10.41 ms |
| TE 4                 | 15.00 ms |
| TE 5                 | 20.00 ms |
| TE 6                 | 25.00 ms |

**Inline - MapIt**

|       |          |
|-------|----------|
| TE 7  | 30.00 ms |
| TE 8  | 35.00 ms |
| TE 9  | 40.00 ms |
| TE 10 | 45.00 ms |
| TE 11 | 50.00 ms |

**Sequence - Part 1**

|                     |             |
|---------------------|-------------|
| Introduction        | Off         |
| Dimension           | 3D          |
| Elliptical scanning | On          |
| Phase stabilisation | Off         |
| Asymmetric echo     | Off         |
| Contrasts           | 11          |
| Flow comp. 1        | No          |
| Readout mode        | Monopolar   |
| Multi-slice mode    | Interleaved |
| Bandwidth 1         | 350 Hz/Px   |
| Bandwidth 2         | 350 Hz/Px   |
| Bandwidth 3         | 350 Hz/Px   |
| Bandwidth 4         | 350 Hz/Px   |
| Bandwidth 5         | 350 Hz/Px   |
| Bandwidth 6         | 350 Hz/Px   |
| Bandwidth 7         | 350 Hz/Px   |
| Bandwidth 8         | 350 Hz/Px   |
| Bandwidth 9         | 350 Hz/Px   |
| Bandwidth 10        | 350 Hz/Px   |
| Bandwidth 11        | 350 Hz/Px   |

**Sequence - Part 2**

|                          |          |
|--------------------------|----------|
| Segments                 | 1        |
| Acoustic noise reduction | Active   |
| RF pulse type            | Low SAR  |
| Gradient mode            | Normal   |
| Excitation               | Non-sel. |
| RF spoiling              | On       |

**Sequence - Assistant**

|               |      |
|---------------|------|
| Mode          | Off  |
| Allowed delay | 30 s |

\\Protocol Development\MJT\Neonate-development\PRENCOG\_neonate\MTSatT1\_neonate\_v3

TA: 0:31 PM: REF Voxel size: 1.6×1.6×1.6 mmPAT: 4 Rel. SNR: 1.00 : qfl

**Properties**

|                                               |                    |
|-----------------------------------------------|--------------------|
| Prio recon                                    | Off                |
| Load images to viewer                         | On                 |
| Inline movie                                  | Off                |
| Auto store images                             | On                 |
| Load images to stamp segments                 | Off                |
| Load images to graphic segments               | Off                |
| Auto open inline display                      | Off                |
| Auto close inline display                     | Off                |
| Start measurement without further preparation | Off                |
| Wait for user to start                        | Off                |
| Start measurements                            | Single measurement |

**Routine**

|                    |                     |
|--------------------|---------------------|
| Slab group         | 1                   |
| Slabs              | 1                   |
| Dist. factor       | 20 %                |
| Position           | R6.7 P19.4 H34.5 mm |
| Orientation        | Sagittal            |
| Phase enc. dir.    | A >> P              |
| AutoAlign          | ---                 |
| Phase oversampling | 0 %                 |
| Slice oversampling | 0.0 %               |
| Slices per slab    | 88                  |
| FoV read           | 158 mm              |
| FoV phase          | 100.0 %             |
| Slice thickness    | 1.65 mm             |
| TR                 | 15.0 ms             |
| TE 1               | 2.21 ms             |
| TE 2               | 6.31 ms             |
| TE 3               | 10.41 ms            |
| Averages           | 1                   |
| Concatenations     | 1                   |
| Filter             | Prescan Normalize   |
| Coil elements      | PeH;PeN             |

**Contrast - Common**

|                   |          |
|-------------------|----------|
| TR                | 15.0 ms  |
| TE 1              | 2.21 ms  |
| TE 2              | 6.31 ms  |
| TE 3              | 10.41 ms |
| MTC               | Off      |
| Magn. preparation | None     |
| Flip angle        | 14 deg   |
| Fat suppr.        | None     |
| Water suppr.      | None     |
| SWI               | Off      |

**Contrast - Dynamic**

|                 |                  |
|-----------------|------------------|
| Averages        | 1                |
| Averaging mode  | Short term       |
| Reconstruction  | Magnitude        |
| Measurements    | 1                |
| Multiple series | Each measurement |

**Resolution - Common**

|                 |         |
|-----------------|---------|
| FoV read        | 158 mm  |
| FoV phase       | 100.0 % |
| Slice thickness | 1.65 mm |
| Base resolution | 96      |

**Resolution - Common**

|                       |       |
|-----------------------|-------|
| Phase resolution      | 100 % |
| Slice resolution      | 100 % |
| Phase partial Fourier | Off   |
| Slice partial Fourier | Off   |
| Interpolation         | Off   |

**Resolution - iPAT**

|                     |            |
|---------------------|------------|
| PAT mode            | GRAPPA     |
| Accel. factor PE    | 2          |
| Ref. lines PE       | 24         |
| Accel. factor 3D    | 2          |
| Ref. lines 3D       | 24         |
| Reference scan mode | Integrated |

**Resolution - Filter Image**

|                   |     |
|-------------------|-----|
| Image Filter      | Off |
| Distortion Corr.  | Off |
| Prescan Normalize | On  |
| Unfiltered images | Off |
| Normalize         | Off |
| B1 filter         | Off |

**Resolution - Filter Rawdata**

|                   |     |
|-------------------|-----|
| Raw filter        | Off |
| Elliptical filter | Off |

**Geometry - Common**

|                    |                     |
|--------------------|---------------------|
| Slab group         | 1                   |
| Slabs              | 1                   |
| Dist. factor       | 20 %                |
| Position           | R6.7 P19.4 H34.5 mm |
| Orientation        | Sagittal            |
| Phase enc. dir.    | A >> P              |
| Slice oversampling | 0.0 %               |
| Slices per slab    | 88                  |
| FoV read           | 158 mm              |
| FoV phase          | 100.0 %             |
| Slice thickness    | 1.65 mm             |
| TR                 | 15.0 ms             |
| Multi-slice mode   | Interleaved         |
| Series             | Interleaved         |
| Concatenations     | 1                   |

**Geometry - AutoAlign**

|                     |                     |
|---------------------|---------------------|
| Slab group          | 1                   |
| Position            | R6.7 P19.4 H34.5 mm |
| Orientation         | Sagittal            |
| Phase enc. dir.     | A >> P              |
| AutoAlign           | ---                 |
| Initial Position    | R6.7 P19.4 H34.5    |
| R                   | 6.7 mm              |
| P                   | 19.4 mm             |
| H                   | 34.5 mm             |
| Initial Rotation    | 0.00 deg            |
| Initial Orientation | Sagittal            |

**Geometry - Saturation**

|                 |          |
|-----------------|----------|
| Saturation mode | Standard |
| Fat suppr.      | None     |
| Water suppr.    | None     |

**Geometry - Saturation**

|              |      |
|--------------|------|
| Special sat. | None |
|--------------|------|

**Geometry - Tim Planning Suite**

|                   |      |
|-------------------|------|
| Set-n-Go Protocol | Off  |
| Table position    | H    |
| Table position    | 0 mm |
| Inline Composing  | Off  |

**System - Miscellaneous**

|                     |                      |
|---------------------|----------------------|
| Positioning mode    | REF                  |
| Table position      | H                    |
| Table position      | 0 mm                 |
| MSMA                | S - C - T            |
| Sagittal            | R >> L               |
| Coronal             | A >> P               |
| Transversal         | F >> H               |
| Coil Combine Mode   | Sum of Squares       |
| Save uncombined     | Off                  |
| Matrix Optimization | Off                  |
| AutoAlign           | ---                  |
| Coil Select Mode    | Off - AutoCoilSelect |

**System - Adjustments**

|                          |          |
|--------------------------|----------|
| B0 Shim mode             | Standard |
| B1 Shim mode             | TrueForm |
| Adjust with body coil    | Off      |
| Confirm freq. adjustment | Off      |
| Assume Dominant Fat      | Off      |
| Assume Silicone          | Off      |
| Adjustment Tolerance     | Auto     |

**System - Adjust Volume**

|             |                     |
|-------------|---------------------|
| Position    | R6.7 P19.4 H34.5 mm |
| Orientation | Sagittal            |
| Rotation    | 0.00 deg            |
| A >> P      | 158 mm              |
| F >> H      | 158 mm              |
| R >> L      | 146 mm              |
| Reset       | Off                 |

**System - pTx Volumes**

|              |          |
|--------------|----------|
| B1 Shim mode | TrueForm |
| Excitation   | Non-sel. |

**System - Tx/Rx**

|                     |                |
|---------------------|----------------|
| Frequency 1H        | 123.244475 MHz |
| Correction factor   | 1              |
| Gain                | Low            |
| Img. Scale Cor.     | 3.000          |
| Reset               | Off            |
| ? Ref. amplitude 1H | 0.000 V        |

**Physio - Signal1**

|                 |         |
|-----------------|---------|
| 1st Signal/Mode | None    |
| TR              | 15.0 ms |
| Concatenations  | 1       |
| Segments        | 1       |

**Physio - Cardiac**

|                   |      |
|-------------------|------|
| Tagging           | None |
| Magn. preparation | None |
| Fat suppr.        | None |
| Dark blood        | Off  |

**Physio - Cardiac**

|                  |         |
|------------------|---------|
| FoV read         | 158 mm  |
| FoV phase        | 100.0 % |
| Phase resolution | 100 %   |

**Physio - PACE**

|                |     |
|----------------|-----|
| Resp. control  | Off |
| Concatenations | 1   |

**Inline - Common**

|                      |     |
|----------------------|-----|
| Subtract             | Off |
| Measurements         | 1   |
| StdDev               | Off |
| Liver registration   | Off |
| Save original images | On  |

**Inline - MIP**

|                      |     |
|----------------------|-----|
| MIP-Sag              | Off |
| MIP-Cor              | Off |
| MIP-Tra              | Off |
| MIP-Time             | Off |
| Save original images | On  |

**Inline - Soft Tissue**

|              |     |
|--------------|-----|
| Wash - In    | Off |
| Wash - Out   | Off |
| TTP          | Off |
| PEI          | Off |
| MIP - time   | Off |
| Measurements | 1   |

**Inline - Composing**

|                  |     |
|------------------|-----|
| Inline Composing | Off |
| Distortion Corr. | Off |

**Inline - MapIt**

|                      |          |
|----------------------|----------|
| Save original images | On       |
| MapIt                | None     |
| Flip angle           | 14 deg   |
| Measurements         | 1        |
| Contrasts            | 3        |
| TR                   | 15.0 ms  |
| TE 1                 | 2.21 ms  |
| TE 2                 | 6.31 ms  |
| TE 3                 | 10.41 ms |

**Sequence - Part 1**

|                     |             |
|---------------------|-------------|
| Introduction        | Off         |
| Dimension           | 3D          |
| Elliptical scanning | On          |
| Phase stabilisation | Off         |
| Asymmetric echo     | Off         |
| Contrasts           | 3           |
| Flow comp. 1        | No          |
| Readout mode        | Monopolar   |
| Multi-slice mode    | Interleaved |
| Bandwidth 1         | 350 Hz/Px   |
| Bandwidth 2         | 350 Hz/Px   |
| Bandwidth 3         | 350 Hz/Px   |

**Sequence - Part 2**

|                          |         |
|--------------------------|---------|
| Segments                 | 1       |
| Acoustic noise reduction | Active  |
| RF pulse type            | Low SAR |

**Sequence - Part 2**

|               |          |
|---------------|----------|
| Gradient mode | Normal   |
| Excitation    | Non-sel. |
| RF spoiling   | On       |

**Sequence - Assistant**

|               |      |
|---------------|------|
| Mode          | Off  |
| Allowed delay | 30 s |

\\Protocol Development\MJT\Neonate-development\PRENCOG\_neonate\SWI\_v2

TA: 2:23 PM: FIX Voxel size: 0.8×0.8×3.0 mmPAT: 3 Rel. SNR: 1.00 : qswi\_r

**Properties**

|                                               |                    |
|-----------------------------------------------|--------------------|
| Prio recon                                    | Off                |
| Load images to viewer                         | On                 |
| Inline movie                                  | Off                |
| Auto store images                             | On                 |
| Load images to stamp segments                 | Off                |
| Load images to graphic segments               | Off                |
| Auto open inline display                      | Off                |
| Auto close inline display                     | Off                |
| Start measurement without further preparation | Off                |
| Wait for user to start                        | Off                |
| Start measurements                            | Single measurement |

**Routine**

|                    |                   |
|--------------------|-------------------|
| Slab group         | 1                 |
| Slabs              | 1                 |
| Dist. factor       | 20 %              |
| Position           | L0.0 A2.3 H2.2 mm |
| Orientation        | Transversal       |
| Phase enc. dir.    | R >> L            |
| AutoAlign          | ---               |
| Phase oversampling | 0 %               |
| Slice oversampling | 20.0 %            |
| Slices per slab    | 40                |
| FoV read           | 240 mm            |
| FoV phase          | 84.4 %            |
| Slice thickness    | 3.00 mm           |
| TR                 | 28.0 ms           |
| TE                 | 20.00 ms          |
| Averages           | 1                 |
| Concatenations     | 1                 |
| Filter             | Prescan Normalize |
| Coil elements      | HEA;HEP           |

**Contrast - Common**

|                   |          |
|-------------------|----------|
| TR                | 28.0 ms  |
| TE                | 20.00 ms |
| MTC               | Off      |
| Magn. preparation | None     |
| Flip angle        | 9 deg    |
| Fat suppr.        | None     |
| Water suppr.      | None     |
| SWI               | On       |

**Contrast - Dynamic**

|                 |                  |
|-----------------|------------------|
| Averages        | 1                |
| Averaging mode  | Short term       |
| Reconstruction  | Magn./Phase      |
| Measurements    | 1                |
| Multiple series | Each measurement |

**Resolution - Common**

|                       |         |
|-----------------------|---------|
| FoV read              | 240 mm  |
| FoV phase             | 84.4 %  |
| Slice thickness       | 3.00 mm |
| Base resolution       | 320     |
| Phase resolution      | 100 %   |
| Slice resolution      | 100 %   |
| Phase partial Fourier | Off     |
| Slice partial Fourier | Off     |

**Resolution - Common**

|               |     |
|---------------|-----|
| Interpolation | Off |
|---------------|-----|

**Resolution - iPAT**

|                     |            |
|---------------------|------------|
| PAT mode            | GRAPPA     |
| Accel. factor PE    | 3          |
| Ref. lines PE       | 24         |
| Accel. factor 3D    | 1          |
| Reference scan mode | Integrated |

**Resolution - Filter Image**

|                   |     |
|-------------------|-----|
| Image Filter      | Off |
| Distortion Corr.  | Off |
| Prescan Normalize | On  |
| Unfiltered images | Off |
| Normalize         | Off |
| B1 filter         | Off |

**Resolution - Filter Rawdata**

|                   |     |
|-------------------|-----|
| Raw filter        | Off |
| Elliptical filter | Off |

**Geometry - Common**

|                    |                   |
|--------------------|-------------------|
| Slab group         | 1                 |
| Slabs              | 1                 |
| Dist. factor       | 20 %              |
| Position           | L0.0 A2.3 H2.2 mm |
| Orientation        | Transversal       |
| Phase enc. dir.    | R >> L            |
| Slice oversampling | 20.0 %            |
| Slices per slab    | 40                |
| FoV read           | 240 mm            |
| FoV phase          | 84.4 %            |
| Slice thickness    | 3.00 mm           |
| TR                 | 28.0 ms           |
| Multi-slice mode   | Interleaved       |
| Series             | Interleaved       |
| Concatenations     | 1                 |

**Geometry - AutoAlign**

|                     |                   |
|---------------------|-------------------|
| Slab group          | 1                 |
| Position            | L0.0 A2.3 H2.2 mm |
| Orientation         | Transversal       |
| Phase enc. dir.     | R >> L            |
| AutoAlign           | ---               |
| Initial Position    | L0.0 A2.3 H2.2    |
| L                   | 0.0 mm            |
| A                   | 2.3 mm            |
| H                   | 2.2 mm            |
| Initial Rotation    | 89.61 deg         |
| Initial Orientation | Transversal       |

**Geometry - Saturation**

|                 |          |
|-----------------|----------|
| Saturation mode | Standard |
| Fat suppr.      | None     |
| Water suppr.    | None     |
| Special sat.    | None     |

**Geometry - Tim Planning Suite**

|                   |     |
|-------------------|-----|
| Set-n-Go Protocol | Off |
| Table position    | H   |



**Geometry - Tim Planning Suite**

|                  |      |
|------------------|------|
| Table position   | 0 mm |
| Inline Composing | Off  |

**System - Miscellaneous**

|                     |                     |
|---------------------|---------------------|
| Positioning mode    | FIX                 |
| Table position      | H                   |
| Table position      | 0 mm                |
| MSMA                | S - C - T           |
| Sagittal            | R >> L              |
| Coronal             | A >> P              |
| Transversal         | F >> H              |
| Coil Combine Mode   | Adaptive Combine    |
| Save uncombined     | Off                 |
| Matrix Optimization | Off                 |
| AutoAlign           | ---                 |
| Coil Select Mode    | On - AutoCoilSelect |

**System - Adjustments**

|                          |          |
|--------------------------|----------|
| B0 Shim mode             | Standard |
| B1 Shim mode             | TrueForm |
| Adjust with body coil    | Off      |
| Confirm freq. adjustment | Off      |
| Assume Dominant Fat      | Off      |
| Assume Silicone          | Off      |
| Adjustment Tolerance     | Auto     |

**System - Adjust Volume**

|             |                   |
|-------------|-------------------|
| Position    | L0.0 A2.3 H2.2 mm |
| Orientation | Transversal       |
| Rotation    | 89.61 deg         |
| R >> L      | 203 mm            |
| A >> P      | 240 mm            |
| F >> H      | 120 mm            |
| Reset       | Off               |

**System - pTx Volumes**

|              |           |
|--------------|-----------|
| B1 Shim mode | TrueForm  |
| Excitation   | Slab-sel. |

**System - Tx/Rx**

|                     |                |
|---------------------|----------------|
| Frequency 1H        | 123.244475 MHz |
| Correction factor   | 1              |
| Gain                | Low            |
| Img. Scale Cor.     | 3.000          |
| Reset               | Off            |
| ? Ref. amplitude 1H | 0.000 V        |

**Physio - Signal1**

|                 |         |
|-----------------|---------|
| 1st Signal/Mode | None    |
| TR              | 28.0 ms |
| Concatenations  | 1       |
| Segments        | 1       |

**Physio - Cardiac**

|                   |        |
|-------------------|--------|
| Tagging           | None   |
| Magn. preparation | None   |
| Fat suppr.        | None   |
| Dark blood        | Off    |
| FoV read          | 240 mm |
| FoV phase         | 84.4 % |
| Phase resolution  | 100 %  |

**Physio - PACE**

|                |     |
|----------------|-----|
| Resp. control  | Off |
| Concatenations | 1   |

**Inline - Common**

|                      |     |
|----------------------|-----|
| Subtract             | Off |
| Measurements         | 1   |
| StdDev               | Off |
| Liver registration   | Off |
| Save original images | On  |

**Inline - MIP**

|                      |     |
|----------------------|-----|
| MIP-Sag              | Off |
| MIP-Cor              | Off |
| MIP-Tra              | Off |
| MIP-Time             | Off |
| Save original images | On  |

**Inline - Soft Tissue**

|              |     |
|--------------|-----|
| Wash - In    | Off |
| Wash - Out   | Off |
| TTP          | Off |
| PEI          | Off |
| MIP - time   | Off |
| Measurements | 1   |

**Inline - Composing**

|                  |     |
|------------------|-----|
| Inline Composing | Off |
| Distortion Corr. | Off |

**Inline - MapIt**

|                      |          |
|----------------------|----------|
| Save original images | On       |
| MapIt                | None     |
| Flip angle           | 9 deg    |
| Measurements         | 1        |
| Contrasts            | 1        |
| TR                   | 28.0 ms  |
| TE                   | 20.00 ms |

**Sequence - Part 1**

|                     |             |
|---------------------|-------------|
| Introduction        | On          |
| Dimension           | 3D          |
| Elliptical scanning | Off         |
| Phase stabilisation | Off         |
| Asymmetric echo     | Off         |
| Contrasts           | 1           |
| Flow comp.          | Yes         |
| Multi-slice mode    | Interleaved |
| Bandwidth           | 120 Hz/Px   |

**Sequence - Part 2**

|                          |           |
|--------------------------|-----------|
| Segments                 | 1         |
| Acoustic noise reduction | Active    |
| RF pulse type            | Fast      |
| Gradient mode            | Whisper   |
| Excitation               | Slab-sel. |
| RF spoiling              | On        |

**Sequence - Assistant**

|               |      |
|---------------|------|
| Mode          | Off  |
| Allowed delay | 30 s |

\\Protocol Development\MJT\Neonate-development\PRENCOG\_neonate\t2\_blade\_dark-fluid\_tra\_v3

TA: 3:22 PM: REF Voxel size: 0.9×0.9×3.0 mmPAT: 2 Rel. SNR: 1.00 : qtirB\_rr

**Properties**

|                                               |                    |
|-----------------------------------------------|--------------------|
| Prio recon                                    | Off                |
| Load images to viewer                         | On                 |
| Inline movie                                  | Off                |
| Auto store images                             | On                 |
| Load images to stamp segments                 | On                 |
| Load images to graphic segments               | Off                |
| Auto open inline display                      | Off                |
| Auto close inline display                     | Off                |
| Start measurement without further preparation | Off                |
| Wait for user to start                        | Off                |
| Start measurements                            | Single measurement |

**Routine**

|                    |                   |
|--------------------|-------------------|
| Slice group        | 1                 |
| Slices             | 40                |
| Dist. factor       | 0 %               |
| Position           | Isocenter         |
| Orientation        | Transversal       |
| Phase enc. dir.    | R >> L            |
| AutoAlign          | ---               |
| Phase oversampling | 0.0 %             |
| FoV read           | 240 mm            |
| FoV phase          | 100.0 %           |
| Slice thickness    | 3.0 mm            |
| TR                 | 10000.0 ms        |
| TE                 | 130 ms            |
| Averages           | 1                 |
| Concatenations     | 2                 |
| Filter             | Prescan Normalize |
| Coil elements      | HEA;HEP           |

**Contrast - Common**

|                          |               |
|--------------------------|---------------|
| TR                       | 10000.0 ms    |
| TE                       | 130 ms        |
| TD                       | 0.0 ms        |
| MTC                      | Off           |
| Magn. preparation        | Slice-sel. IR |
| T1                       | 2606 ms       |
| Flip angle               | 130 deg       |
| Fat suppr.               | Fat sat.      |
| Fat sat. mode            | Strong        |
| Water suppr.             | None          |
| Restore magn.            | Off           |
| Freeze suppressed tissue | On            |

**Contrast - Dynamic**

|                 |                  |
|-----------------|------------------|
| Averages        | 1                |
| Averaging mode  | Short term       |
| Reconstruction  | Magnitude        |
| Measurements    | 1                |
| Multiple series | Each measurement |

**Resolution - Common**

|                 |         |
|-----------------|---------|
| FoV read        | 240 mm  |
| FoV phase       | 100.0 % |
| Slice thickness | 3.0 mm  |
| Base resolution | 256     |
| BLADE coverage  | 100.0 % |
| Trajectory      | BLADE   |

**Resolution - Common**

|               |     |
|---------------|-----|
| Interpolation | Off |
|---------------|-----|

**Resolution - iPAT**

|                     |            |
|---------------------|------------|
| PAT mode            | GRAPPA     |
| Accel. factor PE    | 2          |
| Ref. lines PE       | 8          |
| Reference scan mode | Integrated |

**Resolution - Filter Image**

|                   |     |
|-------------------|-----|
| Image Filter      | Off |
| Distortion Corr.  | Off |
| Prescan Normalize | On  |
| Unfiltered images | Off |
| Normalize         | Off |
| B1 filter         | Off |

**Resolution - Filter Rawdata**

|                   |     |
|-------------------|-----|
| Raw filter        | Off |
| Elliptical filter | Off |

**Geometry - Common**

|                  |             |
|------------------|-------------|
| Slice group      | 1           |
| Slices           | 40          |
| Dist. factor     | 0 %         |
| Position         | Isocenter   |
| Orientation      | Transversal |
| Phase enc. dir.  | R >> L      |
| FoV read         | 240 mm      |
| FoV phase        | 100.0 %     |
| Slice thickness  | 3.0 mm      |
| TR               | 10000.0 ms  |
| Multi-slice mode | Interleaved |
| Series           | Interleaved |
| Concatenations   | 2           |

**Geometry - AutoAlign**

|                     |             |
|---------------------|-------------|
| Slice group         | 1           |
| Position            | Isocenter   |
| Orientation         | Transversal |
| Phase enc. dir.     | R >> L      |
| AutoAlign           | ---         |
| Initial Position    | Isocenter   |
| L                   | 0.0 mm      |
| P                   | 0.0 mm      |
| H                   | 0.0 mm      |
| Initial Rotation    | 90.00 deg   |
| Initial Orientation | Transversal |

**Geometry - Saturation**

|               |            |
|---------------|------------|
| Fat suppr.    | Fat sat.   |
| Fat sat. mode | Strong     |
| Water suppr.  | None       |
| Restore magn. | Off        |
| Special sat.  | Parallel F |
| Gap           | 10 mm      |
| Thickness     | 70 mm      |

**Geometry - Navigator**

**Geometry - Tim Planning Suite**

|                   |      |
|-------------------|------|
| Set-n-Go Protocol | Off  |
| Table position    | H    |
| Table position    | 0 mm |
| Inline Composing  | Off  |

**System - Miscellaneous**

|                     |                     |
|---------------------|---------------------|
| Positioning mode    | REF                 |
| Table position      | H                   |
| Table position      | 0 mm                |
| MSMA                | S - C - T           |
| Sagittal            | R >> L              |
| Coronal             | A >> P              |
| Transversal         | F >> H              |
| Coil Combine Mode   | Adaptive Combine    |
| Save uncombined     | Off                 |
| Matrix Optimization | Off                 |
| AutoAlign           | ---                 |
| Coil Select Mode    | On - AutoCoilSelect |

**System - Adjustments**

|                          |          |
|--------------------------|----------|
| B0 Shim mode             | Standard |
| B1 Shim mode             | TrueForm |
| Adjust with body coil    | Off      |
| Confirm freq. adjustment | Off      |
| Assume Dominant Fat      | Off      |
| Assume Silicone          | Off      |
| Adjustment Tolerance     | Auto     |

**System - Adjust Volume**

|             |             |
|-------------|-------------|
| Position    | Isocenter   |
| Orientation | Transversal |
| Rotation    | 90.00 deg   |
| R >> L      | 240 mm      |
| A >> P      | 240 mm      |
| F >> H      | 120 mm      |
| Reset       | Off         |

**System - pTx Volumes**

|              |          |
|--------------|----------|
| B1 Shim mode | TrueForm |
|--------------|----------|

**System - Tx/Rx**

|                     |                |
|---------------------|----------------|
| Frequency 1H        | 123.244475 MHz |
| Correction factor   | 1              |
| Gain                | High           |
| Img. Scale Cor.     | 2.000          |
| Reset               | Off            |
| ? Ref. amplitude 1H | 0.000 V        |

**Physio - Signal1**

|                 |            |
|-----------------|------------|
| 1st Signal/Mode | None       |
| TR              | 10000.0 ms |
| Concatenations  | 2          |

**Physio - Cardiac**

|                   |               |
|-------------------|---------------|
| Magn. preparation | Slice-sel. IR |
| TI                | 2606 ms       |
| Fat suppr.        | Fat sat.      |
| Dark blood        | Off           |
| FoV read          | 240 mm        |
| FoV phase         | 100.0 %       |
| BLADE coverage    | 100.0 %       |
| Trajectory        | BLADE         |

**Physio - PACE**

|                |     |
|----------------|-----|
| Resp. control  | Off |
| Concatenations | 2   |

**Inline - Common**

|                      |     |
|----------------------|-----|
| Subtract             | Off |
| Measurements         | 1   |
| StdDev               | Off |
| Save original images | On  |

**Inline - MIP**

|                      |     |
|----------------------|-----|
| MIP-Sag              | Off |
| MIP-Cor              | Off |
| MIP-Tra              | Off |
| MIP-Time             | Off |
| Save original images | On  |

**Inline - Composing**

|                  |     |
|------------------|-----|
| Inline Composing | Off |
| Distortion Corr. | Off |

**Sequence - Part 1**

|                     |             |
|---------------------|-------------|
| Introduction        | On          |
| Dimension           | 2D          |
| Compensate T2 decay | Off         |
| Contrasts           | 1           |
| Flow comp.          | Read        |
| Multi-slice mode    | Interleaved |
| Free echo spacing   | Off         |
| Echo spacing        | 8.64 ms     |
| Bandwidth           | 362 Hz/Px   |

**Sequence - Part 2**

|                          |              |
|--------------------------|--------------|
| Define                   | Turbo factor |
| Echo trains per slice    | 9            |
| Phase correction         | Automatic    |
| Acoustic noise reduction | Active       |
| RF pulse type            | Low SAR      |
| Gradient mode            | Normal       |
| Hyperecho                | Off          |
| WARP                     | Off          |
| Motion correction        | On           |
| Red. EC sensitivity      | Off          |
| Turbo factor             | 28           |

**Sequence - Assistant**

|                |                |
|----------------|----------------|
| Mode           | Min flip angle |
| Min flip angle | 130 deg        |
| Allowed delay  | 30 s           |
