# Supplementary material for: Preterm birth as a determinant of neurodevelopment and cognition in children (PRENCOG): protocol for an exposure-based cohort study in the UK
Source: PubMed Central journal article supplement (PMC11409314; doi:10.1136/bmjopen-2024-085365), 2024-09-16
Supplement: bmjopen-14-9-s002.pdf [file bmjopen-14-9-s002.pdf]

**Table of contents**

\\Study Protocols

BRAIN

Other

TEBC\_5 year old - E161723

AAHead\_Scout\_32ch-head-coil  
t1\_mprage\_sag  
t2\_space\_sag  
t2\_blade\_dark-fluid\_tra  
DTI\_rev\_PA  
DTI\_AP  
MTSatOn\_5y  
MTSatOff\_5y  
MTSatT1w\_5y  
gre\_field\_mapping\_3mm  
ep2d\_p2\_s3\_AP\_pixar-1  
ep2d\_p2\_s3\_AP\_pixar-2  
ep2d\_p2\_s3\_AP\_sesame

\\Study Protocols\BRAIN\Other\TEBC\_5 year old - E161723\AAHead\_Scout\_32ch-head-coil

TA: 0:14 PM: REF Voxel size: 1.6×1.6×1.6 mmPAT: 3 Rel. SNR: 1.00 : fl

**Properties**

|                                               |                    |
|-----------------------------------------------|--------------------|
| Prio recon                                    | Off                |
| Load images to viewer                         | On                 |
| Inline movie                                  | Off                |
| Auto store images                             | On                 |
| Load images to stamp segments                 | On                 |
| Load images to graphic segments               | On                 |
| Auto open inline display                      | Off                |
| Auto close inline display                     | Off                |
| Start measurement without further preparation | On                 |
| Wait for user to start                        | Off                |
| Start measurements                            | Single measurement |

**Routine**

|                    |                   |
|--------------------|-------------------|
| Slab group         | 1                 |
| Slabs              | 1                 |
| Dist. factor       | 20 %              |
| Position           | Isocenter         |
| Orientation        | Sagittal          |
| Phase enc. dir.    | A >> P            |
| Phase oversampling | 0 %               |
| Slice oversampling | 0.0 %             |
| Slices per slab    | 128               |
| FoV read           | 260 mm            |
| FoV phase          | 100.0 %           |
| Slice thickness    | 1.6 mm            |
| TR                 | 3.15 ms           |
| TE                 | 1.37 ms           |
| Averages           | 1                 |
| Concatenations     | 1                 |
| Filter             | Prescan Normalize |
| Coil elements      | HEA;HEP           |

**Contrast - Common**

|            |         |
|------------|---------|
| TR         | 3.15 ms |
| TE         | 1.37 ms |
| Flip angle | 8 deg   |

**Contrast - Dynamic**

|                |            |
|----------------|------------|
| Averages       | 1          |
| Averaging mode | Short term |
| Reconstruction | Magnitude  |
| Measurements   | 1          |

**Resolution - Common**

|                       |           |
|-----------------------|-----------|
| FoV read              | 260 mm    |
| FoV phase             | 100.0 %   |
| Slice thickness       | 1.6 mm    |
| Base resolution       | 160       |
| Phase resolution      | 100 %     |
| Slice resolution      | 69 %      |
| Phase partial Fourier | 6/8       |
| Slice partial Fourier | 6/8       |
| Trajectory            | Cartesian |

**Resolution - iPAT**

|                  |        |
|------------------|--------|
| PAT mode         | GRAPPA |
| Accel. factor PE | 3      |
| Ref. lines PE    | 24     |
| Accel. factor 3D | 1      |

**Resolution - iPAT**

|                     |            |
|---------------------|------------|
| Reference scan mode | Integrated |
|---------------------|------------|

**Resolution - Filter Image**

|                   |     |
|-------------------|-----|
| Image Filter      | Off |
| Distortion Corr.  | Off |
| Prescan Normalize | On  |
| Unfiltered images | Off |
| Normalize         | Off |
| B1 filter         | Off |

**Resolution - Filter Rawdata**

|                   |     |
|-------------------|-----|
| Raw filter        | Off |
| Elliptical filter | Off |

**Geometry - Common**

|                    |            |
|--------------------|------------|
| Slab group         | 1          |
| Slabs              | 1          |
| Dist. factor       | 20 %       |
| Position           | Isocenter  |
| Orientation        | Sagittal   |
| Phase enc. dir.    | A >> P     |
| Slice oversampling | 0.0 %      |
| Slices per slab    | 128        |
| FoV read           | 260 mm     |
| FoV phase          | 100.0 %    |
| Slice thickness    | 1.6 mm     |
| TR                 | 3.15 ms    |
| Multi-slice mode   | Sequential |
| Series             | Ascending  |
| Concatenations     | 1          |

**Geometry - AutoAlign**

|                     |             |
|---------------------|-------------|
| Slab group          | 1           |
| Position            | Isocenter   |
| Orientation         | Sagittal    |
| Phase enc. dir.     | A >> P      |
| Initial Position    | Isocenter   |
| L                   | 0.0 mm      |
| P                   | 0.0 mm      |
| H                   | 0.0 mm      |
| Initial Rotation    | 0.00 deg    |
| Initial Orientation | Transversal |

**Geometry - Tim Planning Suite**

|                   |      |
|-------------------|------|
| Set-n-Go Protocol | Off  |
| Table position    | H    |
| Table position    | 0 mm |
| Inline Composing  | Off  |

**System - Miscellaneous**

|                     |                  |
|---------------------|------------------|
| Positioning mode    | REF              |
| Table position      | H                |
| Table position      | 0 mm             |
| MSMA                | S - C - T        |
| Sagittal            | R >> L           |
| Coronal             | A >> P           |
| Transversal         | F >> H           |
| Coil Combine Mode   | Adaptive Combine |
| Save uncombined     | Off              |
| Matrix Optimization | Off              |

**System - Miscellaneous**

|                  |         |
|------------------|---------|
| Coil Select Mode | Default |
|------------------|---------|

**System - Adjustments**

|                          |          |
|--------------------------|----------|
| B0 Shim mode             | Tune up  |
| B1 Shim mode             | TrueForm |
| Adjust with body coil    | Off      |
| Confirm freq. adjustment | Off      |
| Assume Dominant Fat      | Off      |
| Assume Silicone          | Off      |
| Adjustment Tolerance     | Auto     |

**System - Adjust Volume**

|             |             |
|-------------|-------------|
| Position    | Isocenter   |
| Orientation | Transversal |
| Rotation    | 0.00 deg    |
| A >> P      | 263 mm      |
| R >> L      | 350 mm      |
| F >> H      | 350 mm      |
| Reset       | Off         |

**System - pTx Volumes**

|              |          |
|--------------|----------|
| B1 Shim mode | TrueForm |
| Excitation   | Non-sel. |

**System - Tx/Rx**

|                     |                |
|---------------------|----------------|
| Frequency 1H        | 123.244475 MHz |
| Correction factor   | 1              |
| Gain                | Low            |
| Img. Scale Cor.     | 1.000          |
| Reset               | Off            |
| ? Ref. amplitude 1H | 0.000 V        |

**Physio - PACE**

|                |     |
|----------------|-----|
| Resp. control  | Off |
| Concatenations | 1   |

**Inline - Common**

|                |       |
|----------------|-------|
| Flip angle     | 8 deg |
| Measurements   | 1     |
| Time to center | 6.2 s |

**Inline - Inline**

|                      |     |
|----------------------|-----|
| Subtract             | Off |
| Measurements         | 1   |
| StdDev               | Off |
| Save original images | On  |

**Inline - MIP**

|                      |     |
|----------------------|-----|
| MIP-Sag              | Off |
| MIP-Cor              | Off |
| MIP-Tra              | Off |
| MIP-Time             | Off |
| Save original images | On  |

**Inline - Composing**

|                  |     |
|------------------|-----|
| Inline Composing | Off |
| Distortion Corr. | Off |

**Inline - MapIt**

|                      |       |
|----------------------|-------|
| Save original images | On    |
| MapIt                | None  |
| Flip angle           | 8 deg |
| Measurements         | 1     |

**Inline - MapIt**

|           |         |
|-----------|---------|
| Contrasts | 1       |
| TR        | 3.15 ms |
| TE        | 1.37 ms |

**Sequence - Part 1**

|                  |            |
|------------------|------------|
| Introduction     | On         |
| Dimension        | 3D         |
| Asymmetric echo  | Weak       |
| Contrasts        | 1          |
| Multi-slice mode | Sequential |
| Bandwidth        | 540 Hz/Px  |

**Sequence - Part 2**

|               |          |
|---------------|----------|
| RF pulse type | Fast     |
| Gradient mode | Normal   |
| Excitation    | Non-sel. |
| RF spoiling   | On       |

**Sequence - Assistant**

|      |     |
|------|-----|
| Mode | Off |
|------|-----|

\\Study Protocols\BRAIN\Other\TEBC\_5 year old - E161723\t1\_mprage\_sag

TA: 3:45 PM: FIX Voxel size: 1.0×1.0×1.0 mmPAT: 3 Rel. SNR: 1.00 : tfl

**Properties**

|                                               |                    |
|-----------------------------------------------|--------------------|
| Prio recon                                    | Off                |
| Load images to viewer                         | On                 |
| Inline movie                                  | Off                |
| Auto store images                             | On                 |
| Load images to stamp segments                 | On                 |
| Load images to graphic segments               | Off                |
| Auto open inline display                      | Off                |
| Auto close inline display                     | Off                |
| Start measurement without further preparation | Off                |
| Wait for user to start                        | Off                |
| Start measurements                            | Single measurement |

**Routine**

|                    |                   |
|--------------------|-------------------|
| Slab group         | 1                 |
| Slabs              | 1                 |
| Dist. factor       | 50 %              |
| Position           | Isocenter         |
| Orientation        | Sagittal          |
| Phase enc. dir.    | A >> P            |
| AutoAlign          | Head > Basis      |
| Phase oversampling | 0 %               |
| Slice oversampling | 0.0 %             |
| Slices per slab    | 192               |
| FoV read           | 256 mm            |
| FoV phase          | 100.0 %           |
| Slice thickness    | 1.00 mm           |
| TR                 | 2500.0 ms         |
| TE                 | 4.69 ms           |
| Averages           | 1                 |
| Concatenations     | 1                 |
| Filter             | Prescan Normalize |
| Coil elements      | HEA;HEP           |

**Contrast - Common**

|                   |                   |
|-------------------|-------------------|
| TR                | 2500.0 ms         |
| TE                | 4.69 ms           |
| Magn. preparation | Non-sel. IR       |
| T1                | 1180 ms           |
| Flip angle        | 7 deg             |
| Fat suppr.        | Water excit. fast |
| Water suppr.      | None              |

**Contrast - Dynamic**

|                 |                  |
|-----------------|------------------|
| Averages        | 1                |
| Averaging mode  | Long term        |
| Reconstruction  | Magnitude        |
| Measurements    | 1                |
| Multiple series | Each measurement |

**Resolution - Common**

|                       |         |
|-----------------------|---------|
| FoV read              | 256 mm  |
| FoV phase             | 100.0 % |
| Slice thickness       | 1.00 mm |
| Base resolution       | 256     |
| Phase resolution      | 100 %   |
| Slice resolution      | 100 %   |
| Phase partial Fourier | 7/8     |
| Slice partial Fourier | Off     |
| Interpolation         | Off     |

**Resolution - iPAT**

|                     |            |
|---------------------|------------|
| PAT mode            | GRAPPA     |
| Accel. factor PE    | 3          |
| Ref. lines PE       | 24         |
| Accel. factor 3D    | 1          |
| Reference scan mode | Integrated |

**Resolution - Filter Image**

|                   |     |
|-------------------|-----|
| Image Filter      | Off |
| Distortion Corr.  | Off |
| Prescan Normalize | On  |
| Unfiltered images | Off |
| Normalize         | Off |
| B1 filter         | Off |

**Resolution - Filter Rawdata**

|                   |     |
|-------------------|-----|
| Raw filter        | Off |
| Elliptical filter | Off |

**Geometry - Common**

|                    |             |
|--------------------|-------------|
| Slab group         | 1           |
| Slabs              | 1           |
| Dist. factor       | 50 %        |
| Position           | Isocenter   |
| Orientation        | Sagittal    |
| Phase enc. dir.    | A >> P      |
| Slice oversampling | 0.0 %       |
| Slices per slab    | 192         |
| FoV read           | 256 mm      |
| FoV phase          | 100.0 %     |
| Slice thickness    | 1.00 mm     |
| TR                 | 2500.0 ms   |
| Multi-slice mode   | Single shot |
| Series             | Interleaved |
| Concatenations     | 1           |

**Geometry - AutoAlign**

|                     |              |
|---------------------|--------------|
| Slab group          | 1            |
| Position            | Isocenter    |
| Orientation         | Sagittal     |
| Phase enc. dir.     | A >> P       |
| AutoAlign           | Head > Basis |
| Initial Position    | Isocenter    |
| L                   | 0.0 mm       |
| P                   | 0.0 mm       |
| H                   | 0.0 mm       |
| Initial Rotation    | 0.00 deg     |
| Initial Orientation | Sagittal     |

**Geometry - Navigator****Geometry - Tim Planning Suite**

|                   |      |
|-------------------|------|
| Set-n-Go Protocol | Off  |
| Table position    | H    |
| Table position    | 0 mm |
| Inline Composing  | Off  |

**System - Miscellaneous**

|                  |      |
|------------------|------|
| Positioning mode | FIX  |
| Table position   | H    |
| Table position   | 0 mm |

**System - Miscellaneous**

|                     |                     |
|---------------------|---------------------|
| MSMA                | S - C - T           |
| Sagittal            | R >> L              |
| Coronal             | A >> P              |
| Transversal         | F >> H              |
| Coil Combine Mode   | Adaptive Combine    |
| Save uncombined     | Off                 |
| Matrix Optimization | Off                 |
| AutoAlign           | Head > Basis        |
| Coil Select Mode    | On - AutoCoilSelect |

**System - Adjustments**

|                          |          |
|--------------------------|----------|
| B0 Shim mode             | Standard |
| B1 Shim mode             | TrueForm |
| Adjust with body coil    | Off      |
| Confirm freq. adjustment | Off      |
| Assume Dominant Fat      | Off      |
| Assume Silicone          | Off      |
| Adjustment Tolerance     | Auto     |

**System - Adjust Volume**

|             |           |
|-------------|-----------|
| Position    | Isocenter |
| Orientation | Sagittal  |
| Rotation    | 0.00 deg  |
| A >> P      | 256 mm    |
| F >> H      | 256 mm    |
| R >> L      | 192 mm    |
| Reset       | Off       |

**System - pTx Volumes**

|              |          |
|--------------|----------|
| B1 Shim mode | TrueForm |
| Excitation   | Non-sel. |

**System - Tx/Rx**

|                     |                |
|---------------------|----------------|
| Frequency 1H        | 123.244475 MHz |
| Correction factor   | 1              |
| Gain                | Low            |
| Img. Scale Cor.     | 2.000          |
| Reset               | Off            |
| ? Ref. amplitude 1H | 0.000 V        |

**Physio - Signal1**

|                 |           |
|-----------------|-----------|
| 1st Signal/Mode | None      |
| TR              | 2500.0 ms |
| Concatenations  | 1         |

**Physio - Cardiac**

|                   |                   |
|-------------------|-------------------|
| Magn. preparation | Non-sel. IR       |
| TI                | 1180 ms           |
| Fat suppr.        | Water excit. fast |
| Dark blood        | Off               |
| FoV read          | 256 mm            |
| FoV phase         | 100.0 %           |
| Phase resolution  | 100 %             |

**Physio - PACE**

|                |     |
|----------------|-----|
| Resp. control  | Off |
| Concatenations | 1   |

**Inline - Common**

|                      |     |
|----------------------|-----|
| Subtract             | Off |
| Measurements         | 1   |
| StdDev               | Off |
| Save original images | On  |

**Inline - MIP**

|                      |     |
|----------------------|-----|
| MIP-Sag              | Off |
| MIP-Cor              | Off |
| MIP-Tra              | Off |
| MIP-Time             | Off |
| Save original images | On  |

**Inline - Composing**

|                  |     |
|------------------|-----|
| Inline Composing | Off |
| Distortion Corr. | Off |

**Inline - MapIt**

|                      |           |
|----------------------|-----------|
| Save original images | On        |
| MapIt                | None      |
| Flip angle           | 7 deg     |
| Measurements         | 1         |
| TR                   | 2500.0 ms |
| TE                   | 4.69 ms   |

**Sequence - Part 1**

|                     |             |
|---------------------|-------------|
| Introduction        | Off         |
| Dimension           | 3D          |
| Elliptical scanning | Off         |
| Reordering          | Linear      |
| Asymmetric echo     | Off         |
| Flow comp.          | No          |
| Multi-slice mode    | Single shot |
| Echo spacing        | 12 ms       |
| Bandwidth           | 140 Hz/Px   |

**Sequence - Part 2**

|                         |          |
|-------------------------|----------|
| RF pulse type           | Fast     |
| Gradient mode           | Whisper  |
| Excitation              | Non-sel. |
| RF spoiling             | On       |
| Incr. Gradient spoiling | Off      |
| Turbo factor            | 192      |

**Sequence - Assistant**

|      |     |
|------|-----|
| Mode | Off |
|------|-----|

|                                                                             |  |
|-----------------------------------------------------------------------------|--|
| <b>\\Study Protocols\BRAIN\Other\TEBC_5 year old - E161723\l2_space_sag</b> |  |
| TA: 3:30 PM: FIX Voxel size: 0.9×0.9×0.9 mmPAT: 4 Rel. SNR: 1.00 : spcR     |  |

**Properties**

|                                               |                    |
|-----------------------------------------------|--------------------|
| Prio recon                                    | Off                |
| Load images to viewer                         | On                 |
| Inline movie                                  | Off                |
| Auto store images                             | On                 |
| Load images to stamp segments                 | Off                |
| Load images to graphic segments               | Off                |
| Auto open inline display                      | Off                |
| Auto close inline display                     | Off                |
| Start measurement without further preparation | Off                |
| Wait for user to start                        | Off                |
| Start measurements                            | Single measurement |

**Routine**

|                    |                               |
|--------------------|-------------------------------|
| Slab group         | 1                             |
| Slabs              | 1                             |
| Position           | Isocenter                     |
| Orientation        | Sagittal                      |
| Phase enc. dir.    | A >> P                        |
| AutoAlign          | Head > Basis                  |
| Phase oversampling | 0 %                           |
| Slice oversampling | 0.0 %                         |
| Slices per slab    | 192                           |
| FoV read           | 230 mm                        |
| FoV phase          | 100.0 %                       |
| Slice thickness    | 0.90 mm                       |
| TR                 | 3200 ms                       |
| TE                 | 407 ms                        |
| Averages           | 1.4                           |
| Concatenations     | 1                             |
| Filter             | Raw filter, Prescan Normalize |
| Coil elements      | HEA;HEP                       |

**Contrast - Common**

|                   |         |
|-------------------|---------|
| TR                | 3200 ms |
| TE                | 407 ms  |
| MTC               | Off     |
| Magn. preparation | None    |
| Fat suppr.        | None    |
| Blood suppr.      | Off     |
| Restore magn.     | On      |

**Contrast - Dynamic**

|                 |                  |
|-----------------|------------------|
| Averages        | 1.4              |
| Reconstruction  | Magnitude        |
| Measurements    | 1                |
| Multiple series | Each measurement |

**Resolution - Common**

|                       |         |
|-----------------------|---------|
| FoV read              | 230 mm  |
| FoV phase             | 100.0 % |
| Slice thickness       | 0.90 mm |
| Base resolution       | 256     |
| Phase resolution      | 100 %   |
| Slice resolution      | 100 %   |
| Phase partial Fourier | Allowed |
| Slice partial Fourier | Off     |
| Interpolation         | Off     |

**Resolution - iPAT**

|                     |            |
|---------------------|------------|
| PAT mode            | GRAPPA     |
| Accel. factor PE    | 2          |
| Ref. lines PE       | 24         |
| Accel. factor 3D    | 2          |
| Ref. lines 3D       | 24         |
| Reference scan mode | Integrated |

**Resolution - Filter Image**

|                   |     |
|-------------------|-----|
| Image Filter      | Off |
| Distortion Corr.  | Off |
| Prescan Normalize | On  |
| Unfiltered images | Off |
| Normalize         | Off |
| B1 filter         | Off |

**Resolution - Filter Rawdata**

|                   |     |
|-------------------|-----|
| Raw filter        | On  |
| Elliptical filter | Off |

**Geometry - Common**

|                    |             |
|--------------------|-------------|
| Slab group         | 1           |
| Slabs              | 1           |
| Position           | Isocenter   |
| Orientation        | Sagittal    |
| Phase enc. dir.    | A >> P      |
| Slice oversampling | 0.0 %       |
| Slices per slab    | 192         |
| FoV read           | 230 mm      |
| FoV phase          | 100.0 %     |
| Slice thickness    | 0.90 mm     |
| TR                 | 3200 ms     |
| Series             | Interleaved |
| Concatenations     | 1           |

**Geometry - AutoAlign**

|                     |              |
|---------------------|--------------|
| Slab group          | 1            |
| Position            | Isocenter    |
| Orientation         | Sagittal     |
| Phase enc. dir.     | A >> P       |
| AutoAlign           | Head > Basis |
| Initial Position    | Isocenter    |
| L                   | 0.0 mm       |
| P                   | 0.0 mm       |
| H                   | 0.0 mm       |
| Initial Rotation    | 0.00 deg     |
| Initial Orientation | Sagittal     |

**Geometry - Saturation**

|               |      |
|---------------|------|
| Fat suppr.    | None |
| Restore magn. | On   |
| Special sat.  | None |

**Geometry - Navigator**

**Geometry - Tim Planning Suite**

|                   |      |
|-------------------|------|
| Set-n-Go Protocol | Off  |
| Table position    | H    |
| Table position    | 0 mm |
| Inline Composing  | Off  |

**System - Miscellaneous**

|                     |                      |
|---------------------|----------------------|
| Positioning mode    | FIX                  |
| Table position      | H                    |
| Table position      | 0 mm                 |
| MSMA                | S - C - T            |
| Sagittal            | R >> L               |
| Coronal             | A >> P               |
| Transversal         | F >> H               |
| Coil Combine Mode   | Adaptive Combine     |
| Save uncombined     | Off                  |
| Matrix Optimization | Off                  |
| AutoAlign           | Head > Basis         |
| Coil Select Mode    | Off - AutoCoilSelect |

**System - Adjustments**

|                          |          |
|--------------------------|----------|
| B0 Shim mode             | Tune up  |
| B1 Shim mode             | TrueForm |
| Adjust with body coil    | Off      |
| Confirm freq. adjustment | Off      |
| Assume Dominant Fat      | Off      |
| Assume Silicone          | Off      |
| Adjustment Tolerance     | Auto     |

**System - Adjust Volume**

|             |             |
|-------------|-------------|
| Position    | Isocenter   |
| Orientation | Transversal |
| Rotation    | 0.00 deg    |
| A >> P      | 263 mm      |
| R >> L      | 350 mm      |
| F >> H      | 350 mm      |
| Reset       | Off         |

**System - pTx Volumes**

|              |          |
|--------------|----------|
| B1 Shim mode | TrueForm |
| Excitation   | Non-sel. |

**System - Tx/Rx**

|                     |                |
|---------------------|----------------|
| Frequency 1H        | 123.244475 MHz |
| Correction factor   | 1              |
| Gain                | High           |
| Img. Scale Cor.     | 2.000          |
| Reset               | Off            |
| ? Ref. amplitude 1H | 0.000 V        |

**Physio - Signal1**

|                 |         |
|-----------------|---------|
| 1st Signal/Mode | None    |
| Trigger delay   | 0 ms    |
| TR              | 3200 ms |
| Concatenations  | 1       |

**Physio - Cardiac**

|                   |         |
|-------------------|---------|
| Magn. preparation | None    |
| Fat suppr.        | None    |
| Dark blood        | Off     |
| FoV read          | 230 mm  |
| FoV phase         | 100.0 % |
| Phase resolution  | 100 %   |

**Physio - PACE**

|                |     |
|----------------|-----|
| Resp. control  | Off |
| Concatenations | 1   |

**Inline - Common**

|          |     |
|----------|-----|
| Subtract | Off |
|----------|-----|

**Inline - Common**

|                      |     |
|----------------------|-----|
| Measurements         | 1   |
| StdDev               | Off |
| Save original images | On  |

**Inline - MIP**

|                      |     |
|----------------------|-----|
| MIP-Sag              | Off |
| MIP-Cor              | Off |
| MIP-Tra              | Off |
| MIP-Time             | Off |
| Save original images | On  |

**Inline - Composing**

|                  |     |
|------------------|-----|
| Inline Composing | Off |
| Distortion Corr. | Off |

**Sequence - Part 1**

|                     |           |
|---------------------|-----------|
| Introduction        | On        |
| Dimension           | 3D        |
| Elliptical scanning | Off       |
| Reordering          | Linear    |
| Flow comp.          | No        |
| Echo spacing        | 4.52 ms   |
| Adiabatic-mode      | Off       |
| Bandwidth           | 592 Hz/Px |

**Sequence - Part 2**

|                     |          |
|---------------------|----------|
| Echo train duration | 1049 ms  |
| RF pulse type       | Low SAR  |
| Gradient mode       | Whisper  |
| Excitation          | Non-sel. |
| Flip angle mode     | T2 var   |
| Turbo factor        | 282      |

**Sequence - Assistant**

|               |      |
|---------------|------|
| Allowed delay | 30 s |
|---------------|------|

\\Study Protocols\BRAIN\Other\TEBC\_5 year old - E161723\t2\_blade\_dark-fluid\_tra

TA: 3:12 PM: FIX Voxel size: 0.9×0.9×3.0 mmPAT: 2 Rel. SNR: 1.00 : tirB\_rr

**Properties**

|                                               |                    |
|-----------------------------------------------|--------------------|
| Prio recon                                    | Off                |
| Load images to viewer                         | On                 |
| Inline movie                                  | Off                |
| Auto store images                             | On                 |
| Load images to stamp segments                 | On                 |
| Load images to graphic segments               | Off                |
| Auto open inline display                      | Off                |
| Auto close inline display                     | Off                |
| Start measurement without further preparation | Off                |
| Wait for user to start                        | Off                |
| Start measurements                            | Single measurement |

**Routine**

|                    |                   |
|--------------------|-------------------|
| Slice group        | 1                 |
| Slices             | 48                |
| Dist. factor       | 0 %               |
| Position           | Isocenter         |
| Orientation        | Transversal       |
| Phase enc. dir.    | R >> L            |
| AutoAlign          | Head > Brain      |
| Phase oversampling | 0.0 %             |
| FoV read           | 240 mm            |
| FoV phase          | 100.0 %           |
| Slice thickness    | 3.0 mm            |
| TR                 | 9500.0 ms         |
| TE                 | 124 ms            |
| Averages           | 1                 |
| Concatenations     | 2                 |
| Filter             | Prescan Normalize |
| Coil elements      | HEA;HEP           |

**Contrast - Common**

|                          |               |
|--------------------------|---------------|
| TR                       | 9500.0 ms     |
| TE                       | 124 ms        |
| TD                       | 0.0 ms        |
| MTC                      | Off           |
| Magn. preparation        | Slice-sel. IR |
| TI                       | 2556 ms       |
| Flip angle               | 130 deg       |
| Fat suppr.               | Fat sat.      |
| Fat sat. mode            | Strong        |
| Water suppr.             | None          |
| Restore magn.            | Off           |
| Freeze suppressed tissue | On            |

**Contrast - Dynamic**

|                 |                  |
|-----------------|------------------|
| Averages        | 1                |
| Averaging mode  | Short term       |
| Reconstruction  | Magnitude        |
| Measurements    | 1                |
| Multiple series | Each measurement |

**Resolution - Common**

|                 |         |
|-----------------|---------|
| FoV read        | 240 mm  |
| FoV phase       | 100.0 % |
| Slice thickness | 3.0 mm  |
| Base resolution | 256     |
| BLADE coverage  | 100.0 % |
| Trajectory      | BLADE   |

**Resolution - Common**

|               |     |
|---------------|-----|
| Interpolation | Off |
|---------------|-----|

**Resolution - iPAT**

|                     |            |
|---------------------|------------|
| PAT mode            | GRAPPA     |
| Accel. factor PE    | 2          |
| Ref. lines PE       | 8          |
| Reference scan mode | Integrated |

**Resolution - Filter Image**

|                   |     |
|-------------------|-----|
| Image Filter      | Off |
| Distortion Corr.  | Off |
| Prescan Normalize | On  |
| Unfiltered images | Off |
| Normalize         | Off |
| B1 filter         | Off |

**Resolution - Filter Rawdata**

|                   |     |
|-------------------|-----|
| Raw filter        | Off |
| Elliptical filter | Off |

**Geometry - Common**

|                  |             |
|------------------|-------------|
| Slice group      | 1           |
| Slices           | 48          |
| Dist. factor     | 0 %         |
| Position         | Isocenter   |
| Orientation      | Transversal |
| Phase enc. dir.  | R >> L      |
| FoV read         | 240 mm      |
| FoV phase        | 100.0 %     |
| Slice thickness  | 3.0 mm      |
| TR               | 9500.0 ms   |
| Multi-slice mode | Interleaved |
| Series           | Interleaved |
| Concatenations   | 2           |

**Geometry - AutoAlign**

|                     |              |
|---------------------|--------------|
| Slice group         | 1            |
| Position            | Isocenter    |
| Orientation         | Transversal  |
| Phase enc. dir.     | R >> L       |
| AutoAlign           | Head > Brain |
| Initial Position    | Isocenter    |
| L                   | 0.0 mm       |
| P                   | 0.0 mm       |
| H                   | 0.0 mm       |
| Initial Rotation    | 90.00 deg    |
| Initial Orientation | Transversal  |

**Geometry - Saturation**

|               |            |
|---------------|------------|
| Fat suppr.    | Fat sat.   |
| Fat sat. mode | Strong     |
| Water suppr.  | None       |
| Restore magn. | Off        |
| Special sat.  | Parallel F |
| Gap           | 10 mm      |
| Thickness     | 70 mm      |

**Geometry - Navigator**



**Geometry - Tim Planning Suite**

|                   |      |
|-------------------|------|
| Set-n-Go Protocol | Off  |
| Table position    | H    |
| Table position    | 0 mm |
| Inline Composing  | Off  |

**System - Miscellaneous**

|                     |                      |
|---------------------|----------------------|
| Positioning mode    | FIX                  |
| Table position      | H                    |
| Table position      | 0 mm                 |
| MSMA                | S - C - T            |
| Sagittal            | R >> L               |
| Coronal             | A >> P               |
| Transversal         | F >> H               |
| Coil Combine Mode   | Adaptive Combine     |
| Save uncombined     | Off                  |
| Matrix Optimization | Off                  |
| AutoAlign           | Head > Brain         |
| Coil Select Mode    | Off - AutoCoilSelect |

**System - Adjustments**

|                          |          |
|--------------------------|----------|
| B0 Shim mode             | Standard |
| B1 Shim mode             | TrueForm |
| Adjust with body coil    | Off      |
| Confirm freq. adjustment | Off      |
| Assume Dominant Fat      | Off      |
| Assume Silicone          | Off      |
| Adjustment Tolerance     | Auto     |

**System - Adjust Volume**

|             |             |
|-------------|-------------|
| Position    | Isocenter   |
| Orientation | Transversal |
| Rotation    | 90.00 deg   |
| R >> L      | 240 mm      |
| A >> P      | 240 mm      |
| F >> H      | 144 mm      |
| Reset       | Off         |

**System - pTx Volumes**

|              |          |
|--------------|----------|
| B1 Shim mode | TrueForm |
|--------------|----------|

**System - Tx/Rx**

|                     |                |
|---------------------|----------------|
| Frequency 1H        | 123.244475 MHz |
| Correction factor   | 1              |
| Gain                | High           |
| Img. Scale Cor.     | 2.000          |
| Reset               | Off            |
| ? Ref. amplitude 1H | 0.000 V        |

**Physio - Signal1**

|                 |           |
|-----------------|-----------|
| 1st Signal/Mode | None      |
| TR              | 9500.0 ms |
| Concatenations  | 2         |

**Physio - Cardiac**

|                   |               |
|-------------------|---------------|
| Magn. preparation | Slice-sel. IR |
| TI                | 2556 ms       |
| Fat suppr.        | Fat sat.      |
| Dark blood        | Off           |
| FoV read          | 240 mm        |
| FoV phase         | 100.0 %       |
| BLADE coverage    | 100.0 %       |
| Trajectory        | BLADE         |

**Physio - PACE**

|                |     |
|----------------|-----|
| Resp. control  | Off |
| Concatenations | 2   |

**Inline - Common**

|                      |     |
|----------------------|-----|
| Subtract             | Off |
| Measurements         | 1   |
| StdDev               | Off |
| Save original images | On  |

**Inline - MIP**

|                      |     |
|----------------------|-----|
| MIP-Sag              | Off |
| MIP-Cor              | Off |
| MIP-Tra              | Off |
| MIP-Time             | Off |
| Save original images | On  |

**Inline - Composing**

|                  |     |
|------------------|-----|
| Inline Composing | Off |
| Distortion Corr. | Off |

**Sequence - Part 1**

|                     |             |
|---------------------|-------------|
| Introduction        | On          |
| Dimension           | 2D          |
| Compensate T2 decay | Off         |
| Contrasts           | 1           |
| Flow comp.          | Read        |
| Multi-slice mode    | Interleaved |
| Free echo spacing   | Off         |
| Echo spacing        | 8.26 ms     |
| Bandwidth           | 362 Hz/Px   |

**Sequence - Part 2**

|                          |              |
|--------------------------|--------------|
| Define                   | Turbo factor |
| Echo trains per slice    | 9            |
| Phase correction         | Automatic    |
| Acoustic noise reduction | None         |
| RF pulse type            | Low SAR      |
| Gradient mode            | Fast         |
| Hyperecho                | Off          |
| WARP                     | Off          |
| Motion correction        | On           |
| Red. EC sensitivity      | Off          |
| Turbo factor             | 28           |

**Sequence - Assistant**

|                |                |
|----------------|----------------|
| Mode           | Min flip angle |
| Min flip angle | 130 deg        |
| Allowed delay  | 30 s           |

\\Study Protocols\BRAIN\Other\TEBC\_5 year old - E161723\DTI\_rev\_PA

TA: 0:29 PM: REF Voxel size: 2.0×2.0×2.0 mmPAT: 6 Rel. SNR: 1.00 : epse

**Properties**

|                                               |                    |
|-----------------------------------------------|--------------------|
| Prio recon                                    | Off                |
| Load images to viewer                         | On                 |
| Inline movie                                  | Off                |
| Auto store images                             | On                 |
| Load images to stamp segments                 | Off                |
| Load images to graphic segments               | Off                |
| Auto open inline display                      | Off                |
| Auto close inline display                     | Off                |
| Start measurement without further preparation | Off                |
| Wait for user to start                        | Off                |
| Start measurements                            | Single measurement |

**Routine**

|                    |                                  |
|--------------------|----------------------------------|
| Slice group        | 1                                |
| Slices             | 63                               |
| Dist. factor       | 0 %                              |
| Position           | L0.7 P3.0 H31.9 mm               |
| Orientation        | Transversal                      |
| Phase enc. dir.    | P >> A                           |
| AutoAlign          | ---                              |
| Phase oversampling | 0 %                              |
| FoV read           | 256 mm                           |
| FoV phase          | 100.0 %                          |
| Slice thickness    | 2.0 mm                           |
| TR                 | 2800 ms                          |
| TE                 | 82.0 ms                          |
| Concatenations     | 1                                |
| Filter             | Raw filter, Prescan<br>Normalize |
| Coil elements      | HEA;HEP                          |

**Contrast - Common**

|                   |          |
|-------------------|----------|
| TR                | 2800 ms  |
| TE                | 82.0 ms  |
| MTC               | Off      |
| Magn. preparation | None     |
| Fat suppr.        | Fat sat. |
| Fat sat. mode     | Strong   |

**Contrast - Dynamic**

|                 |           |
|-----------------|-----------|
| Averaging mode  | Long term |
| Reconstruction  | Magnitude |
| Measurements    | 1         |
| Delay in TR     | 0 ms      |
| Multiple series | Off       |

**Resolution - Common**

|                       |         |
|-----------------------|---------|
| FoV read              | 256 mm  |
| FoV phase             | 100.0 % |
| Slice thickness       | 2.0 mm  |
| Base resolution       | 128     |
| Phase resolution      | 100 %   |
| Phase partial Fourier | 7/8     |
| Interpolation         | Off     |

**Resolution - iPAT**

|                  |              |
|------------------|--------------|
| Accel. mode      | Slice accel. |
| Accel. factor PE | 2            |
| Ref. lines PE    | 40           |

**Resolution - iPAT**

|                     |              |
|---------------------|--------------|
| Accel. factor slice | 3            |
| Reference scan mode | EPI/separate |

**Resolution - Filter Image**

|                     |     |
|---------------------|-----|
| Distortion Corr.    | Off |
| Prescan Normalize   | On  |
| Dynamic Field Corr. | Off |

**Resolution - Filter Rawdata**

|                   |     |
|-------------------|-----|
| Raw filter        | On  |
| Elliptical filter | Off |

**Geometry - Common**

|                  |                    |
|------------------|--------------------|
| Slice group      | 1                  |
| Slices           | 63                 |
| Dist. factor     | 0 %                |
| Position         | L0.7 P3.0 H31.9 mm |
| Orientation      | Transversal        |
| Phase enc. dir.  | P >> A             |
| FoV read         | 256 mm             |
| FoV phase        | 100.0 %            |
| Slice thickness  | 2.0 mm             |
| TR               | 2800 ms            |
| Multi-slice mode | Interleaved        |
| Series           | Interleaved        |
| Concatenations   | 1                  |

**Geometry - AutoAlign**

|                     |                    |
|---------------------|--------------------|
| Slice group         | 1                  |
| Position            | L0.7 P3.0 H31.9 mm |
| Orientation         | Transversal        |
| Phase enc. dir.     | P >> A             |
| AutoAlign           | ---                |
| Initial Position    | L0.7 P3.0 H31.9    |
| L                   | 0.7 mm             |
| P                   | 3.0 mm             |
| H                   | 31.9 mm            |
| Initial Rotation    | -180.00 deg        |
| Initial Orientation | Transversal        |

**Geometry - Saturation**

|               |          |
|---------------|----------|
| Fat suppr.    | Fat sat. |
| Fat sat. mode | Strong   |
| Special sat.  | None     |

**Geometry - Navigator****Geometry - Tim Planning Suite**

|                   |      |
|-------------------|------|
| Set-n-Go Protocol | Off  |
| Table position    | H    |
| Table position    | 0 mm |
| Inline Composing  | Off  |

**System - Miscellaneous**

|                  |           |
|------------------|-----------|
| Positioning mode | REF       |
| Table position   | H         |
| Table position   | 0 mm      |
| MSMA             | S - C - T |
| Sagittal         | R >> L    |

**System - Miscellaneous**

|                     |                     |
|---------------------|---------------------|
| Coronal             | A >> P              |
| Transversal         | H >> F              |
| Coil Combine Mode   | Adaptive Combine    |
| Matrix Optimization | Performance         |
| AutoAlign           | ---                 |
| Coil Select Mode    | On - AutoCoilSelect |

**System - Adjustments**

|                          |          |
|--------------------------|----------|
| B0 Shim mode             | Standard |
| B1 Shim mode             | TrueForm |
| Adjust with body coil    | Off      |
| Confirm freq. adjustment | Off      |
| Assume Dominant Fat      | Off      |
| Assume Silicone          | Off      |
| Adjustment Tolerance     | Auto     |

**System - Adjust Volume**

|             |                    |
|-------------|--------------------|
| Position    | L0.7 P3.0 H31.9 mm |
| Orientation | Transversal        |
| Rotation    | 180.00 deg         |
| A >> P      | 256 mm             |
| R >> L      | 256 mm             |
| F >> H      | 126 mm             |
| Reset       | Off                |

**System - pTx Volumes**

|              |          |
|--------------|----------|
| B1 Shim mode | TrueForm |
| Excitation   | Standard |

**System - Tx/Rx**

|                     |                |
|---------------------|----------------|
| Frequency 1H        | 123.244475 MHz |
| Correction factor   | 1              |
| Gain                | High           |
| Img. Scale Cor.     | 2.000          |
| Reset               | Off            |
| ? Ref. amplitude 1H | 0.000 V        |

**Physio - Signal1**

|                 |         |
|-----------------|---------|
| 1st Signal/Mode | None    |
| TR              | 2800 ms |
| Concatenations  | 1       |

**Physio - PACE**

|                |     |
|----------------|-----|
| Resp. control  | Off |
| Concatenations | 1   |

**Diff - Neuro**

|                       |                     |
|-----------------------|---------------------|
| Diffusion mode        | Free                |
| Diff. directions      | 151                 |
| Diffusion Scheme      | Monopolar           |
| Diff. weightings      | 1                   |
| b-value               | 0 s/mm <sup>2</sup> |
| b-value               | 3                   |
| Diff. weighted images | On                  |
| Trace weighted images | Off                 |
| ADC maps              | Off                 |
| FA maps               | Off                 |
| Mosaic                | Off                 |
| Tensor                | Off                 |
| Noise level           | 40                  |

**Diff - Body**

|                |      |
|----------------|------|
| Diffusion mode | Free |
|----------------|------|

**Diff - Body**

|                       |                     |
|-----------------------|---------------------|
| Diff. directions      | 151                 |
| Diffusion Scheme      | Monopolar           |
| Diff. weightings      | 1                   |
| b-value               | 0 s/mm <sup>2</sup> |
| b-value               | 3                   |
| Diff. weighted images | On                  |
| Trace weighted images | Off                 |
| ADC maps              | Off                 |
| Exponential ADC Maps  | Off                 |
| FA maps               | Off                 |
| Invert Gray Scale     | Off                 |
| Calculated Image      | Off                 |
| b-Value >=            | 0 s/mm <sup>2</sup> |
| Noise level           | 40                  |

**Diff - Composing**

|                  |     |
|------------------|-----|
| Inline Composing | Off |
| Distortion Corr. | Off |

**Sequence - Part 1**

|                   |             |
|-------------------|-------------|
| Introduction      | On          |
| Optimization      | None        |
| Multi-slice mode  | Interleaved |
| Free echo spacing | Off         |
| Echo spacing      | 0.93 ms     |
| Bandwidth         | 1446 Hz/Px  |

**Sequence - Part 2**

|               |          |
|---------------|----------|
| EPI factor    | 128      |
| RF pulse type | Low SAR  |
| Gradient mode | Normal   |
| Excitation    | Standard |

**Sequence - pTX Pulses**

\\Study Protocols\BRAIN\Other\TEBC\_5 year old - E161723\DTI\_AP

TA: 7:26 PM: REF Voxel size: 2.0×2.0×2.0 mmPAT: 6 Rel. SNR: 1.00 : epse

**Properties**

|                                               |                    |
|-----------------------------------------------|--------------------|
| Prio recon                                    | Off                |
| Load images to viewer                         | On                 |
| Inline movie                                  | Off                |
| Auto store images                             | On                 |
| Load images to stamp segments                 | Off                |
| Load images to graphic segments               | Off                |
| Auto open inline display                      | Off                |
| Auto close inline display                     | Off                |
| Start measurement without further preparation | Off                |
| Wait for user to start                        | Off                |
| Start measurements                            | Single measurement |

**Routine**

|                    |                                  |
|--------------------|----------------------------------|
| Slice group        | 1                                |
| Slices             | 63                               |
| Dist. factor       | 0 %                              |
| Position           | L0.7 P3.0 H31.9 mm               |
| Orientation        | Transversal                      |
| Phase enc. dir.    | A >> P                           |
| AutoAlign          | ---                              |
| Phase oversampling | 0 %                              |
| FoV read           | 256 mm                           |
| FoV phase          | 100.0 %                          |
| Slice thickness    | 2.0 mm                           |
| TR                 | 2800 ms                          |
| TE                 | 82.0 ms                          |
| Averages           | 1                                |
| Concatenations     | 1                                |
| Filter             | Raw filter, Prescan<br>Normalize |
| Coil elements      | HEA;HEP                          |

**Contrast - Common**

|                   |          |
|-------------------|----------|
| TR                | 2800 ms  |
| TE                | 82.0 ms  |
| MTC               | Off      |
| Magn. preparation | None     |
| Fat suppr.        | Fat sat. |
| Fat sat. mode     | Strong   |

**Contrast - Dynamic**

|                 |           |
|-----------------|-----------|
| Averages        | 1         |
| Averaging mode  | Long term |
| Reconstruction  | Magnitude |
| Measurements    | 1         |
| Delay in TR     | 0 ms      |
| Multiple series | Off       |

**Resolution - Common**

|                       |         |
|-----------------------|---------|
| FoV read              | 256 mm  |
| FoV phase             | 100.0 % |
| Slice thickness       | 2.0 mm  |
| Base resolution       | 128     |
| Phase resolution      | 100 %   |
| Phase partial Fourier | 7/8     |
| Interpolation         | Off     |

**Resolution - iPAT**

|             |              |
|-------------|--------------|
| Accel. mode | Slice accel. |
|-------------|--------------|

**Resolution - iPAT**

|                     |              |
|---------------------|--------------|
| Accel. factor PE    | 2            |
| Ref. lines PE       | 40           |
| Accel. factor slice | 3            |
| Reference scan mode | EPI/separate |

**Resolution - Filter Image**

|                     |     |
|---------------------|-----|
| Distortion Corr.    | Off |
| Prescan Normalize   | On  |
| Dynamic Field Corr. | Off |

**Resolution - Filter Rawdata**

|                   |     |
|-------------------|-----|
| Raw filter        | On  |
| Elliptical filter | Off |

**Geometry - Common**

|                  |                    |
|------------------|--------------------|
| Slice group      | 1                  |
| Slices           | 63                 |
| Dist. factor     | 0 %                |
| Position         | L0.7 P3.0 H31.9 mm |
| Orientation      | Transversal        |
| Phase enc. dir.  | A >> P             |
| FoV read         | 256 mm             |
| FoV phase        | 100.0 %            |
| Slice thickness  | 2.0 mm             |
| TR               | 2800 ms            |
| Multi-slice mode | Interleaved        |
| Series           | Interleaved        |
| Concatenations   | 1                  |

**Geometry - AutoAlign**

|                     |                    |
|---------------------|--------------------|
| Slice group         | 1                  |
| Position            | L0.7 P3.0 H31.9 mm |
| Orientation         | Transversal        |
| Phase enc. dir.     | A >> P             |
| AutoAlign           | ---                |
| Initial Position    | L0.7 P3.0 H31.9    |
| L                   | 0.7 mm             |
| P                   | 3.0 mm             |
| H                   | 31.9 mm            |
| Initial Rotation    | 0.00 deg           |
| Initial Orientation | Transversal        |

**Geometry - Saturation**

|               |          |
|---------------|----------|
| Fat suppr.    | Fat sat. |
| Fat sat. mode | Strong   |
| Special sat.  | None     |

**Geometry - Navigator****Geometry - Tim Planning Suite**

|                   |      |
|-------------------|------|
| Set-n-Go Protocol | Off  |
| Table position    | H    |
| Table position    | 0 mm |
| Inline Composing  | Off  |

**System - Miscellaneous**

|                  |      |
|------------------|------|
| Positioning mode | REF  |
| Table position   | H    |
| Table position   | 0 mm |

**System - Miscellaneous**

|                     |                     |
|---------------------|---------------------|
| MSMA                | S - C - T           |
| Sagittal            | R >> L              |
| Coronal             | A >> P              |
| Transversal         | H >> F              |
| Coil Combine Mode   | Adaptive Combine    |
| Matrix Optimization | Performance         |
| AutoAlign           | ---                 |
| Coil Select Mode    | On - AutoCoilSelect |

**System - Adjustments**

|                          |          |
|--------------------------|----------|
| B0 Shim mode             | Standard |
| B1 Shim mode             | TrueForm |
| Adjust with body coil    | Off      |
| Confirm freq. adjustment | Off      |
| Assume Dominant Fat      | Off      |
| Assume Silicone          | Off      |
| Adjustment Tolerance     | Auto     |

**System - Adjust Volume**

|             |                    |
|-------------|--------------------|
| Position    | L0.7 P3.0 H31.9 mm |
| Orientation | Transversal        |
| Rotation    | 0.00 deg           |
| A >> P      | 256 mm             |
| R >> L      | 256 mm             |
| F >> H      | 126 mm             |
| Reset       | Off                |

**System - pTx Volumes**

|              |          |
|--------------|----------|
| B1 Shim mode | TrueForm |
| Excitation   | Standard |

**System - Tx/Rx**

|                     |                |
|---------------------|----------------|
| Frequency 1H        | 123.244475 MHz |
| Correction factor   | 1              |
| Gain                | High           |
| Img. Scale Cor.     | 2.000          |
| Reset               | Off            |
| ? Ref. amplitude 1H | 0.000 V        |

**Physio - Signal1**

|                 |         |
|-----------------|---------|
| 1st Signal/Mode | None    |
| TR              | 2800 ms |
| Concatenations  | 1       |

**Physio - PACE**

|                |     |
|----------------|-----|
| Resp. control  | Off |
| Concatenations | 1   |

**Diff - Neuro**

|                       |                        |
|-----------------------|------------------------|
| Diffusion mode        | Free                   |
| Diff. directions      | 151                    |
| Diffusion Scheme      | Monopolar              |
| Diff. weightings      | 2                      |
| b-value 1             | 0 s/mm <sup>2</sup>    |
| b-value 2             | 2000 s/mm <sup>2</sup> |
| b-value 1             | 1                      |
| b-value 2             | 1                      |
| Diff. weighted images | On                     |
| Trace weighted images | On                     |
| ADC maps              | On                     |
| FA maps               | On                     |
| Mosaic                | On                     |
| Tensor                | Off                    |

**Diff - Neuro**

|             |    |
|-------------|----|
| Noise level | 40 |
|-------------|----|

**Diff - Body**

|                       |                        |
|-----------------------|------------------------|
| Diffusion mode        | Free                   |
| Diff. directions      | 151                    |
| Diffusion Scheme      | Monopolar              |
| Diff. weightings      | 2                      |
| b-value 1             | 0 s/mm <sup>2</sup>    |
| b-value 2             | 2000 s/mm <sup>2</sup> |
| b-value 1             | 1                      |
| b-value 2             | 1                      |
| Diff. weighted images | On                     |
| Trace weighted images | On                     |
| ADC maps              | On                     |
| Exponential ADC Maps  | Off                    |
| FA maps               | On                     |
| Invert Gray Scale     | Off                    |
| Calculated Image      | Off                    |
| b-Value >=            | 0 s/mm <sup>2</sup>    |
| Noise level           | 40                     |

**Diff - Composing**

|                  |     |
|------------------|-----|
| Inline Composing | Off |
| Distortion Corr. | Off |

**Sequence - Part 1**

|                   |             |
|-------------------|-------------|
| Introduction      | On          |
| Optimization      | None        |
| Multi-slice mode  | Interleaved |
| Free echo spacing | Off         |
| Echo spacing      | 0.93 ms     |
| Bandwidth         | 1446 Hz/Px  |

**Sequence - Part 2**

|               |          |
|---------------|----------|
| EPI factor    | 128      |
| RF pulse type | Low SAR  |
| Gradient mode | Normal   |
| Excitation    | Standard |

**Sequence - pTX Pulses**

## \\Study Protocols\BRAIN\Other\TEBC\_5 year old - E161723\MTSatOn\_5y

TA: 2:05 PM: FIX Voxel size: 1.6×1.6×1.6 mmPAT: 4 Rel. SNR: 1.00 : qfl

**Properties**

|                                               |                    |
|-----------------------------------------------|--------------------|
| Prio recon                                    | Off                |
| Load images to viewer                         | On                 |
| Inline movie                                  | Off                |
| Auto store images                             | On                 |
| Load images to stamp segments                 | Off                |
| Load images to graphic segments               | Off                |
| Auto open inline display                      | Off                |
| Auto close inline display                     | Off                |
| Start measurement without further preparation | Off                |
| Wait for user to start                        | Off                |
| Start measurements                            | Single measurement |

**Routine**

|                    |                   |
|--------------------|-------------------|
| Slab group         | 1                 |
| Slabs              | 1                 |
| Dist. factor       | 20 %              |
| Position           | Isocenter         |
| Orientation        | Sagittal          |
| Phase enc. dir.    | A >> P            |
| AutoAlign          | Head > Basis      |
| Phase oversampling | 0 %               |
| Slice oversampling | 0.0 %             |
| Slices per slab    | 104               |
| FoV read           | 205 mm            |
| FoV phase          | 107.8 %           |
| Slice thickness    | 1.60 mm           |
| TR                 | 35.0 ms           |
| TE 1               | 2.29 ms           |
| TE 2               | 6.33 ms           |
| TE 3               | 10.37 ms          |
| Averages           | 1                 |
| Concatenations     | 1                 |
| Filter             | Prescan Normalize |
| Coil elements      | HEA;HEP           |

**Contrast - Common**

|                   |          |
|-------------------|----------|
| TR                | 35.0 ms  |
| TE 1              | 2.29 ms  |
| TE 2              | 6.33 ms  |
| TE 3              | 10.37 ms |
| MTC               | On       |
| Magn. preparation | None     |
| Flip angle        | 5 deg    |
| Fat suppr.        | None     |
| Water suppr.      | None     |
| SWI               | Off      |

**Contrast - Dynamic**

|                 |                  |
|-----------------|------------------|
| Averages        | 1                |
| Averaging mode  | Short term       |
| Reconstruction  | Magnitude        |
| Measurements    | 1                |
| Multiple series | Each measurement |

**Resolution - Common**

|                 |         |
|-----------------|---------|
| FoV read        | 205 mm  |
| FoV phase       | 107.8 % |
| Slice thickness | 1.60 mm |
| Base resolution | 128     |

**Resolution - Common**

|                       |       |
|-----------------------|-------|
| Phase resolution      | 100 % |
| Slice resolution      | 100 % |
| Phase partial Fourier | Off   |
| Slice partial Fourier | 7/8   |
| Interpolation         | Off   |

**Resolution - iPAT**

|                     |            |
|---------------------|------------|
| PAT mode            | GRAPPA     |
| Accel. factor PE    | 2          |
| Ref. lines PE       | 24         |
| Accel. factor 3D    | 2          |
| Ref. lines 3D       | 24         |
| Reference scan mode | Integrated |

**Resolution - Filter Image**

|                   |     |
|-------------------|-----|
| Image Filter      | Off |
| Distortion Corr.  | Off |
| Prescan Normalize | On  |
| Unfiltered images | Off |
| Normalize         | Off |
| B1 filter         | Off |

**Resolution - Filter Rawdata**

|                   |     |
|-------------------|-----|
| Raw filter        | Off |
| Elliptical filter | Off |

**Geometry - Common**

|                    |             |
|--------------------|-------------|
| Slab group         | 1           |
| Slabs              | 1           |
| Dist. factor       | 20 %        |
| Position           | Isocenter   |
| Orientation        | Sagittal    |
| Phase enc. dir.    | A >> P      |
| Slice oversampling | 0.0 %       |
| Slices per slab    | 104         |
| FoV read           | 205 mm      |
| FoV phase          | 107.8 %     |
| Slice thickness    | 1.60 mm     |
| TR                 | 35.0 ms     |
| Multi-slice mode   | Interleaved |
| Series             | Interleaved |
| Concatenations     | 1           |

**Geometry - AutoAlign**

|                     |              |
|---------------------|--------------|
| Slab group          | 1            |
| Position            | Isocenter    |
| Orientation         | Sagittal     |
| Phase enc. dir.     | A >> P       |
| AutoAlign           | Head > Basis |
| Initial Position    | Isocenter    |
| L                   | 0.0 mm       |
| P                   | 0.0 mm       |
| H                   | 0.0 mm       |
| Initial Rotation    | 0.00 deg     |
| Initial Orientation | Sagittal     |

**Geometry - Saturation**

|                 |          |
|-----------------|----------|
| Saturation mode | Standard |
| Fat suppr.      | None     |
| Water suppr.    | None     |

**Geometry - Saturation**

|              |      |
|--------------|------|
| Special sat. | None |
|--------------|------|

**Geometry - Tim Planning Suite**

|                   |      |
|-------------------|------|
| Set-n-Go Protocol | Off  |
| Table position    | H    |
| Table position    | 0 mm |
| Inline Composing  | Off  |

**System - Miscellaneous**

|                     |                      |
|---------------------|----------------------|
| Positioning mode    | FIX                  |
| Table position      | H                    |
| Table position      | 0 mm                 |
| MSMA                | S - C - T            |
| Sagittal            | R >> L               |
| Coronal             | A >> P               |
| Transversal         | F >> H               |
| Coil Combine Mode   | Sum of Squares       |
| Save uncombined     | Off                  |
| Matrix Optimization | Off                  |
| AutoAlign           | Head > Basis         |
| Coil Select Mode    | Off - AutoCoilSelect |

**System - Adjustments**

|                          |          |
|--------------------------|----------|
| B0 Shim mode             | Tune up  |
| B1 Shim mode             | TrueForm |
| Adjust with body coil    | Off      |
| Confirm freq. adjustment | Off      |
| Assume Dominant Fat      | Off      |
| Assume Silicone          | Off      |
| Adjustment Tolerance     | Auto     |

**System - Adjust Volume**

|             |             |
|-------------|-------------|
| Position    | Isocenter   |
| Orientation | Transversal |
| Rotation    | 0.00 deg    |
| A >> P      | 263 mm      |
| R >> L      | 350 mm      |
| F >> H      | 350 mm      |
| Reset       | Off         |

**System - pTx Volumes**

|              |          |
|--------------|----------|
| B1 Shim mode | TrueForm |
| Excitation   | Non-sel. |

**System - Tx/Rx**

|                     |                |
|---------------------|----------------|
| Frequency 1H        | 123.244475 MHz |
| Correction factor   | 1              |
| Gain                | Low            |
| Img. Scale Cor.     | 3.000          |
| Reset               | Off            |
| ? Ref. amplitude 1H | 0.000 V        |

**Physio - Signal1**

|                 |         |
|-----------------|---------|
| 1st Signal/Mode | None    |
| TR              | 35.0 ms |
| Concatenations  | 1       |
| Segments        | 1       |

**Physio - Cardiac**

|                   |      |
|-------------------|------|
| Tagging           | None |
| Magn. preparation | None |
| Fat suppr.        | None |
| Dark blood        | Off  |

**Physio - Cardiac**

|                  |         |
|------------------|---------|
| FoV read         | 205 mm  |
| FoV phase        | 107.8 % |
| Phase resolution | 100 %   |

**Physio - PACE**

|                |     |
|----------------|-----|
| Resp. control  | Off |
| Concatenations | 1   |

**Inline - Common**

|                      |     |
|----------------------|-----|
| Subtract             | Off |
| Measurements         | 1   |
| StdDev               | Off |
| Liver registration   | Off |
| Save original images | On  |

**Inline - MIP**

|                      |     |
|----------------------|-----|
| MIP-Sag              | Off |
| MIP-Cor              | Off |
| MIP-Tra              | Off |
| MIP-Time             | Off |
| Save original images | On  |

**Inline - Soft Tissue**

|              |     |
|--------------|-----|
| Wash - In    | Off |
| Wash - Out   | Off |
| TTP          | Off |
| PEI          | Off |
| MIP - time   | Off |
| Measurements | 1   |

**Inline - Composing**

|                  |     |
|------------------|-----|
| Inline Composing | Off |
| Distortion Corr. | Off |

**Inline - MapIt**

|                      |          |
|----------------------|----------|
| Save original images | On       |
| MapIt                | None     |
| Flip angle           | 5 deg    |
| Measurements         | 1        |
| Contrasts            | 3        |
| TR                   | 35.0 ms  |
| TE 1                 | 2.29 ms  |
| TE 2                 | 6.33 ms  |
| TE 3                 | 10.37 ms |

**Sequence - Part 1**

|                     |             |
|---------------------|-------------|
| Introduction        | On          |
| Dimension           | 3D          |
| Elliptical scanning | Off         |
| Phase stabilisation | Off         |
| Asymmetric echo     | Off         |
| Contrasts           | 3           |
| Flow comp. 1        | No          |
| Readout mode        | Monopolar   |
| Multi-slice mode    | Interleaved |
| Bandwidth 1         | 400 Hz/Px   |
| Bandwidth 2         | 400 Hz/Px   |
| Bandwidth 3         | 400 Hz/Px   |

**Sequence - Part 2**

|                          |         |
|--------------------------|---------|
| Segments                 | 1       |
| Acoustic noise reduction | Active  |
| RF pulse type            | Low SAR |

**Sequence - Part 2**

|               |          |
|---------------|----------|
| Gradient mode | Whisper  |
| Excitation    | Non-sel. |
| RF spoiling   | On       |

**Sequence - Assistant**

|               |      |
|---------------|------|
| Mode          | Off  |
| Allowed delay | 30 s |



\\Study Protocols\BRAIN\Other\TEBC\_5 year old - E161723\MTSatOff\_5y

TA: 2:05 PM: FIX Voxel size: 1.6×1.6×1.6 mmPAT: 4 Rel. SNR: 1.00 : qfl

**Properties**

|                                               |                    |
|-----------------------------------------------|--------------------|
| Prio recon                                    | Off                |
| Load images to viewer                         | On                 |
| Inline movie                                  | Off                |
| Auto store images                             | On                 |
| Load images to stamp segments                 | Off                |
| Load images to graphic segments               | Off                |
| Auto open inline display                      | Off                |
| Auto close inline display                     | Off                |
| Start measurement without further preparation | Off                |
| Wait for user to start                        | Off                |
| Start measurements                            | Single measurement |

**Routine**

|                    |                   |
|--------------------|-------------------|
| Slab group         | 1                 |
| Slabs              | 1                 |
| Dist. factor       | 20 %              |
| Position           | Isocenter         |
| Orientation        | Sagittal          |
| Phase enc. dir.    | A >> P            |
| AutoAlign          | Head > Basis      |
| Phase oversampling | 0 %               |
| Slice oversampling | 0.0 %             |
| Slices per slab    | 104               |
| FoV read           | 205 mm            |
| FoV phase          | 107.8 %           |
| Slice thickness    | 1.60 mm           |
| TR                 | 35.0 ms           |
| TE 1               | 2.29 ms           |
| TE 2               | 6.33 ms           |
| TE 3               | 10.37 ms          |
| Averages           | 1                 |
| Concatenations     | 1                 |
| Filter             | Prescan Normalize |
| Coil elements      | HEA;HEP           |

**Contrast - Common**

|                   |          |
|-------------------|----------|
| TR                | 35.0 ms  |
| TE 1              | 2.29 ms  |
| TE 2              | 6.33 ms  |
| TE 3              | 10.37 ms |
| MTC               | Off      |
| Magn. preparation | None     |
| Flip angle        | 5 deg    |
| Fat suppr.        | None     |
| Water suppr.      | None     |
| SWI               | Off      |

**Contrast - Dynamic**

|                 |                  |
|-----------------|------------------|
| Averages        | 1                |
| Averaging mode  | Short term       |
| Reconstruction  | Magnitude        |
| Measurements    | 1                |
| Multiple series | Each measurement |

**Resolution - Common**

|                 |         |
|-----------------|---------|
| FoV read        | 205 mm  |
| FoV phase       | 107.8 % |
| Slice thickness | 1.60 mm |
| Base resolution | 128     |

**Resolution - Common**

|                       |       |
|-----------------------|-------|
| Phase resolution      | 100 % |
| Slice resolution      | 100 % |
| Phase partial Fourier | Off   |
| Slice partial Fourier | 7/8   |
| Interpolation         | Off   |

**Resolution - iPAT**

|                     |            |
|---------------------|------------|
| PAT mode            | GRAPPA     |
| Accel. factor PE    | 2          |
| Ref. lines PE       | 24         |
| Accel. factor 3D    | 2          |
| Ref. lines 3D       | 24         |
| Reference scan mode | Integrated |

**Resolution - Filter Image**

|                   |     |
|-------------------|-----|
| Image Filter      | Off |
| Distortion Corr.  | Off |
| Prescan Normalize | On  |
| Unfiltered images | Off |
| Normalize         | Off |
| B1 filter         | Off |

**Resolution - Filter Rawdata**

|                   |     |
|-------------------|-----|
| Raw filter        | Off |
| Elliptical filter | Off |

**Geometry - Common**

|                    |             |
|--------------------|-------------|
| Slab group         | 1           |
| Slabs              | 1           |
| Dist. factor       | 20 %        |
| Position           | Isocenter   |
| Orientation        | Sagittal    |
| Phase enc. dir.    | A >> P      |
| Slice oversampling | 0.0 %       |
| Slices per slab    | 104         |
| FoV read           | 205 mm      |
| FoV phase          | 107.8 %     |
| Slice thickness    | 1.60 mm     |
| TR                 | 35.0 ms     |
| Multi-slice mode   | Interleaved |
| Series             | Interleaved |
| Concatenations     | 1           |

**Geometry - AutoAlign**

|                     |              |
|---------------------|--------------|
| Slab group          | 1            |
| Position            | Isocenter    |
| Orientation         | Sagittal     |
| Phase enc. dir.     | A >> P       |
| AutoAlign           | Head > Basis |
| Initial Position    | Isocenter    |
| L                   | 0.0 mm       |
| P                   | 0.0 mm       |
| H                   | 0.0 mm       |
| Initial Rotation    | 0.00 deg     |
| Initial Orientation | Sagittal     |

**Geometry - Saturation**

|                 |          |
|-----------------|----------|
| Saturation mode | Standard |
| Fat suppr.      | None     |
| Water suppr.    | None     |

**Geometry - Saturation**

|              |      |
|--------------|------|
| Special sat. | None |
|--------------|------|

**Geometry - Tim Planning Suite**

|                   |      |
|-------------------|------|
| Set-n-Go Protocol | Off  |
| Table position    | H    |
| Table position    | 0 mm |
| Inline Composing  | Off  |

**System - Miscellaneous**

|                     |                      |
|---------------------|----------------------|
| Positioning mode    | FIX                  |
| Table position      | H                    |
| Table position      | 0 mm                 |
| MSMA                | S - C - T            |
| Sagittal            | R >> L               |
| Coronal             | A >> P               |
| Transversal         | F >> H               |
| Coil Combine Mode   | Sum of Squares       |
| Save uncombined     | Off                  |
| Matrix Optimization | Off                  |
| AutoAlign           | Head > Basis         |
| Coil Select Mode    | Off - AutoCoilSelect |

**System - Adjustments**

|                          |          |
|--------------------------|----------|
| B0 Shim mode             | Tune up  |
| B1 Shim mode             | TrueForm |
| Adjust with body coil    | Off      |
| Confirm freq. adjustment | Off      |
| Assume Dominant Fat      | Off      |
| Assume Silicone          | Off      |
| Adjustment Tolerance     | Auto     |

**System - Adjust Volume**

|             |             |
|-------------|-------------|
| Position    | Isocenter   |
| Orientation | Transversal |
| Rotation    | 0.00 deg    |
| A >> P      | 263 mm      |
| R >> L      | 350 mm      |
| F >> H      | 350 mm      |
| Reset       | Off         |

**System - pTx Volumes**

|              |          |
|--------------|----------|
| B1 Shim mode | TrueForm |
| Excitation   | Non-sel. |

**System - Tx/Rx**

|                     |                |
|---------------------|----------------|
| Frequency 1H        | 123.244475 MHz |
| Correction factor   | 1              |
| Gain                | Low            |
| Img. Scale Cor.     | 3.000          |
| Reset               | Off            |
| ? Ref. amplitude 1H | 0.000 V        |

**Physio - Signal1**

|                 |         |
|-----------------|---------|
| 1st Signal/Mode | None    |
| TR              | 35.0 ms |
| Concatenations  | 1       |
| Segments        | 1       |

**Physio - Cardiac**

|                   |      |
|-------------------|------|
| Tagging           | None |
| Magn. preparation | None |
| Fat suppr.        | None |
| Dark blood        | Off  |

**Physio - Cardiac**

|                  |         |
|------------------|---------|
| FoV read         | 205 mm  |
| FoV phase        | 107.8 % |
| Phase resolution | 100 %   |

**Physio - PACE**

|                |     |
|----------------|-----|
| Resp. control  | Off |
| Concatenations | 1   |

**Inline - Common**

|                      |     |
|----------------------|-----|
| Subtract             | Off |
| Measurements         | 1   |
| StdDev               | Off |
| Liver registration   | Off |
| Save original images | On  |

**Inline - MIP**

|                      |     |
|----------------------|-----|
| MIP-Sag              | Off |
| MIP-Cor              | Off |
| MIP-Tra              | Off |
| MIP-Time             | Off |
| Save original images | On  |

**Inline - Soft Tissue**

|              |     |
|--------------|-----|
| Wash - In    | Off |
| Wash - Out   | Off |
| TTP          | Off |
| PEI          | Off |
| MIP - time   | Off |
| Measurements | 1   |

**Inline - Composing**

|                  |     |
|------------------|-----|
| Inline Composing | Off |
| Distortion Corr. | Off |

**Inline - MapIt**

|                      |          |
|----------------------|----------|
| Save original images | On       |
| MapIt                | None     |
| Flip angle           | 5 deg    |
| Measurements         | 1        |
| Contrasts            | 3        |
| TR                   | 35.0 ms  |
| TE 1                 | 2.29 ms  |
| TE 2                 | 6.33 ms  |
| TE 3                 | 10.37 ms |

**Sequence - Part 1**

|                     |             |
|---------------------|-------------|
| Introduction        | On          |
| Dimension           | 3D          |
| Elliptical scanning | Off         |
| Phase stabilisation | Off         |
| Asymmetric echo     | Off         |
| Contrasts           | 3           |
| Flow comp. 1        | No          |
| Readout mode        | Monopolar   |
| Multi-slice mode    | Interleaved |
| Bandwidth 1         | 400 Hz/Px   |
| Bandwidth 2         | 400 Hz/Px   |
| Bandwidth 3         | 400 Hz/Px   |

**Sequence - Part 2**

|                          |         |
|--------------------------|---------|
| Segments                 | 1       |
| Acoustic noise reduction | Active  |
| RF pulse type            | Low SAR |

**Sequence - Part 2**

|               |          |
|---------------|----------|
| Gradient mode | Whisper  |
| Excitation    | Non-sel. |
| RF spoiling   | On       |

**Sequence - Assistant**

|               |      |
|---------------|------|
| Mode          | Off  |
| Allowed delay | 30 s |

\\Study Protocols\BRAIN\Other\TEBC\_5 year old - E161723\MTSatT1w\_5y

TA: 0:55 PM: FIX Voxel size: 1.6×1.6×1.6 mmPAT: 4 Rel. SNR: 1.00 : qfl

**Properties**

|                                               |                    |
|-----------------------------------------------|--------------------|
| Prio recon                                    | Off                |
| Load images to viewer                         | On                 |
| Inline movie                                  | Off                |
| Auto store images                             | On                 |
| Load images to stamp segments                 | Off                |
| Load images to graphic segments               | Off                |
| Auto open inline display                      | Off                |
| Auto close inline display                     | Off                |
| Start measurement without further preparation | Off                |
| Wait for user to start                        | Off                |
| Start measurements                            | Single measurement |

**Routine**

|                    |                   |
|--------------------|-------------------|
| Slab group         | 1                 |
| Slabs              | 1                 |
| Dist. factor       | 20 %              |
| Position           | Isocenter         |
| Orientation        | Sagittal          |
| Phase enc. dir.    | A >> P            |
| AutoAlign          | Head > Basis      |
| Phase oversampling | 0 %               |
| Slice oversampling | 0.0 %             |
| Slices per slab    | 104               |
| FoV read           | 205 mm            |
| FoV phase          | 107.8 %           |
| Slice thickness    | 1.60 mm           |
| TR                 | 15.0 ms           |
| TE 1               | 2.29 ms           |
| TE 2               | 6.33 ms           |
| TE 3               | 10.37 ms          |
| Averages           | 1                 |
| Concatenations     | 1                 |
| Filter             | Prescan Normalize |
| Coil elements      | HEA;HEP           |

**Contrast - Common**

|                   |          |
|-------------------|----------|
| TR                | 15.0 ms  |
| TE 1              | 2.29 ms  |
| TE 2              | 6.33 ms  |
| TE 3              | 10.37 ms |
| MTC               | Off      |
| Magn. preparation | None     |
| Flip angle        | 18 deg   |
| Fat suppr.        | None     |
| Water suppr.      | None     |
| SWI               | Off      |

**Contrast - Dynamic**

|                 |                  |
|-----------------|------------------|
| Averages        | 1                |
| Averaging mode  | Short term       |
| Reconstruction  | Magnitude        |
| Measurements    | 1                |
| Multiple series | Each measurement |

**Resolution - Common**

|                 |         |
|-----------------|---------|
| FoV read        | 205 mm  |
| FoV phase       | 107.8 % |
| Slice thickness | 1.60 mm |
| Base resolution | 128     |

**Resolution - Common**

|                       |       |
|-----------------------|-------|
| Phase resolution      | 100 % |
| Slice resolution      | 100 % |
| Phase partial Fourier | Off   |
| Slice partial Fourier | 7/8   |
| Interpolation         | Off   |

**Resolution - iPAT**

|                     |            |
|---------------------|------------|
| PAT mode            | GRAPPA     |
| Accel. factor PE    | 2          |
| Ref. lines PE       | 24         |
| Accel. factor 3D    | 2          |
| Ref. lines 3D       | 24         |
| Reference scan mode | Integrated |

**Resolution - Filter Image**

|                   |     |
|-------------------|-----|
| Image Filter      | Off |
| Distortion Corr.  | Off |
| Prescan Normalize | On  |
| Unfiltered images | Off |
| Normalize         | Off |
| B1 filter         | Off |

**Resolution - Filter Rawdata**

|                   |     |
|-------------------|-----|
| Raw filter        | Off |
| Elliptical filter | Off |

**Geometry - Common**

|                    |             |
|--------------------|-------------|
| Slab group         | 1           |
| Slabs              | 1           |
| Dist. factor       | 20 %        |
| Position           | Isocenter   |
| Orientation        | Sagittal    |
| Phase enc. dir.    | A >> P      |
| Slice oversampling | 0.0 %       |
| Slices per slab    | 104         |
| FoV read           | 205 mm      |
| FoV phase          | 107.8 %     |
| Slice thickness    | 1.60 mm     |
| TR                 | 15.0 ms     |
| Multi-slice mode   | Interleaved |
| Series             | Interleaved |
| Concatenations     | 1           |

**Geometry - AutoAlign**

|                     |              |
|---------------------|--------------|
| Slab group          | 1            |
| Position            | Isocenter    |
| Orientation         | Sagittal     |
| Phase enc. dir.     | A >> P       |
| AutoAlign           | Head > Basis |
| Initial Position    | Isocenter    |
| L                   | 0.0 mm       |
| P                   | 0.0 mm       |
| H                   | 0.0 mm       |
| Initial Rotation    | 0.00 deg     |
| Initial Orientation | Sagittal     |

**Geometry - Saturation**

|                 |          |
|-----------------|----------|
| Saturation mode | Standard |
| Fat suppr.      | None     |
| Water suppr.    | None     |

**Geometry - Saturation**

|              |      |
|--------------|------|
| Special sat. | None |
|--------------|------|

**Geometry - Tim Planning Suite**

|                   |      |
|-------------------|------|
| Set-n-Go Protocol | Off  |
| Table position    | H    |
| Table position    | 0 mm |
| Inline Composing  | Off  |

**System - Miscellaneous**

|                     |                      |
|---------------------|----------------------|
| Positioning mode    | FIX                  |
| Table position      | H                    |
| Table position      | 0 mm                 |
| MSMA                | S - C - T            |
| Sagittal            | R >> L               |
| Coronal             | A >> P               |
| Transversal         | F >> H               |
| Coil Combine Mode   | Sum of Squares       |
| Save uncombined     | Off                  |
| Matrix Optimization | Off                  |
| AutoAlign           | Head > Basis         |
| Coil Select Mode    | Off - AutoCoilSelect |

**System - Adjustments**

|                          |          |
|--------------------------|----------|
| B0 Shim mode             | Tune up  |
| B1 Shim mode             | TrueForm |
| Adjust with body coil    | Off      |
| Confirm freq. adjustment | Off      |
| Assume Dominant Fat      | Off      |
| Assume Silicone          | Off      |
| Adjustment Tolerance     | Auto     |

**System - Adjust Volume**

|             |             |
|-------------|-------------|
| Position    | Isocenter   |
| Orientation | Transversal |
| Rotation    | 0.00 deg    |
| A >> P      | 263 mm      |
| R >> L      | 350 mm      |
| F >> H      | 350 mm      |
| Reset       | Off         |

**System - pTx Volumes**

|              |          |
|--------------|----------|
| B1 Shim mode | TrueForm |
| Excitation   | Non-sel. |

**System - Tx/Rx**

|                     |                |
|---------------------|----------------|
| Frequency 1H        | 123.244475 MHz |
| Correction factor   | 1              |
| Gain                | Low            |
| Img. Scale Cor.     | 3.000          |
| Reset               | Off            |
| ? Ref. amplitude 1H | 0.000 V        |

**Physio - Signal1**

|                 |         |
|-----------------|---------|
| 1st Signal/Mode | None    |
| TR              | 15.0 ms |
| Concatenations  | 1       |
| Segments        | 1       |

**Physio - Cardiac**

|                   |      |
|-------------------|------|
| Tagging           | None |
| Magn. preparation | None |
| Fat suppr.        | None |
| Dark blood        | Off  |

**Physio - Cardiac**

|                  |         |
|------------------|---------|
| FoV read         | 205 mm  |
| FoV phase        | 107.8 % |
| Phase resolution | 100 %   |

**Physio - PACE**

|                |     |
|----------------|-----|
| Resp. control  | Off |
| Concatenations | 1   |

**Inline - Common**

|                      |     |
|----------------------|-----|
| Subtract             | Off |
| Measurements         | 1   |
| StdDev               | Off |
| Liver registration   | Off |
| Save original images | On  |

**Inline - MIP**

|                      |     |
|----------------------|-----|
| MIP-Sag              | Off |
| MIP-Cor              | Off |
| MIP-Tra              | Off |
| MIP-Time             | Off |
| Save original images | On  |

**Inline - Soft Tissue**

|              |     |
|--------------|-----|
| Wash - In    | Off |
| Wash - Out   | Off |
| TTP          | Off |
| PEI          | Off |
| MIP - time   | Off |
| Measurements | 1   |

**Inline - Composing**

|                  |     |
|------------------|-----|
| Inline Composing | Off |
| Distortion Corr. | Off |

**Inline - MapIt**

|                      |          |
|----------------------|----------|
| Save original images | On       |
| MapIt                | None     |
| Flip angle           | 18 deg   |
| Measurements         | 1        |
| Contrasts            | 3        |
| TR                   | 15.0 ms  |
| TE 1                 | 2.29 ms  |
| TE 2                 | 6.33 ms  |
| TE 3                 | 10.37 ms |

**Sequence - Part 1**

|                     |             |
|---------------------|-------------|
| Introduction        | On          |
| Dimension           | 3D          |
| Elliptical scanning | Off         |
| Phase stabilisation | Off         |
| Asymmetric echo     | Off         |
| Contrasts           | 3           |
| Flow comp. 1        | No          |
| Readout mode        | Monopolar   |
| Multi-slice mode    | Interleaved |
| Bandwidth 1         | 400 Hz/Px   |
| Bandwidth 2         | 400 Hz/Px   |
| Bandwidth 3         | 400 Hz/Px   |

**Sequence - Part 2**

|                          |         |
|--------------------------|---------|
| Segments                 | 1       |
| Acoustic noise reduction | Active  |
| RF pulse type            | Low SAR |

**Sequence - Part 2**

|               |          |
|---------------|----------|
| Gradient mode | Whisper  |
| Excitation    | Non-sel. |
| RF spoiling   | On       |

**Sequence - Assistant**

|               |      |
|---------------|------|
| Mode          | Off  |
| Allowed delay | 30 s |

\\Study Protocols\BRAIN\Other\TEBC\_5 year old - E161723\gre\_field\_mapping\_3mm

TA: 1:18 PM: FIX Voxel size: 2.3x2.3x2.3 mmRel. SNR: 1.00 : fm\_r

**Properties**

|                                               |                    |
|-----------------------------------------------|--------------------|
| Prio recon                                    | Off                |
| Load images to viewer                         | On                 |
| Inline movie                                  | Off                |
| Auto store images                             | On                 |
| Load images to stamp segments                 | Off                |
| Load images to graphic segments               | Off                |
| Auto open inline display                      | Off                |
| Auto close inline display                     | Off                |
| Start measurement without further preparation | Off                |
| Wait for user to start                        | Off                |
| Start measurements                            | Single measurement |

**Routine**

|                    |              |
|--------------------|--------------|
| Slice group        | 1            |
| Slices             | 45           |
| Dist. factor       | 20 %         |
| Position           | Isocenter    |
| Orientation        | Transversal  |
| Phase enc. dir.    | R >> L       |
| AutoAlign          | Head > Brain |
| Phase oversampling | 0 %          |
| FoV read           | 193 mm       |
| FoV phase          | 100.0 %      |
| Slice thickness    | 2.3 mm       |
| TR                 | 450.0 ms     |
| TE 1               | 4.92 ms      |
| TE 2               | 7.38 ms      |
| Averages           | 1            |
| Concatenations     | 1            |
| Filter             | None         |
| Coil elements      | HEA;HEP      |

**Contrast - Common**

|            |          |
|------------|----------|
| TR         | 450.0 ms |
| TE 1       | 4.92 ms  |
| TE 2       | 7.38 ms  |
| MTC        | Off      |
| Flip angle | 60 deg   |
| Fat suppr. | None     |

**Contrast - Dynamic**

|                 |             |
|-----------------|-------------|
| Averages        | 1           |
| Averaging mode  | Long term   |
| Reconstruction  | Magn./Phase |
| Measurements    | 1           |
| Multiple series | Off         |

**Resolution - Common**

|                       |         |
|-----------------------|---------|
| FoV read              | 193 mm  |
| FoV phase             | 100.0 % |
| Slice thickness       | 2.3 mm  |
| Base resolution       | 84      |
| Phase resolution      | 100 %   |
| Phase partial Fourier | Off     |
| Interpolation         | Off     |

**Resolution - Filter Image**

|                  |     |
|------------------|-----|
| Image Filter     | Off |
| Distortion Corr. | Off |

**Resolution - Filter Image**

|                   |     |
|-------------------|-----|
| Prescan Normalize | Off |
| Normalize         | Off |
| B1 filter         | Off |

**Resolution - Filter Rawdata**

|                   |     |
|-------------------|-----|
| Raw filter        | Off |
| Elliptical filter | Off |

**Geometry - Common**

|                  |             |
|------------------|-------------|
| Slice group      | 1           |
| Slices           | 45          |
| Dist. factor     | 20 %        |
| Position         | Isocenter   |
| Orientation      | Transversal |
| Phase enc. dir.  | R >> L      |
| FoV read         | 193 mm      |
| FoV phase        | 100.0 %     |
| Slice thickness  | 2.3 mm      |
| TR               | 450.0 ms    |
| Multi-slice mode | Interleaved |
| Series           | Interleaved |
| Concatenations   | 1           |

**Geometry - AutoAlign**

|                     |              |
|---------------------|--------------|
| Slice group         | 1            |
| Position            | Isocenter    |
| Orientation         | Transversal  |
| Phase enc. dir.     | R >> L       |
| AutoAlign           | Head > Brain |
| Initial Position    | Isocenter    |
| L                   | 0.0 mm       |
| P                   | 0.0 mm       |
| H                   | 0.0 mm       |
| Initial Rotation    | 90.00 deg    |
| Initial Orientation | Transversal  |

**Geometry - Saturation**

|              |      |
|--------------|------|
| Fat suppr.   | None |
| Special sat. | None |

**Geometry - Tim Planning Suite**

|                   |      |
|-------------------|------|
| Set-n-Go Protocol | Off  |
| Table position    | H    |
| Table position    | 0 mm |
| Inline Composing  | Off  |

**System - Miscellaneous**

|                     |                      |
|---------------------|----------------------|
| Positioning mode    | FIX                  |
| Table position      | H                    |
| Table position      | 0 mm                 |
| MSMA                | S - C - T            |
| Sagittal            | R >> L               |
| Coronal             | A >> P               |
| Transversal         | F >> H               |
| Coil Combine Mode   | Sum of Squares       |
| Save uncombined     | Off                  |
| Matrix Optimization | Off                  |
| AutoAlign           | Head > Brain         |
| Coil Select Mode    | Off - AutoCoilSelect |

**System - Adjustments**

|                          |          |
|--------------------------|----------|
| B0 Shim mode             | Standard |
| B1 Shim mode             | TrueForm |
| Adjust with body coil    | Off      |
| Confirm freq. adjustment | Off      |
| Assume Dominant Fat      | Off      |
| Assume Silicone          | Off      |
| Adjustment Tolerance     | Auto     |

**System - Adjust Volume**

|             |             |
|-------------|-------------|
| Position    | Isocenter   |
| Orientation | Transversal |
| Rotation    | 90.00 deg   |
| R >> L      | 193 mm      |
| A >> P      | 193 mm      |
| F >> H      | 124 mm      |
| Reset       | Off         |

**System - pTx Volumes**

|              |          |
|--------------|----------|
| B1 Shim mode | TrueForm |
|--------------|----------|

**System - Tx/Rx**

|                     |                |
|---------------------|----------------|
| Frequency 1H        | 123.244475 MHz |
| Correction factor   | 1              |
| Gain                | High           |
| Img. Scale Cor.     | 1.000          |
| Reset               | Off            |
| ? Ref. amplitude 1H | 0.000 V        |

**Sequence - Part 1**

|                  |             |
|------------------|-------------|
| Introduction     | On          |
| Dimension        | 2D          |
| Asymmetric echo  | Off         |
| Contrasts        | 2           |
| Flow comp.       | Yes         |
| Multi-slice mode | Interleaved |
| Bandwidth        | 595 Hz/Px   |

**Sequence - Part 2**

|               |        |
|---------------|--------|
| RF pulse type | Normal |
| Gradient mode | Fast   |
| RF spoiling   | On     |

**Sequence - Assistant**

|      |     |
|------|-----|
| Mode | Off |
|------|-----|



\\Study Protocols\BRAIN\Other\TEBC\_5 year old - E161723\lep2d\_p2\_s3\_AP\_pixar-1

TA: 5:34 PM: FIX Voxel size: 2.3x2.3x2.3 mmPAT: 6 Rel. SNR: 1.00 : epfid

**Properties**

|                                               |                    |
|-----------------------------------------------|--------------------|
| Prio recon                                    | Off                |
| Load images to viewer                         | On                 |
| Inline movie                                  | Off                |
| Auto store images                             | On                 |
| Load images to stamp segments                 | Off                |
| Load images to graphic segments               | Off                |
| Auto open inline display                      | Off                |
| Auto close inline display                     | Off                |
| Start measurement without further preparation | Off                |
| Wait for user to start                        | On                 |
| Start measurements                            | Single measurement |

**Routine**

|                    |              |
|--------------------|--------------|
| Slice group        | 1            |
| Slices             | 45           |
| Dist. factor       | 20 %         |
| Position           | Isocenter    |
| Orientation        | Transversal  |
| Phase enc. dir.    | A >> P       |
| AutoAlign          | Head > Brain |
| Phase oversampling | 0 %          |
| FoV read           | 193 mm       |
| FoV phase          | 100.0 %      |
| Slice thickness    | 2.3 mm       |
| TR                 | 1000 ms      |
| TE                 | 30.0 ms      |
| Averages           | 1            |
| Concatenations     | 1            |
| Filter             | None         |
| Coil elements      | HEA;HEP      |

**Contrast - Common**

|            |          |
|------------|----------|
| TR         | 1000 ms  |
| TE         | 30.0 ms  |
| MTC        | Off      |
| Flip angle | 60 deg   |
| Fat suppr. | Fat sat. |

**Contrast - Dynamic**

|                 |           |
|-----------------|-----------|
| Averages        | 1         |
| Averaging mode  | Long term |
| Reconstruction  | Magnitude |
| Measurements    | 324       |
| Delay in TR     | 0 ms      |
| Multiple series | Off       |

**Resolution - Common**

|                       |         |
|-----------------------|---------|
| FoV read              | 193 mm  |
| FoV phase             | 100.0 % |
| Slice thickness       | 2.3 mm  |
| Base resolution       | 84      |
| Phase resolution      | 100 %   |
| Phase partial Fourier | Off     |
| Interpolation         | Off     |

**Resolution - iPAT**

|                  |              |
|------------------|--------------|
| Accel. mode      | Slice accel. |
| Accel. factor PE | 2            |
| Ref. lines PE    | 24           |

**Resolution - iPAT**

|                     |              |
|---------------------|--------------|
| Accel. factor slice | 3            |
| Reference scan mode | EPI/separate |

**Resolution - Filter Image**

|                   |     |
|-------------------|-----|
| Distortion Corr.  | Off |
| Prescan Normalize | Off |

**Resolution - Filter Rawdata**

|                   |     |
|-------------------|-----|
| Raw filter        | Off |
| Elliptical filter | Off |
| Hamming           | Off |

**Geometry - Common**

|                  |             |
|------------------|-------------|
| Slice group      | 1           |
| Slices           | 45          |
| Dist. factor     | 20 %        |
| Position         | Isocenter   |
| Orientation      | Transversal |
| Phase enc. dir.  | A >> P      |
| FoV read         | 193 mm      |
| FoV phase        | 100.0 %     |
| Slice thickness  | 2.3 mm      |
| TR               | 1000 ms     |
| Multi-slice mode | Interleaved |
| Series           | Interleaved |
| Concatenations   | 1           |

**Geometry - AutoAlign**

|                     |              |
|---------------------|--------------|
| Slice group         | 1            |
| Position            | Isocenter    |
| Orientation         | Transversal  |
| Phase enc. dir.     | A >> P       |
| AutoAlign           | Head > Brain |
| Initial Position    | Isocenter    |
| L                   | 0.0 mm       |
| P                   | 0.0 mm       |
| H                   | 0.0 mm       |
| Initial Rotation    | 0.00 deg     |
| Initial Orientation | Transversal  |

**Geometry - Saturation**

|              |          |
|--------------|----------|
| Fat suppr.   | Fat sat. |
| Special sat. | None     |

**Geometry - Tim Planning Suite**

|                   |      |
|-------------------|------|
| Set-n-Go Protocol | Off  |
| Table position    | H    |
| Table position    | 0 mm |
| Inline Composing  | Off  |

**System - Miscellaneous**

|                     |                |
|---------------------|----------------|
| Positioning mode    | FIX            |
| Table position      | H              |
| Table position      | 0 mm           |
| MSMA                | S - C - T      |
| Sagittal            | R >> L         |
| Coronal             | A >> P         |
| Transversal         | F >> H         |
| Coil Combine Mode   | Sum of Squares |
| Matrix Optimization | Off            |

**System - Miscellaneous**

|                  |                      |
|------------------|----------------------|
| AutoAlign        | Head > Brain         |
| Coil Select Mode | Off - AutoCoilSelect |

**System - Adjustments**

|                          |          |
|--------------------------|----------|
| B0 Shim mode             | Standard |
| B1 Shim mode             | TrueForm |
| Adjust with body coil    | Off      |
| Confirm freq. adjustment | Off      |
| Assume Dominant Fat      | Off      |
| Assume Silicone          | Off      |
| Adjustment Tolerance     | Auto     |

**System - Adjust Volume**

|             |             |
|-------------|-------------|
| Position    | Isocenter   |
| Orientation | Transversal |
| Rotation    | 0.00 deg    |
| A >> P      | 193 mm      |
| R >> L      | 193 mm      |
| F >> H      | 124 mm      |
| Reset       | Off         |

**System - pTx Volumes**

|              |          |
|--------------|----------|
| B1 Shim mode | TrueForm |
| Excitation   | Standard |

**System - Tx/Rx**

|                     |                |
|---------------------|----------------|
| Frequency 1H        | 123.244475 MHz |
| Correction factor   | 1              |
| Gain                | High           |
| Img. Scale Cor.     | 1.500          |
| Reset               | Off            |
| ? Ref. amplitude 1H | 0.000 V        |

**Physio - Signal1**

|                 |         |
|-----------------|---------|
| 1st Signal/Mode | None    |
| TR              | 1000 ms |
| Concatenations  | 1       |

**BOLD**

|                         |          |
|-------------------------|----------|
| GLM Statistics          | Off      |
| Dynamic t-maps          | Off      |
| Ignore meas. at start   | 0        |
| Ignore after transition | 0        |
| Model transition states | On       |
| Temp. highpass filter   | On       |
| Threshold               | 4.00     |
| Paradigm size           | 40       |
| Meas[1]                 | Baseline |
| Meas[2]                 | Baseline |
| Meas[3]                 | Baseline |
| Meas[4]                 | Baseline |
| Meas[5]                 | Baseline |
| Meas[6]                 | Baseline |
| Meas[7]                 | Baseline |
| Meas[8]                 | Baseline |
| Meas[9]                 | Baseline |
| Meas[10]                | Baseline |
| Meas[11]                | Baseline |
| Meas[12]                | Baseline |
| Meas[13]                | Baseline |
| Meas[14]                | Baseline |
| Meas[15]                | Baseline |
| Meas[16]                | Baseline |
| Meas[17]                | Baseline |

**BOLD**

|                   |          |
|-------------------|----------|
| Meas[18]          | Baseline |
| Meas[19]          | Baseline |
| Meas[20]          | Baseline |
| Meas[21]          | Active   |
| Meas[22]          | Active   |
| Meas[23]          | Active   |
| Meas[24]          | Active   |
| Meas[25]          | Active   |
| Meas[26]          | Active   |
| Meas[27]          | Active   |
| Meas[28]          | Active   |
| Meas[29]          | Active   |
| Meas[30]          | Active   |
| Meas[31]          | Active   |
| Meas[32]          | Active   |
| Meas[33]          | Active   |
| Meas[34]          | Active   |
| Meas[35]          | Active   |
| Meas[36]          | Active   |
| Meas[37]          | Active   |
| Meas[38]          | Active   |
| Meas[39]          | Active   |
| Meas[40]          | Active   |
| Motion correction | Off      |
| Spatial filter    | Off      |
| Measurements      | 324      |
| Delay in TR       | 0 ms     |
| Multiple series   | Off      |

**Sequence - Part 1**

|                   |             |
|-------------------|-------------|
| Introduction      | Off         |
| Multi-slice mode  | Interleaved |
| Free echo spacing | Off         |
| Echo spacing      | 0.7 ms      |
| Bandwidth         | 2290 Hz/Px  |

**Sequence - Part 2**

|               |          |
|---------------|----------|
| EPI factor    | 84       |
| RF pulse type | Normal   |
| Gradient mode | Normal   |
| Excitation    | Standard |

**Sequence - pTX Pulses**

\\Study Protocols\BRAIN\Other\TEBC\_5 year old - E161723\lep2d\_p2\_s3\_AP\_pixar-2

TA: 5:34 PM: FIX Voxel size: 2.3x2.3x2.3 mmPAT: 6 Rel. SNR: 1.00 : epfid

**Properties**

|                                               |                    |
|-----------------------------------------------|--------------------|
| Prio recon                                    | Off                |
| Load images to viewer                         | On                 |
| Inline movie                                  | Off                |
| Auto store images                             | On                 |
| Load images to stamp segments                 | Off                |
| Load images to graphic segments               | Off                |
| Auto open inline display                      | Off                |
| Auto close inline display                     | Off                |
| Start measurement without further preparation | Off                |
| Wait for user to start                        | On                 |
| Start measurements                            | Single measurement |

**Routine**

|                    |              |
|--------------------|--------------|
| Slice group        | 1            |
| Slices             | 45           |
| Dist. factor       | 20 %         |
| Position           | Isocenter    |
| Orientation        | Transversal  |
| Phase enc. dir.    | A >> P       |
| AutoAlign          | Head > Brain |
| Phase oversampling | 0 %          |
| FoV read           | 193 mm       |
| FoV phase          | 100.0 %      |
| Slice thickness    | 2.3 mm       |
| TR                 | 1000 ms      |
| TE                 | 30.0 ms      |
| Averages           | 1            |
| Concatenations     | 1            |
| Filter             | None         |
| Coil elements      | HEA;HEP      |

**Contrast - Common**

|            |          |
|------------|----------|
| TR         | 1000 ms  |
| TE         | 30.0 ms  |
| MTC        | Off      |
| Flip angle | 60 deg   |
| Fat suppr. | Fat sat. |

**Contrast - Dynamic**

|                 |           |
|-----------------|-----------|
| Averages        | 1         |
| Averaging mode  | Long term |
| Reconstruction  | Magnitude |
| Measurements    | 324       |
| Delay in TR     | 0 ms      |
| Multiple series | Off       |

**Resolution - Common**

|                       |         |
|-----------------------|---------|
| FoV read              | 193 mm  |
| FoV phase             | 100.0 % |
| Slice thickness       | 2.3 mm  |
| Base resolution       | 84      |
| Phase resolution      | 100 %   |
| Phase partial Fourier | Off     |
| Interpolation         | Off     |

**Resolution - iPAT**

|                  |              |
|------------------|--------------|
| Accel. mode      | Slice accel. |
| Accel. factor PE | 2            |
| Ref. lines PE    | 24           |

**Resolution - iPAT**

|                     |              |
|---------------------|--------------|
| Accel. factor slice | 3            |
| Reference scan mode | EPI/separate |

**Resolution - Filter Image**

|                   |     |
|-------------------|-----|
| Distortion Corr.  | Off |
| Prescan Normalize | Off |

**Resolution - Filter Rawdata**

|                   |     |
|-------------------|-----|
| Raw filter        | Off |
| Elliptical filter | Off |
| Hamming           | Off |

**Geometry - Common**

|                  |             |
|------------------|-------------|
| Slice group      | 1           |
| Slices           | 45          |
| Dist. factor     | 20 %        |
| Position         | Isocenter   |
| Orientation      | Transversal |
| Phase enc. dir.  | A >> P      |
| FoV read         | 193 mm      |
| FoV phase        | 100.0 %     |
| Slice thickness  | 2.3 mm      |
| TR               | 1000 ms     |
| Multi-slice mode | Interleaved |
| Series           | Interleaved |
| Concatenations   | 1           |

**Geometry - AutoAlign**

|                     |              |
|---------------------|--------------|
| Slice group         | 1            |
| Position            | Isocenter    |
| Orientation         | Transversal  |
| Phase enc. dir.     | A >> P       |
| AutoAlign           | Head > Brain |
| Initial Position    | Isocenter    |
| L                   | 0.0 mm       |
| P                   | 0.0 mm       |
| H                   | 0.0 mm       |
| Initial Rotation    | 0.00 deg     |
| Initial Orientation | Transversal  |

**Geometry - Saturation**

|              |          |
|--------------|----------|
| Fat suppr.   | Fat sat. |
| Special sat. | None     |

**Geometry - Tim Planning Suite**

|                   |      |
|-------------------|------|
| Set-n-Go Protocol | Off  |
| Table position    | H    |
| Table position    | 0 mm |
| Inline Composing  | Off  |

**System - Miscellaneous**

|                     |                |
|---------------------|----------------|
| Positioning mode    | FIX            |
| Table position      | H              |
| Table position      | 0 mm           |
| MSMA                | S - C - T      |
| Sagittal            | R >> L         |
| Coronal             | A >> P         |
| Transversal         | F >> H         |
| Coil Combine Mode   | Sum of Squares |
| Matrix Optimization | Off            |

**System - Miscellaneous**

|                  |                      |
|------------------|----------------------|
| AutoAlign        | Head > Brain         |
| Coil Select Mode | Off - AutoCoilSelect |

**System - Adjustments**

|                          |          |
|--------------------------|----------|
| B0 Shim mode             | Standard |
| B1 Shim mode             | TrueForm |
| Adjust with body coil    | Off      |
| Confirm freq. adjustment | Off      |
| Assume Dominant Fat      | Off      |
| Assume Silicone          | Off      |
| Adjustment Tolerance     | Auto     |

**System - Adjust Volume**

|             |             |
|-------------|-------------|
| Position    | Isocenter   |
| Orientation | Transversal |
| Rotation    | 0.00 deg    |
| A >> P      | 193 mm      |
| R >> L      | 193 mm      |
| F >> H      | 124 mm      |
| Reset       | Off         |

**System - pTx Volumes**

|              |          |
|--------------|----------|
| B1 Shim mode | TrueForm |
| Excitation   | Standard |

**System - Tx/Rx**

|                     |                |
|---------------------|----------------|
| Frequency 1H        | 123.244475 MHz |
| Correction factor   | 1              |
| Gain                | High           |
| Img. Scale Cor.     | 1.500          |
| Reset               | Off            |
| ? Ref. amplitude 1H | 0.000 V        |

**Physio - Signal1**

|                 |         |
|-----------------|---------|
| 1st Signal/Mode | None    |
| TR              | 1000 ms |
| Concatenations  | 1       |

**BOLD**

|                         |          |
|-------------------------|----------|
| GLM Statistics          | Off      |
| Dynamic t-maps          | Off      |
| Ignore meas. at start   | 0        |
| Ignore after transition | 0        |
| Model transition states | On       |
| Temp. highpass filter   | On       |
| Threshold               | 4.00     |
| Paradigm size           | 40       |
| Meas[1]                 | Baseline |
| Meas[2]                 | Baseline |
| Meas[3]                 | Baseline |
| Meas[4]                 | Baseline |
| Meas[5]                 | Baseline |
| Meas[6]                 | Baseline |
| Meas[7]                 | Baseline |
| Meas[8]                 | Baseline |
| Meas[9]                 | Baseline |
| Meas[10]                | Baseline |
| Meas[11]                | Baseline |
| Meas[12]                | Baseline |
| Meas[13]                | Baseline |
| Meas[14]                | Baseline |
| Meas[15]                | Baseline |
| Meas[16]                | Baseline |
| Meas[17]                | Baseline |

**BOLD**

|                   |          |
|-------------------|----------|
| Meas[18]          | Baseline |
| Meas[19]          | Baseline |
| Meas[20]          | Baseline |
| Meas[21]          | Active   |
| Meas[22]          | Active   |
| Meas[23]          | Active   |
| Meas[24]          | Active   |
| Meas[25]          | Active   |
| Meas[26]          | Active   |
| Meas[27]          | Active   |
| Meas[28]          | Active   |
| Meas[29]          | Active   |
| Meas[30]          | Active   |
| Meas[31]          | Active   |
| Meas[32]          | Active   |
| Meas[33]          | Active   |
| Meas[34]          | Active   |
| Meas[35]          | Active   |
| Meas[36]          | Active   |
| Meas[37]          | Active   |
| Meas[38]          | Active   |
| Meas[39]          | Active   |
| Meas[40]          | Active   |
| Motion correction | Off      |
| Spatial filter    | Off      |
| Measurements      | 324      |
| Delay in TR       | 0 ms     |
| Multiple series   | Off      |

**Sequence - Part 1**

|                   |             |
|-------------------|-------------|
| Introduction      | Off         |
| Multi-slice mode  | Interleaved |
| Free echo spacing | Off         |
| Echo spacing      | 0.7 ms      |
| Bandwidth         | 2290 Hz/Px  |

**Sequence - Part 2**

|               |          |
|---------------|----------|
| EPI factor    | 84       |
| RF pulse type | Normal   |
| Gradient mode | Normal   |
| Excitation    | Standard |

**Sequence - pTX Pulses**

\\Study Protocols\BRAIN\Other\TEBC\_5 year old - E161723\ep2d\_p2\_s3\_AP\_sesame

TA: 6:44 PM: FIX Voxel size: 2.3x2.3x2.3 mmPAT: 6 Rel. SNR: 1.00 : epfid

**Properties**

|                                               |                    |
|-----------------------------------------------|--------------------|
| Prio recon                                    | Off                |
| Load images to viewer                         | On                 |
| Inline movie                                  | Off                |
| Auto store images                             | On                 |
| Load images to stamp segments                 | Off                |
| Load images to graphic segments               | Off                |
| Auto open inline display                      | Off                |
| Auto close inline display                     | Off                |
| Start measurement without further preparation | Off                |
| Wait for user to start                        | On                 |
| Start measurements                            | Single measurement |

**Routine**

|                    |              |
|--------------------|--------------|
| Slice group        | 1            |
| Slices             | 45           |
| Dist. factor       | 20 %         |
| Position           | Isocenter    |
| Orientation        | Transversal  |
| Phase enc. dir.    | A >> P       |
| AutoAlign          | Head > Brain |
| Phase oversampling | 0 %          |
| FoV read           | 193 mm       |
| FoV phase          | 100.0 %      |
| Slice thickness    | 2.3 mm       |
| TR                 | 1000 ms      |
| TE                 | 30.0 ms      |
| Averages           | 1            |
| Concatenations     | 1            |
| Filter             | None         |
| Coil elements      | HEA;HEP      |

**Contrast - Common**

|            |          |
|------------|----------|
| TR         | 1000 ms  |
| TE         | 30.0 ms  |
| MTC        | Off      |
| Flip angle | 60 deg   |
| Fat suppr. | Fat sat. |

**Contrast - Dynamic**

|                 |           |
|-----------------|-----------|
| Averages        | 1         |
| Averaging mode  | Long term |
| Reconstruction  | Magnitude |
| Measurements    | 394       |
| Delay in TR     | 0 ms      |
| Multiple series | Off       |

**Resolution - Common**

|                       |         |
|-----------------------|---------|
| FoV read              | 193 mm  |
| FoV phase             | 100.0 % |
| Slice thickness       | 2.3 mm  |
| Base resolution       | 84      |
| Phase resolution      | 100 %   |
| Phase partial Fourier | Off     |
| Interpolation         | Off     |

**Resolution - iPAT**

|                  |              |
|------------------|--------------|
| Accel. mode      | Slice accel. |
| Accel. factor PE | 2            |
| Ref. lines PE    | 24           |

**Resolution - iPAT**

|                     |              |
|---------------------|--------------|
| Accel. factor slice | 3            |
| Reference scan mode | EPI/separate |

**Resolution - Filter Image**

|                   |     |
|-------------------|-----|
| Distortion Corr.  | Off |
| Prescan Normalize | Off |

**Resolution - Filter Rawdata**

|                   |     |
|-------------------|-----|
| Raw filter        | Off |
| Elliptical filter | Off |
| Hamming           | Off |

**Geometry - Common**

|                  |             |
|------------------|-------------|
| Slice group      | 1           |
| Slices           | 45          |
| Dist. factor     | 20 %        |
| Position         | Isocenter   |
| Orientation      | Transversal |
| Phase enc. dir.  | A >> P      |
| FoV read         | 193 mm      |
| FoV phase        | 100.0 %     |
| Slice thickness  | 2.3 mm      |
| TR               | 1000 ms     |
| Multi-slice mode | Interleaved |
| Series           | Interleaved |
| Concatenations   | 1           |

**Geometry - AutoAlign**

|                     |              |
|---------------------|--------------|
| Slice group         | 1            |
| Position            | Isocenter    |
| Orientation         | Transversal  |
| Phase enc. dir.     | A >> P       |
| AutoAlign           | Head > Brain |
| Initial Position    | Isocenter    |
| L                   | 0.0 mm       |
| P                   | 0.0 mm       |
| H                   | 0.0 mm       |
| Initial Rotation    | 0.00 deg     |
| Initial Orientation | Transversal  |

**Geometry - Saturation**

|              |          |
|--------------|----------|
| Fat suppr.   | Fat sat. |
| Special sat. | None     |

**Geometry - Tim Planning Suite**

|                   |      |
|-------------------|------|
| Set-n-Go Protocol | Off  |
| Table position    | H    |
| Table position    | 0 mm |
| Inline Composing  | Off  |

**System - Miscellaneous**

|                     |                |
|---------------------|----------------|
| Positioning mode    | FIX            |
| Table position      | H              |
| Table position      | 0 mm           |
| MSMA                | S - C - T      |
| Sagittal            | R >> L         |
| Coronal             | A >> P         |
| Transversal         | F >> H         |
| Coil Combine Mode   | Sum of Squares |
| Matrix Optimization | Off            |

**System - Miscellaneous**

|                  |                      |
|------------------|----------------------|
| AutoAlign        | Head > Brain         |
| Coil Select Mode | Off - AutoCoilSelect |

**System - Adjustments**

|                          |          |
|--------------------------|----------|
| B0 Shim mode             | Standard |
| B1 Shim mode             | TrueForm |
| Adjust with body coil    | Off      |
| Confirm freq. adjustment | Off      |
| Assume Dominant Fat      | Off      |
| Assume Silicone          | Off      |
| Adjustment Tolerance     | Auto     |

**System - Adjust Volume**

|             |             |
|-------------|-------------|
| Position    | Isocenter   |
| Orientation | Transversal |
| Rotation    | 0.00 deg    |
| A >> P      | 193 mm      |
| R >> L      | 193 mm      |
| F >> H      | 124 mm      |
| Reset       | Off         |

**System - pTx Volumes**

|              |          |
|--------------|----------|
| B1 Shim mode | TrueForm |
| Excitation   | Standard |

**System - Tx/Rx**

|                     |                |
|---------------------|----------------|
| Frequency 1H        | 123.244475 MHz |
| Correction factor   | 1              |
| Gain                | High           |
| Img. Scale Cor.     | 1.500          |
| Reset               | Off            |
| ? Ref. amplitude 1H | 0.000 V        |

**Physio - Signal1**

|                 |         |
|-----------------|---------|
| 1st Signal/Mode | None    |
| TR              | 1000 ms |
| Concatenations  | 1       |

**BOLD**

|                         |          |
|-------------------------|----------|
| GLM Statistics          | Off      |
| Dynamic t-maps          | Off      |
| Ignore meas. at start   | 0        |
| Ignore after transition | 0        |
| Model transition states | On       |
| Temp. highpass filter   | On       |
| Threshold               | 4.00     |
| Paradigm size           | 40       |
| Meas[1]                 | Baseline |
| Meas[2]                 | Baseline |
| Meas[3]                 | Baseline |
| Meas[4]                 | Baseline |
| Meas[5]                 | Baseline |
| Meas[6]                 | Baseline |
| Meas[7]                 | Baseline |
| Meas[8]                 | Baseline |
| Meas[9]                 | Baseline |
| Meas[10]                | Baseline |
| Meas[11]                | Baseline |
| Meas[12]                | Baseline |
| Meas[13]                | Baseline |
| Meas[14]                | Baseline |
| Meas[15]                | Baseline |
| Meas[16]                | Baseline |
| Meas[17]                | Baseline |

**BOLD**

|                   |          |
|-------------------|----------|
| Meas[18]          | Baseline |
| Meas[19]          | Baseline |
| Meas[20]          | Baseline |
| Meas[21]          | Active   |
| Meas[22]          | Active   |
| Meas[23]          | Active   |
| Meas[24]          | Active   |
| Meas[25]          | Active   |
| Meas[26]          | Active   |
| Meas[27]          | Active   |
| Meas[28]          | Active   |
| Meas[29]          | Active   |
| Meas[30]          | Active   |
| Meas[31]          | Active   |
| Meas[32]          | Active   |
| Meas[33]          | Active   |
| Meas[34]          | Active   |
| Meas[35]          | Active   |
| Meas[36]          | Active   |
| Meas[37]          | Active   |
| Meas[38]          | Active   |
| Meas[39]          | Active   |
| Meas[40]          | Active   |
| Motion correction | Off      |
| Spatial filter    | Off      |
| Measurements      | 394      |
| Delay in TR       | 0 ms     |
| Multiple series   | Off      |

**Sequence - Part 1**

|                   |             |
|-------------------|-------------|
| Introduction      | Off         |
| Multi-slice mode  | Interleaved |
| Free echo spacing | Off         |
| Echo spacing      | 0.7 ms      |
| Bandwidth         | 2290 Hz/Px  |

**Sequence - Part 2**

|               |          |
|---------------|----------|
| EPI factor    | 84       |
| RF pulse type | Normal   |
| Gradient mode | Normal   |
| Excitation    | Standard |

**Sequence - pTX Pulses**
